# Supplementary material for: Dimethylamine adducts of allylic triorganoboranes as effective reagents for Petasis-type homoallylation of primary amines with formaldehyde
Source: Royal Society of Chemistry journal article supplement (doi:10.1039/c8ob02152j), 2018-01-01

## Dimethylamine adducts of allylic triorganoboranes as effective reagents for Petasis-type homoallylation of primary amines with formaldehyde

Nikolai Yu. Kuznetsov,<sup>[a]\*</sup> Rabdan M. Tikhov,<sup>[a]</sup> Tatiana V. Strelkova<sup>[a]</sup> and Yuri N. Bubnov<sup>[a],[b]</sup>

<sup>[a]</sup>A.N. Nesmeyanov Institute of Organoelement Compounds, Russian Academy of Sciences, Vavilov 28, 119991, Moscow, Russian Federation. E-mail: [nkuznff@ineos.ac.ru](mailto:nkuznff@ineos.ac.ru)

<sup>[b]</sup>N.D. Zelinsky Institute of Organic Chemistry, Russian Academy of Sciences, Leninsky pr. 47, 119991 Moscow, Russian Federation.

### Supporting Information

#### Table of content

|                                                                                        |               |
|----------------------------------------------------------------------------------------|---------------|
| Experimental procedures for synthesis of <b>1b-e</b>                                   | .....S2-S4    |
| Experimental procedures for the aminoallylation                                        | .....S4-S13   |
| Copies <sup>1</sup> H/ <sup>13</sup> C/ <sup>11</sup> B spectra of adducts <b>1b-e</b> | .....S14-S28  |
| Copies <sup>1</sup> H/ <sup>13</sup> C spectra of homoallylamines                      | ..... S29-S59 |

**General.** The manipulations with sensitive to air compounds were carried out under inert atmosphere of dry Ar. NMR spectra were recorded on Bruker Avance-400 instrument. Chemical shifts are reported in ppm with the solvent resonance as the internal standard:  $^1\text{H}$  ( $\text{CHCl}_3$ , 7.26 ppm),  $^{13}\text{C}$  ( $\text{CDCl}_3$ , 77.16 ppm),  $^1\text{H}$  ( $\text{C}_6\text{D}_6$ , 7.16 ppm),  $^{13}\text{C}$  ( $\text{C}_6\text{D}_6$ , 128.06 ppm),  $^{11}\text{B}\{^1\text{H}\}$  NMR chemical shifts are reported in ppm relative to  $\text{BF}_3\cdot\text{OEt}_2$ . Column chromatography was carried out using silica gel 60–230 mesh (Merck). Thin layer chromatography was run on AlugramSilG/UV<sub>254</sub> (Macherey-Nagel). Melting points were measured on a Stuart SMP10 capillary melting point apparatus. Triallylborane [1], triprenylborane [2] and triallylborane-dimethylamine adduct [3] were prepared according to the described procedures.

### Triprenylborane-dimethylamine adduct (1b)

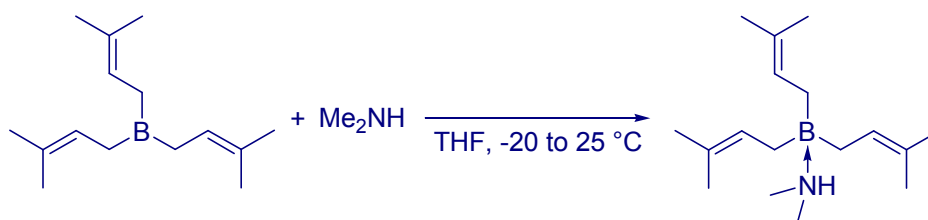

To 2M solution of  $\text{Me}_2\text{NH}$  in THF (8.5 ml, 17 mmol) was added dropwise with stirring triprenylborane (1.53 g, 1.95 ml, 7.0 mmol) at  $-20\text{ }^\circ\text{C}$ . The cooling bath was removed and all volatiles were removed in vacuum, first with water-jet pump followed by oil-pump that furnished pure adduct **1b** (1.84 g, 100%) as colorless oil.  $^1\text{H}$  NMR (400 MHz,  $\text{C}_6\text{D}_6$ ):  $\delta$  5.49 (t,  $J = 8.0$  Hz, 3H, 3CH=), 2.50 (br. s, 1H, NH), 1.77 (s, 9H, 3Me), 1.75 (s, 6H,  $\text{Me}_2\text{N}$ ), 1.68 (s, 9H, 3Me), 1.20 (d,  $J = 8.1$  Hz, 6H, 3 $\text{CH}_2$ ) ppm.  $^{13}\text{C}$  NMR (101 MHz,  $\text{C}_6\text{D}_6$ ):  $\delta$  128.69 3C, 125.47 3C, 37.56 2C, 26.63 3C, 22.76 br. 3C, 18.07 3C.  $^{11}\text{B}$  NMR (128 MHz,  $\text{C}_6\text{D}_6$ ):  $\delta$  -1.47 ppm.  $\text{C}_{17}\text{H}_{34}\text{BN}$  (263.27): calcd. C, 77.56; H, 13.02; N, 5.32; B, 4.11; found: C, 77.48; H, 12.94; N, 5.35; B, 4.00.

### Synthesis of *trans*-cinnamyl(dipropyl)borane-dimethylamine adduct (1c)

#### *trans*-Cinnamyl(dipropyl)borane

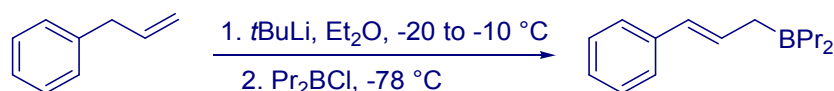

$t\text{BuLi}$  (1.4M, 12.8 ml, 18mmol) was added to a stirred solution of allylbenzene (2.00 g, 16.0 mmol) in  $\text{Et}_2\text{O}$  (30 ml) at  $-70$  to  $-60\text{ }^\circ\text{C}$  and stirring was continued for 10 min and then for 40 min at  $-20$  to  $-10\text{ }^\circ\text{C}$ . The prepared solution of cinnamyllithium was added dropwise via syringe to a solution of  $\text{Pr}_2\text{BCl}$  (2.38 g, 18.0 mmol) in pentane (10 ml) at  $-78\text{ }^\circ\text{C}$ . The reaction

mixture was then allowed to warm to room temperature before quenching with TMSCl (5.1 mL, 40.0 mmol). The solvents were removed under reduced pressure and the oily residue was stirred with *n*-hexane (10 mL) and supernatant was separated from the precipitate of LiCl. The *n*-hexane solution was concentrated, and vacuum distillation of the residue gave *trans*-cinnamyl(dipropyl)borane (2.78 g, 81%) as a colorless liquid, b.p. 94–96 °C (0.1 Torr). <sup>1</sup>H NMR (400 MHz, CDCl<sub>3</sub>): δ 7.36–7.28 (m, 4H), 7.20–7.17 (m, 1H, Ph), 6.41 (dt, *J* = 7.6, 15.7 Hz, 1H, CH=), 6.31 (d, *J* = 15.8 Hz, 1H, =CHPh), 2.33 (d, *J* = 7.5 Hz, 2H, CH<sub>2</sub>CH=), 1.53 (m., 4H, 2CH<sub>2</sub>), 1.31 (t, *J* = 7.7 Hz, 4H, 2CH<sub>2</sub>B), 0.97 (t, *J* = 7.3 Hz, 6H, 2CH<sub>3</sub>) ppm. <sup>13</sup>C NMR (100 MHz, CDCl<sub>3</sub>): δ 138.58, 129.59, 128.58 2C, 128.31, 126.50, 125.77 2C, 33.87 br., 31.18 br. 2C, 18.01 2C, 17.63 2C ppm. <sup>11</sup>B NMR (128 MHz, CDCl<sub>3</sub>): δ 85.24 (s) ppm. **NMR spectra coincide with the literature data [4].**

#### *trans*-Cinnamyl(dipropyl)borane-dimethylamine adduct (**1c**)

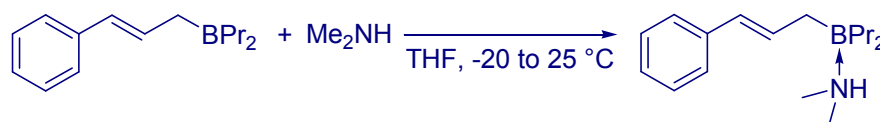

To 2M solution of Me<sub>2</sub>NH in THF (8.0 ml, 16.0 mmol) was added *trans*-cinnamyl(dipropyl)borane (2.46 g, 11.5 mmol) dropwise with stirring at -20 °C. The cooling bath was removed and the solution was evaporated to dryness in vacuum to give adduct **1c** (4.00 g, 97%) as oil which was used without further purification. <sup>1</sup>H NMR (400 MHz, C<sub>6</sub>D<sub>6</sub>): δ 7.47 (d, *J* = 7.7 Hz, 2H, Ph), 7.29 (t, *J* = 7.5 Hz, 2H, Ph), 7.14 (t, *J* = 7.1 Hz, 1H, Ph), 6.80 (dt, *J* = 8.3, 15.7 Hz, 1H, CH=), 6.34 (d, *J* = 15.7 Hz, 1H, =CHPh), 2.31 (br. s, 1H, NH); 1.68–1.63 (d, *J* = 5.6 Hz, 3H), 1.50 (dt, *J* = 24.2, 12.2 Hz, 3H), 1.34 (t, *J* = 6.9 Hz, 3H), 0.47 (dd, *J* = 12.4, 7.8 Hz, 2H) ppm. <sup>13</sup>C NMR (101 MHz, C<sub>6</sub>D<sub>6</sub>): δ 139.78, 137.48, 128.89 2C, 126.06, 126.03, 125.64 2C, 36.94, 29.26 br., 25.80 br. 2C, 20.59 2C, 19.68 2C ppm. <sup>11</sup>B NMR (128 MHz, C<sub>6</sub>D<sub>6</sub>): δ -1.55 ppm. C<sub>17</sub>H<sub>30</sub>BN (259.24): calcd. C, 78.76; H, 11.66; N, 5.40; found: C, 78.50; H, 11.50; N, 5.28.

#### Triallylborane-1,4-diazabicyclo[2.2.2]octane adduct (**1d**)

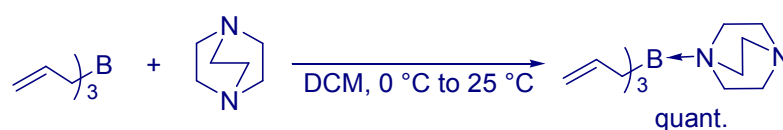

To a solution of dried and recrystallized DABCO (2.7 g, 24.1 mmol) in DCM (10 ml) was added triallylborane (3.23 g, 4.17 ml, 24.1 mmol) with stirring and cooling in an ice-bath. The solvent

was removed in vacuum to give adduct **1d** (5.93 g, 100%) as white crystalline solid, m.p. 58-59 °C (under Ar in a sealed capillary) which is not sensitive to air at ambient temperature (20 min exposure). <sup>1</sup>H NMR (400 MHz, CDCl<sub>3</sub>): δ 6.11-6.00 (m, 3H, 3CH=), 4.78-4.70 (m, 6H, 3CH<sub>2</sub>=), 2.91 (s, 12H, 6CH<sub>2</sub>N), 1.32 (d, *J* = 7.9 Hz, 6H, 3CH<sub>2</sub>) ppm. <sup>13</sup>C NMR (101 MHz, CDCl<sub>3</sub>): δ 143.80 3C, 110.71 3C, 46.26 br. 6C, 29.10 br. 3C ppm. <sup>11</sup>B NMR (128 MHz, CDCl<sub>3</sub>): δ 0.74 ppm. C<sub>15</sub>H<sub>27</sub>BN<sub>2</sub> (246.2): calcd. C, 73.18; H, 11.05; N, 11.38; B, 4.39; found: C, 73.21; H, 11.17; N, 11.31; B, 4.27.

### Triallylborane-trimethylamine adduct (**1e**) [5]

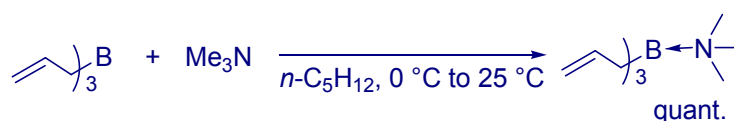

A current of dry trimethylamine (from Me<sub>3</sub>NHCl and KOH) was passed through a solution of triallylborane (2.0 ml, 1.55 g, 11.6 mmol) in pentane (5 ml) upon cooling in an ice-bath. Then the solvent was evaporated under reduced pressure and the vessel was filled with argon to give the adduct **1e** (2.24 g, 100%) as colorless, moderately pyrophoric liquid. <sup>1</sup>H NMR (400 MHz, C<sub>6</sub>D<sub>6</sub>): δ 6.18-6.07 (m, 3H, 3CH=), 4.89-4.81 (m, 6H, 3CH<sub>2</sub>=), 1.95 (s, 9H, 3Me); 1.38 (d, *J* = 8.0 Hz, 6H, 3CH<sub>2</sub>) ppm. <sup>13</sup>C NMR (101 MHz, C<sub>6</sub>D<sub>6</sub>): δ 144.15 3C, 110.62 3C, 49.29 3C, 29.73 br. 3C ppm. <sup>11</sup>B NMR (128 MHz, C<sub>6</sub>D<sub>6</sub>): δ 0.98 ppm.

### General procedure for homoallylation of primary amines with dimethylamine adducts of allylic triorganoboranes

To a solution of primary amine (1 mmol) in MeOH (0.5-0.8 ml) was added 37% solution of formaldehyde (74-81 μL, 1.0-1.1 mmol). The mixture was left for 20 min to ensure complete formation of an iminal, followed by addition of an allylborane-dimethylamine adduct. The reaction was stirred for 30 min at ambient temperature and 1 h at 40 °C. The progress of the reaction was monitored by TLC and NMR. After completion the reaction mixture was concentrated on the rotavapor under reduced pressure. In case of volatile amine equivalent amount of 6 M HCl solution was added before evaporation. The dry residue was treated with NaOH 20% and extracted with a mixture of Et<sub>2</sub>O/*n*-C<sub>5</sub>H<sub>12</sub>, organic layer was washed with NaOH 10%, dried with K<sub>2</sub>CO<sub>3</sub> and concentrated. The resulting oil was purified by FC to give corresponding homoallylamine derivative. Alternatively amine was isolated as hydrochloride salt by treatment of its ethereal solution with 4M HCl in dioxane.

### ***N,N*-Di(3-butenyl)amine hydrochloride (2a)**

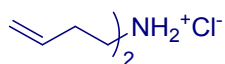

A solution of adduct **1a** (0.72 g, 4.0 mmol) in MeOH (2 ml) was combined with methanolic 7M NH<sub>3</sub> (2.0 ml, 14 mmol) followed by dropwise addition of 37% solution of formaldehyde (0.88 ml, 12.0 mmol) with stirring and external cooling with ice-bath. The obtained solution was heated on a water bath for 3 days at 55 °C, the progress of the reaction was monitored by <sup>1</sup>H and <sup>11</sup>B NMR. When the signal of ammonia adduct ( $\delta$  <sup>11</sup>B -8.7 ppm) was disappeared 6M HCl (5 ml, 30 mmol) was added and the volatiles were removed on the rotavapor under reduced pressure. The dry solid residue was extracted with boiling CHCl<sub>3</sub> twice. Extracts were dried with MgSO<sub>4</sub>, filtered and concentrated to give pure amine salt **2a** (0.68 g, 70%) as white solid, m.p. 251-252 °C. <sup>1</sup>H NMR (400 MHz, CDCl<sub>3</sub>):  $\delta$  9.60 (br. s, 2H, NH<sub>2</sub>), 5.76 (ddt,  $J$  = 13.0, 10.5, 6.7 Hz, 2H, 2CH=), 5.17-5.10 (m, 4H, 2CH<sub>2</sub>=), 3.10–2.87 (m, 4H, 2NCH<sub>2</sub>), 2.67 (dd,  $J$  = 14.8, 6.8 Hz, 4H, 2CH<sub>2</sub>CH=) ppm. <sup>13</sup>C NMR (101 MHz, CDCl<sub>3</sub>):  $\delta$  132.56 2C, 118.64 2C, 47.05 2C, 30.09 2C ppm. Anal. Calcd for C<sub>8</sub>H<sub>16</sub>ClN (161.67): C, 59.43; H, 9.98; N, 8.66; found: C, 59.42; H, 9.92; N, 8.70.

### **3-Butenylamine hydrochloride (2b)**

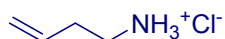

4M HCl solution in dioxane (12 ml, 48.0 mmol) was added to MeOH (45 ml) followed by addition of methanolic 7M NH<sub>3</sub> (33.0 ml, 0.23 mol). To this mixture 37% solution of formaldehyde (0.88 ml, 12.0 mmol) was added dropwise with stirring. After then adduct **1a** (0.75 g, 4.2 mmol) was appended to the mixture and left for 3 days at 55 °C in a sealed vessel. The progress of the reaction was monitored by <sup>1</sup>H and <sup>11</sup>B NMR. When the signal of ammonia adduct ( $\delta$  <sup>11</sup>B -8.7 ppm) was disappeared 6M HCl (30 ml, 0.18 mol) was added and the volatiles were removed on the rotavapor under reduced pressure. The dry solid residue was extracted with boiling CHCl<sub>3</sub> trice. Extracts were dried with MgSO<sub>4</sub>, filtered and concentrated to give a mixture of mono- and dibutenylamine salts in molar ratio 4:1. The powder of hydrochlorides was covered with Et<sub>2</sub>O/*n*-heptane (40 ml) and treated with 50% KOH. Organic extract was separated dried over pellets of KOH and distilled at atmospheric pressure. Distillate containing homoallylamine was cooled and treated with 4M HCl in dioxane (2.0 ml, 8.0 mmol) to give hydrochloride salt of homoallylamine (0.69 g, 54%) as white crystals. <sup>1</sup>H NMR (400 MHz, DMSO-D<sub>6</sub>):  $\delta$  8.21 (br.s, 3H, NH<sub>3</sub>); 5.79 (ddt,  $J$  = 16.9, 10.2, 6.6 Hz, 1H, CH=); 5.15-5.05 (m, 2H, CH<sub>2</sub>=); 2.83-2.76 (m,

2H,  $\text{CH}_2\text{NH}_3$ ), 2.34 (dd,  $J = 14.8, 6.9$  Hz, 2H,  $\text{CH}_2\text{CH}=\text{)$  ppm. **NMR spectra coincide with the literature data [6].**

#### ***N*-Allyl-*N*-(3-butenyl)amine hydrochloride (2c)**

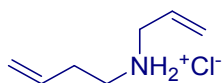

To a solution of allylamine (0.46 g, 0.60 ml, 8.0 mmol) in MeOH (1.8 ml) was added 37% formaldehyde (0.37 ml, 5.0 mmol) and the solution was left for 20 min followed by the addition of **1a** adduct (0.32 g, 1.8 mmol). After 30 min, the reaction mixture was heated on the water bath for 1 h at 40 °C to complete the reaction. Dissolved amines were treated with 4M HCl in dioxane (2.5 ml, 10.0 mmol) to avoid loss of the product during evaporation. The volatiles were removed under reduced pressure and the residue was treated with 20% NaOH, extracted with Et<sub>2</sub>O/*n*-pentane (3:1). The combined extracts were dried with K<sub>2</sub>CO<sub>3</sub> and heated to evaporate allylamine at ambient pressure. The residual free amine was treated with 4.5M HCl in Et<sub>2</sub>O, precipitate was collected by filtration, dried in vacuum to give hydrochloride salt **2c** (0.58 g, 78%), as white crystalline solid, m.p. 192-194 °C. <sup>1</sup>H NMR (CDCl<sub>3</sub>, 400 MHz): δ 9.67 (br.s, 2H, NH<sub>2</sub>), 6.10-6.01 (m, 1H, CH=), 5.77-5.68 (m, 1H, CH=), 5.48-5.41 (m, 2H, CH<sub>2</sub>=), 5.15-5.08 (m, 2H, CH<sub>2</sub>=), 3.58 (s, 2H, NCH<sub>2</sub>CH=), 2.93 (s, 2H, NCH<sub>2</sub>CH<sub>2</sub>), 2.62-2.60 (m, 2H, NCH<sub>2</sub>CH<sub>2</sub>) ppm. <sup>13</sup>C NMR (101 MHz, CDCl<sub>3</sub>): δ 132.53, 127.78, 124.14, 118.60, 49.65, 45.61, 30.08 ppm. **NMR spectra coincide with the literature data [7].**

#### ***N*-Allyl-*N*-(2,2-dimethyl-3-butenyl)amine hydrochloride (2d)**

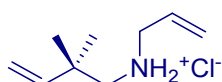

To a solution of allylamine (0.114 g, 0.15 ml, 2.0 mmol) in MeOH (0.6 ml) was added 37% formaldehyde (74 μL, 1.0 mmol) and the solution was left for 20 min followed by addition of **1b** adduct (0.105 g, 0.4 mmol). After 30 min, the reaction mixture was heated on the water bath for 1 h at 40 °C to complete the reaction. The volatiles were removed under reduced pressure and the residue was treated with 20% NaOH, extracted with Et<sub>2</sub>O/*n*-pentane (3:1), extracts were dried with K<sub>2</sub>CO<sub>3</sub>, evaporated and the product was dissolved in Et<sub>2</sub>O and transferred to hydrochloride by addition of 4M HCl in dioxane (0.3 ml, 1.2 mmol). The mixture was evaporated, triturated in Et<sub>2</sub>O. The precipitate was filtered, washed with Et<sub>2</sub>O and dried in vacuum to give **2d** (139 mg, 79%) as white powder, m.p. 135-136 °C. <sup>1</sup>H NMR (400 MHz,

CDCl<sub>3</sub>):  $\delta$  9.19 (br. s, 2H, NH<sub>2</sub>), 6.07 (ddt,  $J = 14.2, 10.4, 7.0$  Hz, 1H, CH=allyl), 5.83 (dd,  $J = 17.4, 10.8$  Hz, 1H, CH=prenyl), 5.45–5.33 (m, 2H, CH<sub>2</sub>=allyl), 5.18–5.05 (m, 2H, CH<sub>2</sub>=prenyl), 3.62 (d,  $J = 6.8$  Hz, 2H, CH<sub>2</sub>N<sub>allyl</sub>), 2.70 (s, 2H, CH<sub>2</sub>N<sub>prenyl</sub>), 1.19 (s, 6H, 2Me) ppm. <sup>13</sup>C NMR (101 MHz, CDCl<sub>3</sub>):  $\delta$  142.98, 128.30, 124.29, 115.16, 55.87, 51.05, 36.42, 25.18 2C. Anal. Calcd for C<sub>9</sub>H<sub>18</sub>ClN (175.7): C, 61.52; H, 10.33; N, 7.97; found: C, 61.48; H, 10.34; N, 7.93.

### ***N*-(But-3-enyl)hepta-1,6-dien-4-amine hydrochloride (2e)**

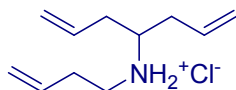

The reaction was performed following the procedure described for **2d**. Hepta-1,6-dien-4-amine (0.56 g, 5.0 mmol), **1a** (0.39 g, 2.2 mmol), 37% CH<sub>2</sub>O (0.48 g, 0.44 ml, 6.0 mmol) in MeOH (1.8 ml) that gave **2e** (0.81 g, 80%) as white powder, m.p. 72–73 °C. <sup>1</sup>H NMR (400 MHz, CDCl<sub>3</sub>):  $\delta$  9.46 (br. s, 2H, NH<sub>2</sub>), 5.81 (ddt,  $J = 17.3, 10.4, 7.1$  Hz, 2H, 2CH=), 5.71 (ddt,  $J = 16.9, 10.2, 6.7$  Hz, 1H, CH=), 5.19–5.15 (m, 4H, 2CH<sub>2</sub>=), 5.13–5.05 (m, 2H, CH<sub>2</sub>=), 3.19 (s, 1H, CHN), 3.00 (s, 2H, CH<sub>2</sub>N), 2.73–2.62 (m, 4H, (CH<sub>2</sub>)<sub>2</sub>CHN), 2.53 (dt,  $J = 14.7, 7.4$  Hz, 2H, CH<sub>2</sub>CH<sub>2</sub>N) ppm. <sup>13</sup>C NMR (101 MHz, CDCl<sub>3</sub>):  $\delta$  132.79, 132.03 2C, 120.04 2C, 118.31, 57.14, 44.53, 34.53 2C, 30.10 ppm. Anal. Calcd for C<sub>11</sub>H<sub>20</sub>ClN (201.74): C, 65.49; H, 9.99; N, 6.94; found: C, 65.51; H, 9.94; N, 6.97.

### ***(R)*-N-(1-Phenylethyl)but-3-en-1-amine (2f)**

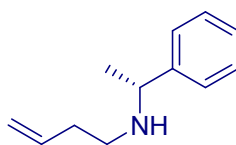

To a solution (*R*)-1-phenylethylamine (0.121 g, 0.128 ml, 1.0 mmol) in MeOH (0.5 ml) was added 37% formaldehyde (81  $\mu$ L, 1.1 mmol) and DABCO (0.11 g, 1.0 mmol) then the mixture was left for 20 min followed by the addition of adduct **1a** (68 mg, 0.38 mmol). The reaction mixture was stirred for 1 h at 25 °C and 1 h at 40 °C, the progress of the reaction was monitored by NMR. After completion all volatiles were removed under reduced pressure and the residue was treated with 20% NaOH, extracted with Et<sub>2</sub>O/*n*-pentane (3:1), extracts were washed with water, dried with K<sub>2</sub>CO<sub>3</sub>, evaporated and the residual oil was subjected to chromatography (*n*-hexane/EtOAc, 1:1) that afford **2f** (0.146 g, 82%) as oil. <sup>1</sup>H NMR (400 MHz, CDCl<sub>3</sub>):  $\delta$  7.36–7.29 (m, 4H, Ph), 7.28–7.21 (m, 1H, Ph), 5.76 (ddt,  $J = 17.0, 10.1, 6.8$  Hz, 1H, CH=), 5.14–4.98 (m, 2H, CH<sub>2</sub>=), 3.77 (q,  $J = 6.6$  Hz, 1H, CHPh), 2.63–2.47 (m, 2H, CH<sub>2</sub>N), 2.24 (q,  $J = 6.7$  Hz, 2H, CH<sub>2</sub>CH=), 1.36 (d,  $J = 6.6$  Hz, 4H, Me and NH) ppm. <sup>13</sup>C NMR (101 MHz, CDCl<sub>3</sub>):  $\delta$

145.80, 136.60, 128.45 2C, 126.89, 126.60 2C, 116.35, 58.29, 46.75, 34.41, 24.41 ppm. **NMR spectra coincide with the literature data [8].**

#### **(R)-2-(But-3-enylamino)-2-phenylethanol (2g)**

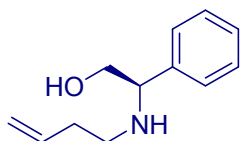

To a solution of (*R*)-phenylglycinol (0.137 g, 1.0 mmol) in MeOH (0.5 ml) was added 37% formaldehyde (81  $\mu$ L, 1.1 mmol) with stirring, after 2 min (before starting of precipitation) **1a** (68 mg, 0.38 mmol) was added. The reaction mixture was heated at 50  $^{\circ}$ C for 1h, and then evaporated under reduced pressure. To the oily residue 5% NaOH was added and extracted with *n*-hexane (5 ml x 3). The combined extracts were washed with 10% NaOH, dried with  $K_2CO_3$  and evaporated to dryness to give pure amine **2g** (0.153 g, 80%) as oil, which was crystallized upon cooling, m.p. 55-56  $^{\circ}$ C,  $[\alpha]_D^{25}$  -63.9 (C, 1.5 in  $CHCl_3$ ) [lit. **[9]** m.p. 46-48  $^{\circ}$ C,  $[\alpha]_D^{25}$  -57.4 (C, 1.5 in  $CHCl_3$ ); **[10]** m.p. 46  $^{\circ}$ C,  $[\alpha]_D^{25}$  -64.9 (C, 0.5 in  $CHCl_3$ )].  $^1H$  NMR (400 MHz,  $CDCl_3$ ):  $\delta$  7.40–7.34 (m, 2H, Ph), 7.34–7.27 (m, 3H, Ph), 5.78 (ddt,  $J = 17.0, 10.1, 6.8$  Hz, 1H, CH=), 5.14–5.03 (m, 2H,  $CH_2=$ ), 3.80 (dd,  $J = 8.7, 4.3$  Hz, 1H, CHN), 3.73 (dd,  $J = 10.8, 4.4$  Hz, 1H,  $CH_AH_B(OH)$ ), 3.58 (dd,  $J = 10.8, 8.8$  Hz, 1H,  $CH_AH_B(OH)$ ), 2.70–2.52 (m, 2H,  $CH_2N$ ), 2.27 (q,  $J = 6.8$  Hz, 2H,  $CH_2CH=$ ) ppm.  $^{13}C$  NMR (101 MHz,  $CDCl_3$ ):  $\delta$  140.68, 136.35, 128.65, 127.60, 127.29, 116.59, 66.69, 64.66, 46.37, 34.34. **NMR spectra coincide with the literature data [9, 10].**

#### **(S)-2-(But-3-enylamino)-3-phenylpropanoic acid (2h)**

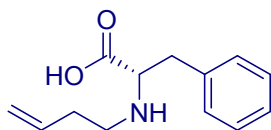

(*S*)-Phenylalanine (0.165 g, 1.0 mmol) was dissolved in MeOH (3.6 ml) containing MeONa (0.3 mmol) and  $Et_3N$  (0.21 g, 0.292 ml, 2.1 mmol), to this solution was added 37% formaldehyde (81  $\mu$ L, 1.1 mmol) with stirring. After 10 min adduct **1a** (68 mg, 0.38 mmol) was added and the mixture was left for 3 h at 25  $^{\circ}$ C. Neutralization of excess of  $Et_3N$  was performed by addition of  $NH_4Cl$  solution, after that **2h** was precipitated of the solution. The precipitate was filtered washed successively with chilled aqueous MeOH and  $Et_2O$  to furnish pure aminoacid **2h** (0.208 g, 95%) as white crystals, m.p. 266  $^{\circ}$ C (sub.),  $[\alpha]_D^{25}$  +28.9 (C, 1 in 6M HCl).  $^1H$  NMR (400 MHz,  $D_2O/DCI$ ):  $\delta$  6.75–6.53 (m, 5H, Ph), 5.09–5.00 (m, 1H, CH=), 4.48-4.41 (m, 2H,  $CH_2=$ ),



3.62 (t,  $J = 6.3$  Hz, 1H, CHN), 2.65 (dd,  $J = 14.4, 5.8$  Hz, 1H,  $\text{CH}_A\text{H}_B\text{Ph}$ ), 2.57 (dd,  $J = 14.3, 7.0$  Hz, 1H,  $\text{CH}_A\text{H}_B\text{Ph}$ ), 2.46 (t,  $J = 7.3$  Hz, 2H,  $\text{CH}_2\text{N}$ ), 1.72 (q,  $J = 7.1$  Hz, 2H,  $\text{CH}_2\text{CH}=\text{}$ ) ppm.  $^{13}\text{C}$  NMR (101 MHz,  $\text{D}_2\text{O}/\text{DCI}$ ):  $\delta$  169.69, 132.98, 132.00, 128.86 2C, 128.64 2C, 127.52, 118.40, 60.24, 45.37, 34.21, 29.16 ppm. Anal. Calcd for  $\text{C}_{13}\text{H}_{17}\text{NO}_2$  (219.28): C, 71.21; H, 7.81; N, 6.39; found: C, 71.25; H, 7.80; N, 6.39.

### ***N*-(But-3-enyl)benzenamine (2i)**

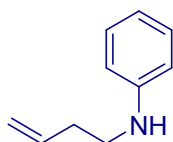

To a solution of aniline (0.14 g, 1.5 mmol) in MeOH (0.6 ml) was added 37% solution of formaldehyde (0.118 ml, 0.129 g, 1.6 mmol), DABCO (0.17 g, 1.5 mmol) and after 20 min adduct **1a** (97 mg, 0.54 mmol) was added to the solution. The mixture was left for 30 min at 25 °C, and 1 h at 40 °C, after then evaporated under reduced pressure. The resulting oil was treated with 10% NaOH and extracted with *n*-pentane (5 ml x 3), dried with  $\text{K}_2\text{CO}_3$ , evaporated and purified by FC ( $R_f = 0.67$ , *n*- $\text{C}_6\text{H}_{14}/\text{EtOAc}$ , 4:1) to give amine **2i** (0.196 g, 89%) as yellowish oil.  $^1\text{H}$  NMR (400 MHz,  $\text{CDCl}_3$ ):  $\delta$  7.27 (t,  $J = 7.9$  Hz, 1H, Ph), 6.80 (t,  $J = 7.3$  Hz, 1H, Ph), 6.70 (d,  $J = 8.0$  Hz, 1H, Ph), 5.92 (ddt,  $J = 17.0, 10.1, 6.8$  Hz, 1H,  $\text{CH}=\text{}$ ), 5.26-5.19 (m, 2H,  $\text{CH}_2=\text{}$ ), 3.74 (br. s, 1H, NH), 3.26 (t,  $J = 6.7$  Hz, 2H,  $\text{CH}_2\text{N}$ ), 2.47 (q,  $J = 6.7$  Hz, 1H,  $\text{CH}_2\text{CH}=\text{}$ ) ppm.  $^{13}\text{C}$  NMR (101 MHz,  $\text{CDCl}_3$ ):  $\delta$  148.33, 135.88, 129.32 2C, 117.42, 117.15, 112.96 2C, 42.86, 33.70 ppm. **NMR spectra coincide with the literature data [11].**

### ***N*-(But-3-enyl)benzene-1,2-diamine (2j)**

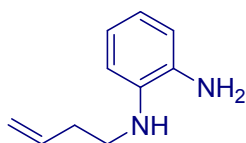

The reaction was performed following the procedure described for **2f**. *o*-Phenylenediamine (0.108 g, 1.0 mmol), 37% formaldehyde (81  $\mu\text{L}$ , 1.1 mmol), DABCO (0.11 g, 1.0 mmol), **1a** (68 mg, 0.38 mmol) and MeOH (0.6 ml). According to  $^1\text{H}$  NMR the reaction mixture consisted of **2j**:1,2-di(homoallylamine)-derivative in ratio 4.2:1. The mixture was separated by FC ( $R_f = 0.21$ , *n*- $\text{C}_6\text{H}_{14}/\text{EtOAc}$ , 4:1) to give **2j** (97 mg, 60%) as yellow oil.  $^1\text{H}$  NMR (400 MHz,  $\text{CDCl}_3$ ):  $\delta$  6.96–6.89 (m, 1H, Ph), 6.82–6.73 (m, 3H, Ph), 5.94 (ddt,  $J = 17.0, 10.2, 6.8$  Hz, 1H,  $\text{CH}=\text{}$ ), 5.31–5.16 (m, 2H,  $\text{CH}_2=\text{}$ ), 3.39 (br. s, 3H,  $\text{NH}_2$  and NH), 3.24 (t,  $J = 6.8$  Hz, 2H,  $\text{CH}_2\text{N}$ ), 2.50 (q,

$J = 6.7$  Hz, 2H,  $\text{CH}_2\text{CH}=\text{}$ ) ppm.  $^{13}\text{C}$  NMR (101 MHz,  $\text{CDCl}_3$ ):  $\delta$  137.71, 135.98, 134.21, 120.60, 118.50, 116.91, 116.38, 111.71, 43.06, 33.74 ppm. **NMR spectra coincide with the literature data [12].**

### ***N*-(3-Butenyl)-1-adamantanamine (2k)**

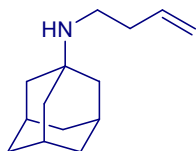

The reaction was performed following the procedure described for **2f**. 1-Adamantanamine (0.151 g, 1.0 mmol), 37% formaldehyde (81  $\mu\text{L}$ , 1.1 mmol), DABCO (0.11 g, 1.0 mmol), **1a** (68 mg, 0.38 mmol) and MeOH (0.6 ml). The mixture was separated by FC in EtOAc to give **2k** (80 mg, 39%) as oil.  $^1\text{H}$  NMR (400 MHz,  $\text{CDCl}_3$ ):  $\delta$  5.74 (ddt,  $J = 17.2, 10.2, 6.8$  Hz, 1H,  $\text{CH}=\text{}$ ), 5.07 (dd,  $J = 17.2, 1.6$  Hz, 1H,  $\text{CH}_\text{A}\text{H}_\text{B}=\text{}$ ), 5.00 (dd,  $J = 10.3, 0.8$  Hz, 1H,  $\text{CH}_\text{A}\text{H}_\text{B}=\text{}$ ), 2.62 (t,  $J = 7.0$  Hz, 2H,  $\text{CH}_2\text{N}$ ), 2.19 (q,  $J = 7.0$  Hz, 2H,  $\text{CH}_2\text{CH}=\text{}$ ), 2.03 (s, 3H, 3CH(Ad)), 1.69–1.52 (m, 12H, 6 $\text{CH}_2$ (Ad)), 1.06 (br. s, NH) ppm.  $^{13}\text{C}$  NMR (101 MHz,  $\text{CDCl}_3$ ):  $\delta$  136.85, 116.33, 50.33, 42.87 3C, 39.47, 36.86 3C, 35.22, 29.67 3C ppm. Anal. Calcd for  $\text{C}_{14}\text{H}_{23}\text{N}$  (205.34): C, 81.89; H, 11.29; N, 6.82; found: C, 81.85; H, 11.42; N, 6.69.

### ***N*-(But-3-en-1-yl)-1-cyclohexyl-1*H*-pyrazol-5-amine (2l)**

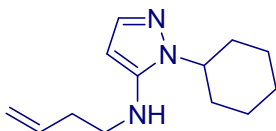

The reaction was performed following the procedure described for **2f**. 1-Cyclohexyl-1*H*-pyrazol-5-amine (0.165 g, 1.0 mmol), 37% formaldehyde (81  $\mu\text{L}$ , 1.1 mmol), DABCO (0.11 g, 1.0 mmol), **1a** (68 mg, 0.38 mmol) and MeOH (0.6 ml). The mixture was separated by FC ( $n\text{-C}_6\text{H}_{14}/\text{EtOAc}$ , 1:1) to give **2l** (0.136 g, 62%) as yellow oil.  $^1\text{H}$  NMR (400 MHz,  $\text{CDCl}_3$ ):  $\delta$  7.28 (s, 1H, Pyr), 5.80 (ddt,  $J = 17.1, 10.2, 6.9$  Hz, 1H,  $\text{CH}=\text{}$ ), 5.44 (s, 1H, Pyr), 5.16–5.07 (m, 2H,  $\text{CH}_2=\text{}$ ), 3.73 (ddd,  $J = 15.1, 9.9, 5.1$  Hz, 1H, CHN), 3.31 (s, 1H, NH), 3.12 (q,  $J = 6.3$  Hz, 2H,  $\text{CH}_2\text{N}$ ), 2.37 (q,  $J = 6.4$  Hz, 2H,  $\text{CH}_2\text{CH}=\text{}$ ), 1.93–1.78 (m, 6H, 3 $\text{CH}_2$ ), 1.68 (d,  $J = 12.5$  Hz, 1H,  $\text{CH}_\text{A}\text{H}_\text{B}$ ), 1.42–1.16 (m, 3H,  $\text{CH}_\text{A}\text{H}_\text{B}$  and  $\text{CH}_2$ ) ppm. Several signals are broaden and splitted, because of dynamic process in the molecule,  $^{13}\text{C}$  NMR (101 MHz,  $\text{CDCl}_3$ ):  $\delta$  146.62, (138.11, 137.98), 135.56, 117.38, 88.33, (55.95, 55.85), 45.03, 33.71, 32.26 2C, 25.78 br. 2C, 25.36 ppm. Anal. Calcd for  $\text{C}_{13}\text{H}_{21}\text{N}_3$  (219.33): C, 71.19; H, 9.65; N, 19.16; found: C, 71.00; H, 9.71; N, 18.99.

#### 4-Bromo-1-cyclohexyl-1H-pyrazol-5-amine

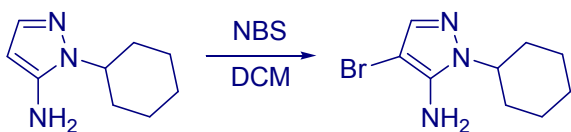

To a chilled to 0 °C solution of 1-cyclohexyl-1H-pyrazol-5-amine (1.39 g, 8.45 mmol) in DCM (25 ml) NBS (1.58 g, 8.87 mmol) was added portionwise. The mixture was stirred for 2 h at rt. The reaction mixture was concentrated, dissolved in Et<sub>2</sub>O/*n*-hexane and stirred with 10% NaOH (6 ml). Organic layer was washed with water and dried with K<sub>2</sub>CO<sub>3</sub> and evaporated that give rise to solid residue which was recrystallized from EtOAc/*n*-hexane mixture to give bromopyrazole (1.47 g, 71%) as beige transparent crystals, m.p. 111-112 °C. <sup>1</sup>H NMR (400 MHz, CDCl<sub>3</sub>): δ 7.30 (br. s, 1H, CH= Pyr), 3.90 (br. s, 1H, CH), 3.62 (br. s, 2H, NH<sub>2</sub>), 1.90-1.73 (br. m, 7H, c-hexyl), 1.36 (br. m, 3H, c-hexyl) ppm. Several signals are broaden and splitted <sup>13</sup>C NMR (101 MHz, CDCl<sub>3</sub>): δ 141.05, (137.51 and 137.40), 78.49, 57.25, 32.13 br. 2C, 25.68 br. 2C, 25.25 br. ppm. Anal. Calcd for C<sub>9</sub>H<sub>14</sub>BrN<sub>3</sub> (244.13): C, 44.28; H, 5.78; N, 17.21; found: C, 44.39; H, 5.84; N, 17.18.

#### 4-Bromo-N-(but-3-en-1-yl)-1-cyclohexyl-1H-pyrazol-5-amine (2m)

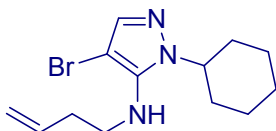

The reaction was performed following the procedure described for **2f**. 4-Bromo-1-cyclohexyl-1H-pyrazol-5-amine (0.794 g, 3.25 mmol), 37% formaldehyde (0.239 ml, 3.25 mmol), DABCO (0.39 g, 3.5 mmol), **1a** (0.21 g, 1.17 mmol) and MeOH (1.8 ml). The mixture was separated by FC (*n*-C<sub>6</sub>H<sub>14</sub>/EtOAc, 5:1) to give **2m** (0.268 g, 28%) as yellow oil and starting bromopyrazol (0.46 g, 58%) as solid. <sup>1</sup>H NMR (400 MHz, CDCl<sub>3</sub>): δ 7.33 (s, 1H, Pyr), 5.81 (ddt, *J* = 17.1, 10.2, 6.8 Hz, 1H, CH=), 5.18-5.11 (m, 2H, CH<sub>2</sub>=), 4.06 (tt, *J* = 10.4, 5.0 Hz, 1H, CHN), 3.14–2.99 (m, 3H, CH<sub>2</sub>N and NH), 2.31 (q, *J* = 6.4 Hz, 2H, CH<sub>2</sub>CH=), 1.93–1.77 (m, 6H, 3CH<sub>2</sub>), 1.69 (d, *J* = 12.4 Hz, 1H, CH<sub>A</sub>H<sub>B</sub>), 1.44–1.16 (m, 3H, CH<sub>A</sub>H<sub>B</sub> and CH<sub>2</sub>) ppm. <sup>13</sup>C NMR (101 MHz, CDCl<sub>3</sub>): δ 143.30, 138.09, 135.36, 117.55, 84.22, 56.84, 48.10, 34.73, 32.72 2C, 25.83 2C, 25.30. Anal. Calcd for C<sub>13</sub>H<sub>20</sub>BrN<sub>3</sub> (298.23): C, 52.36; H, 6.76; N, 14.09; found: C, 52.64; H, 6.77; N, 13.97.

#### Synthesis of **2m** through the bromination of **2l**.

To a solution of *N*-butenylpyrazol **2l** (0.118 g, 0.54 mmol) in DCM (3 ml) cooled in an ice bath NBS (96 mg, 0.54 mmol) was added at 5 °C, after then cooling bath was removed and the

mixture was stirred at rt for 5 min. The progress of the reaction was monitored by TLC (EtOAc/*n*-C<sub>6</sub>H<sub>14</sub>, 1:5). In order to remove succinimide 20% NaOH was added and the mixture was vigorously stirred for 15 min. Organic layer was separated, washed with water, dried with K<sub>2</sub>CO<sub>3</sub>, evaporated and purified by FC to give bromide **2m** (0.148 g, 92%) as yellow oil.

#### ***trans*-N-Allyl-4-phenylbut-3-en-1-amine hydrochloride (2n)**

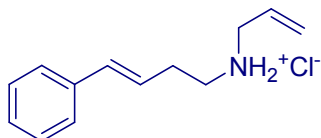

The reaction was performed following the procedure described for **2d**. Allylamine (0.114 g, 0.15 ml, 2.0 mmol), 37% formaldehyde (81  $\mu$ L, 1.1 mmol), **1c** (0.285 g, 1.1 mmol) and MeOH (0.6 ml), the reaction mixture was stirred for 30 min at rt, after then evaporated under reduced pressure. The product was extracted with *n*-hexane, the combined extracts were washed with 20% NaOH, dried with K<sub>2</sub>CO<sub>3</sub>, evaporated. The residue was taken up in Et<sub>2</sub>O (4 ml) and treated with HCl 3M in Et<sub>2</sub>O (0.4 ml, 1.2 mmol), the separated oil gradually crystallized that give **2n** (0.182 g, 74%) as white powder, m.p. 168-169 °C. <sup>1</sup>H NMR (400 MHz, CDCl<sub>3</sub>):  $\delta$  9.76 (s, 2H, NH<sub>2</sub>), 7.48–7.12 (m, 5H, Ph), 6.51 (dd, *J* = 15.8, 3.5 Hz, 1H, PhCH=), 6.29–5.98 (m, 2H, CH=allyl and CH=CHPh), 5.62–5.39 (m, 2H, CH<sub>2</sub>=), 3.64-3.61 (m, 2H, CH<sub>2</sub>N<sub>allyl</sub>), 3.04 (s, 2H, CH<sub>2</sub>N), 2.82 (s, 2H, CH<sub>2</sub>CH=) ppm. <sup>13</sup>C NMR (101 MHz, CDCl<sub>3</sub>):  $\delta$  136.70, 133.60, 128.61 2C, 127.77, 127.65, 126.34 2C, 124.19, 123.92, 49.68, 45.97, 29.54 ppm. Anal. Calcd for C<sub>13</sub>H<sub>18</sub>ClN (223.74): C, 69.79; H, 8.11; N, 6.26; found: C, 69.64; H, 7.94; N, 6.34.

#### **(*R,E*)-4-Phenyl-N-(1-phenylethyl)but-3-en-1-amine (2o)**

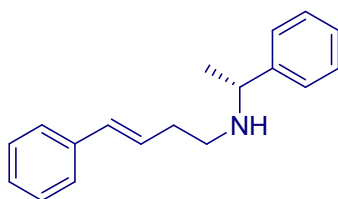

#### **and a mixture of (*2S*)- and (*2R*)-2-phenyl-N-[(*1R*)-1-phenylethyl]-3-buten-1-amines (2p)**

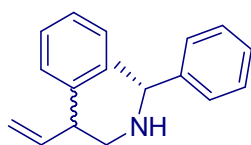

To a solution of (*R*)-1-phenylethylamine (0.121 g, 0.128 ml, 1.0 mmol) in MeOH (0.8 ml) was added 37% formaldehyde (81  $\mu$ L, 1.1 mmol) and DABCO (0.11 g, 1.0 mmol) the mixture was

stirred for 20 min at rt, after then cooled to -20 °C followed by the addition of adduct **1c** (0.285 g, 1.1 mmol) with stirring for 1 h. All volatiles were removed under reduced pressure and the residue was treated with 10% NaOH, extracted with *n*-hexane, the combined extracts were washed with 3% NaOH, dried with K<sub>2</sub>CO<sub>3</sub>, evaporated and the residual oil was subjected to chromatography (EtOAc) that afford in upper fraction a mixture of diastereomers (2.5:1) **2p** (0.136 g, 54%) as oil, R<sub>f</sub> = 0.6 (EtOAc) and in lower fraction amine **2o** (55 mg, 22%) as oil, R<sub>f</sub> = 0.39 (EtOAc).

**2o**: <sup>1</sup>H NMR (400 MHz, CDCl<sub>3</sub>): δ 7.38-7.22 (m, 10H, 2Ph), 6.48 (d, *J* = 15.9 Hz, 1H, PhCH=), 6.19 (dt, *J* = 15.9, 7.0 Hz, 1H, CH<sub>2</sub>CH=), 3.84 (q, *J* = 6.6 Hz, 1H, MeCH), 2.68 (ddd, *J* = 18.2, 11.5, 5.7 Hz, 1H, CH<sub>A</sub>H<sub>B</sub>N), 2.64 (ddd, *J* = 18.2, 11.4, 5.8 Hz, 1H CH<sub>A</sub>H<sub>B</sub>N), 2.43 (q, *J* = 6.7 Hz, 2H), 1.98 (br. s, 1H, NH), 1.41 (d, *J* = 6.6 Hz, 3H, Me) ppm. <sup>13</sup>C NMR (101 MHz, CDCl<sub>3</sub>): 145.57, 137.57, 131.66, 128.57 br. 4C, 128.29, 127.10 br. 4C, 126.71 br., 126.10 br., (58.44, 58.36), 47.12, 33.67, (24.61, 24.37, 24.12) ppm. HRMS (ESI): calcd for C<sub>18</sub>H<sub>21</sub>N [M+H]<sup>+</sup> 252.1747; found: 252.1751.

**2p**: <sup>1</sup>H NMR (400 MHz, CDCl<sub>3</sub>): δ 7.51-7.11 (m, 10H, 2Ph), 6.12-5.79 (m, 1H, CH=) 5.25-5.00 (m, 2H, CH<sub>2</sub>=), 3.93-3.70 (m, 1H, PhCHN), 3.67-3.41 (m, 1H, PhCH), 2.92-2.68 (m, 2H, CH<sub>2</sub>), 1.65 (br. s, 1H, NH), 1.38-1.35 (m, 3H, Me) ppm. HRMS (ESI): calcd for C<sub>18</sub>H<sub>21</sub>N [M+H]<sup>+</sup> 252.1747; found: 252.1751.

## References:

- <sup>1</sup> L. I. Zakharkin, V. I. Stanko, *Izv. Acad. Nauk SSSR, Ser. Khim.* 1960, 1896, (Chem. Abstr. 1961, 55, 15337d).
- <sup>2</sup> Yu. N. Bubnov, I. V. Zhun', E. V. Klimkina, A. V. Ignatenko, Z. A. Starikova, *Eur. J. Org. Chem.* 2000, 3323.
- <sup>3</sup> N. Yu. Kuznetsov, R. M. Tikhov, T. V. Strelkova, Yu. N. Bubnov, *Org. Lett.*, 2018, **20**, 3549.
- <sup>4</sup> Yu. N. Bubnov, N. Yu. Kuznetsov, F. V. Pastukhov, V. V. Kublitsky, *Eur. J. Org. Chem.* 2005, 4633.
- <sup>5</sup> V. S. Bogdanov, T. K. Baryshnikova, V. G. Kiselev, B. M. Mikhailov, *Zh. Obshch. Khim.*, 1971, **41**, 1533 (in Russian).
- <sup>6</sup> N. Yu. Kuznetsov, R. M. Tikhov, I. A. Godovikov, V. N. Khrustalev, Yu. N. Bubnov, *Org. Biomol. Chem.*, 2016, **14**, 4283.
- <sup>7</sup> T. Matsuo, T. Yoshida, A. Fujii, K. Kawahara and S. Hirota, *Organometallics*, 2013, **32**, 5313.
- <sup>8</sup> K. Csatajová, S. G. Davies, A. M. Fletcher, J. G. Ford, D. J. Klauber, P. M. Roberts and J. E. Thomson, *J. Org. Chem.*, 2014, **79**, 10932.
- <sup>9</sup> N. Zill, A. Schoenfelder, N. Girard, M. Taddei and A. Mann, *J. Org. Chem.*, 2012, **77**, 2246.
- <sup>10</sup> C. Agami, F. Couty, M. Poursoulis and J. Vaissermann, *Tetrahedron*, 1992, **48**, 431.
- <sup>11</sup> J. Zheng, L. Huang, C. Huang, W. Wu and H. Jiang, *J. Org. Chem.*, 2015, **80**, 1235.
- <sup>12</sup> D. Anastasiou, E. M. Campi, H. Chaouk and W. R. Jackson, *Tetrahedron*, 1992, **48**, 7467.

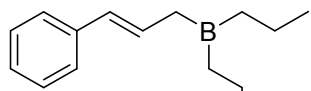

$^1\text{H}$ ,  $\text{CDCl}_3$ , 400 MHz

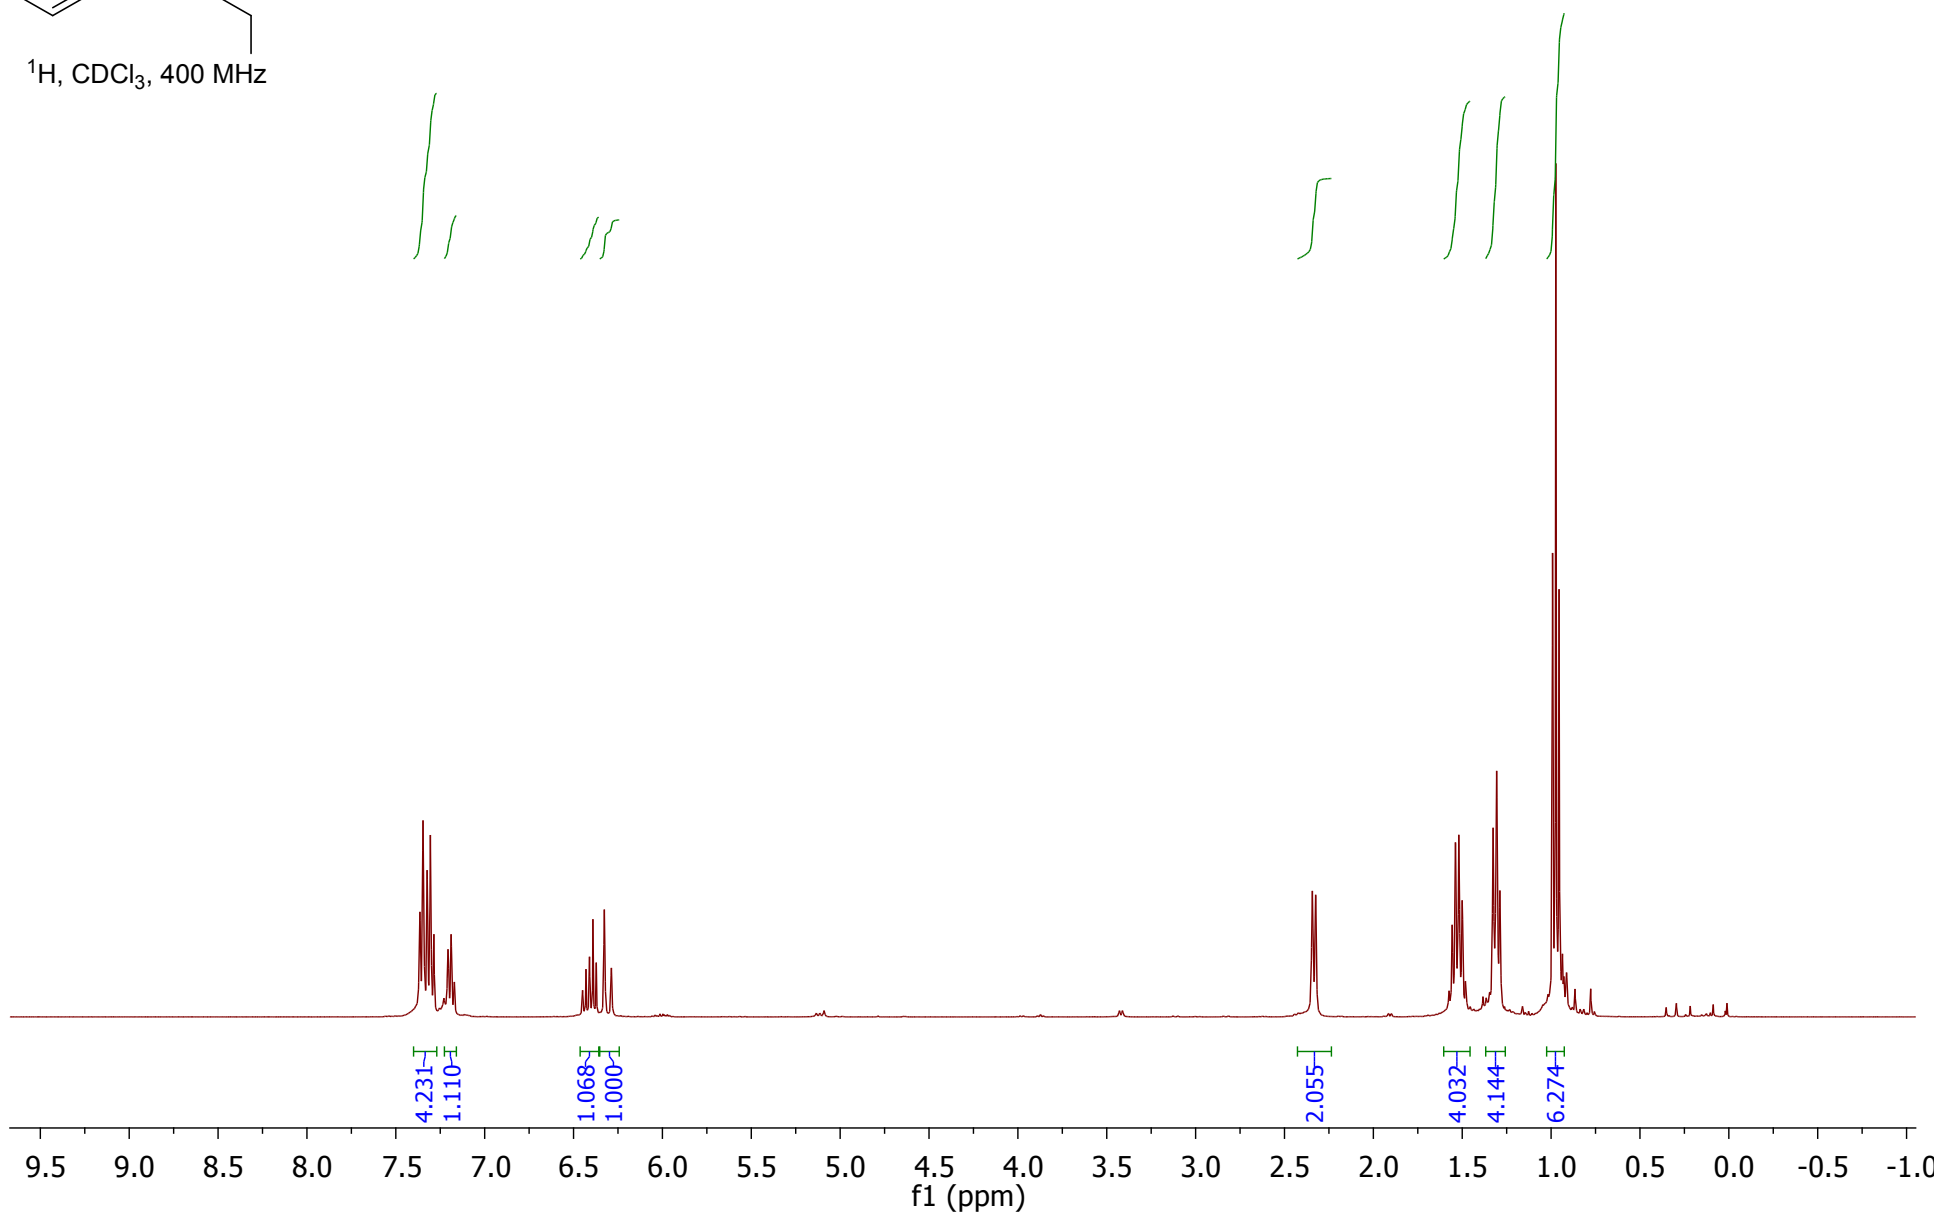

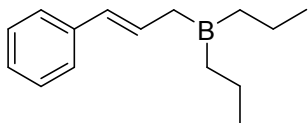

$^{11}\text{B}$ ,  $\text{CDCl}_3$ , 128 MHz

— 85.2407

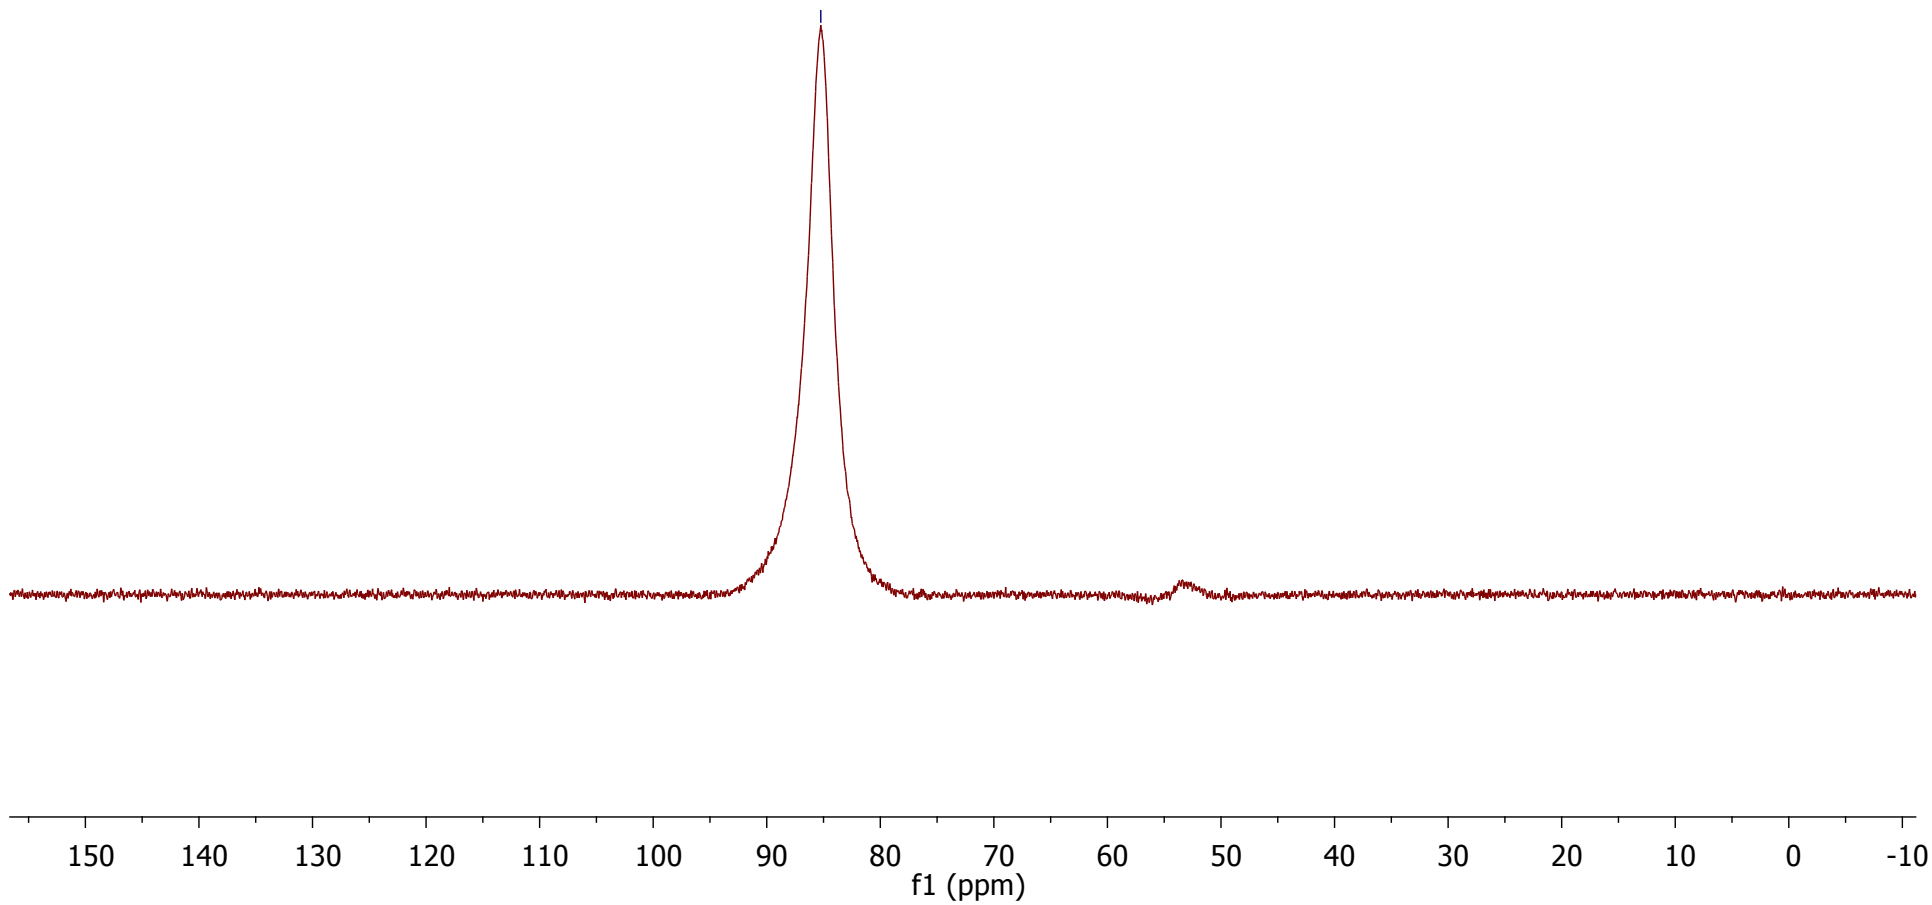

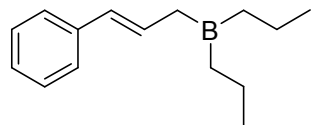

$^{13}\text{C}$ ,  $\text{CDCl}_3$ , 101 MHz

— 138.5881  
└─ 129.5948  
└─ 128.5852  
└─ 128.3141  
└─ 126.5048  
└─ 125.7734

└─ 77.4774  
└─ 77.1596  
└─ 76.8425

└─ 33.8763  
└─ 31.1830

└─ 18.0168  
└─ 17.6385

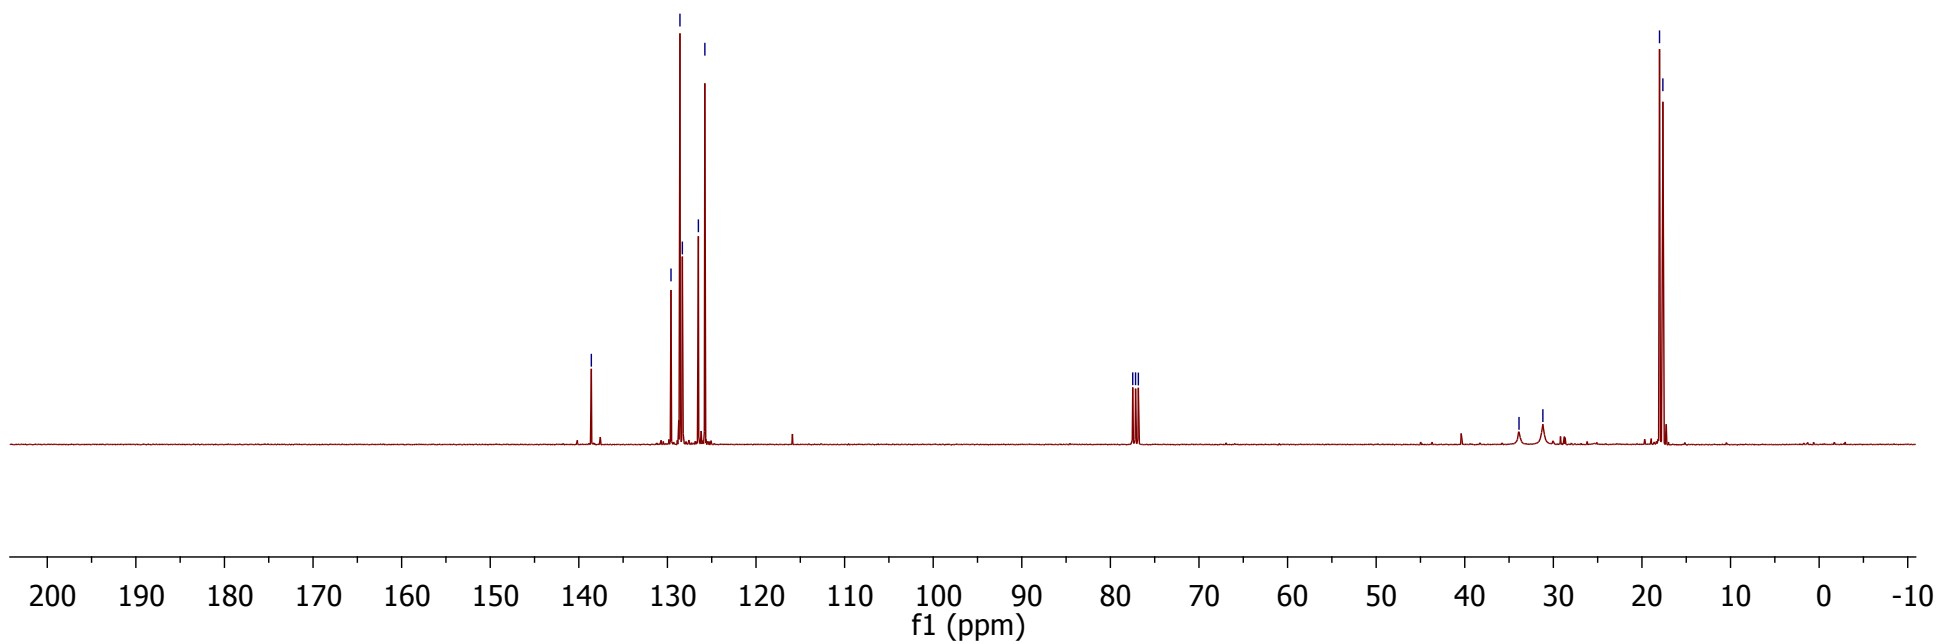



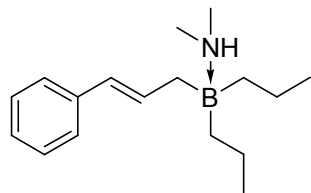

$^1\text{H}$ ,  $\text{CDCl}_3$ , 400 MHz

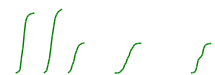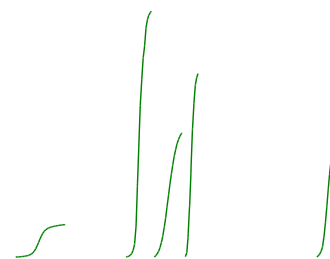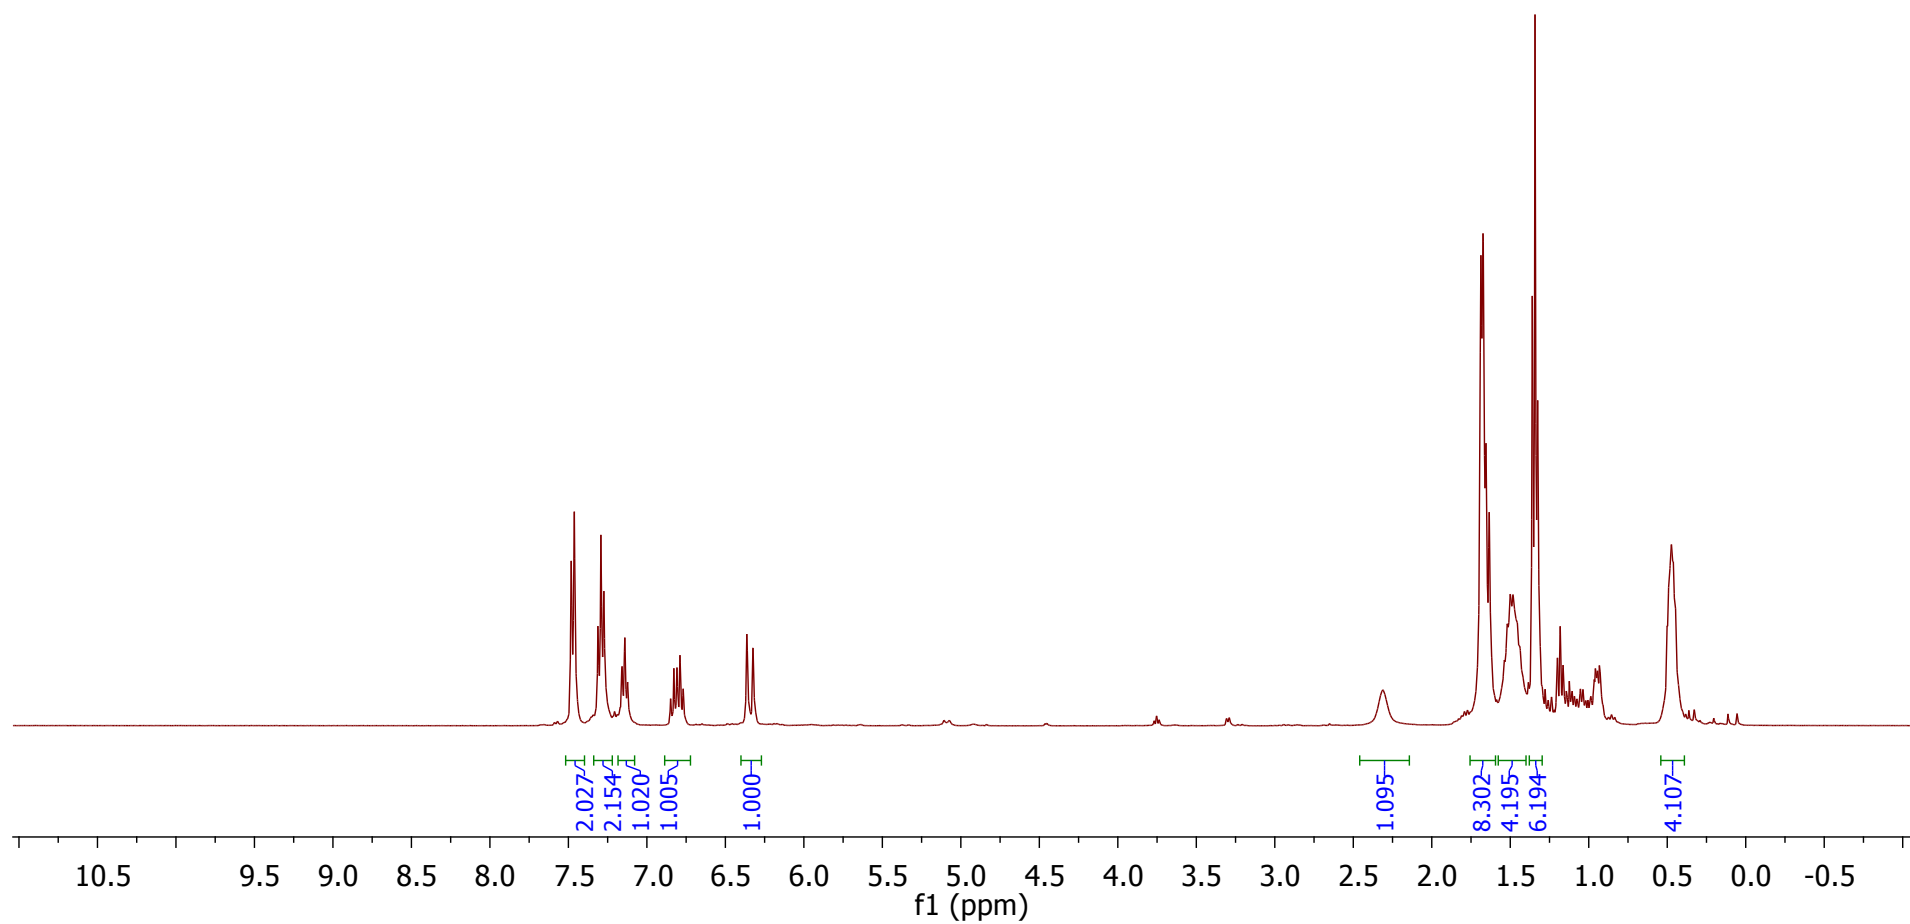

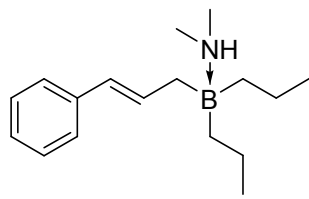

$^{11}\text{B}$ ,  $\text{CDCl}_3$ , 128 MHz

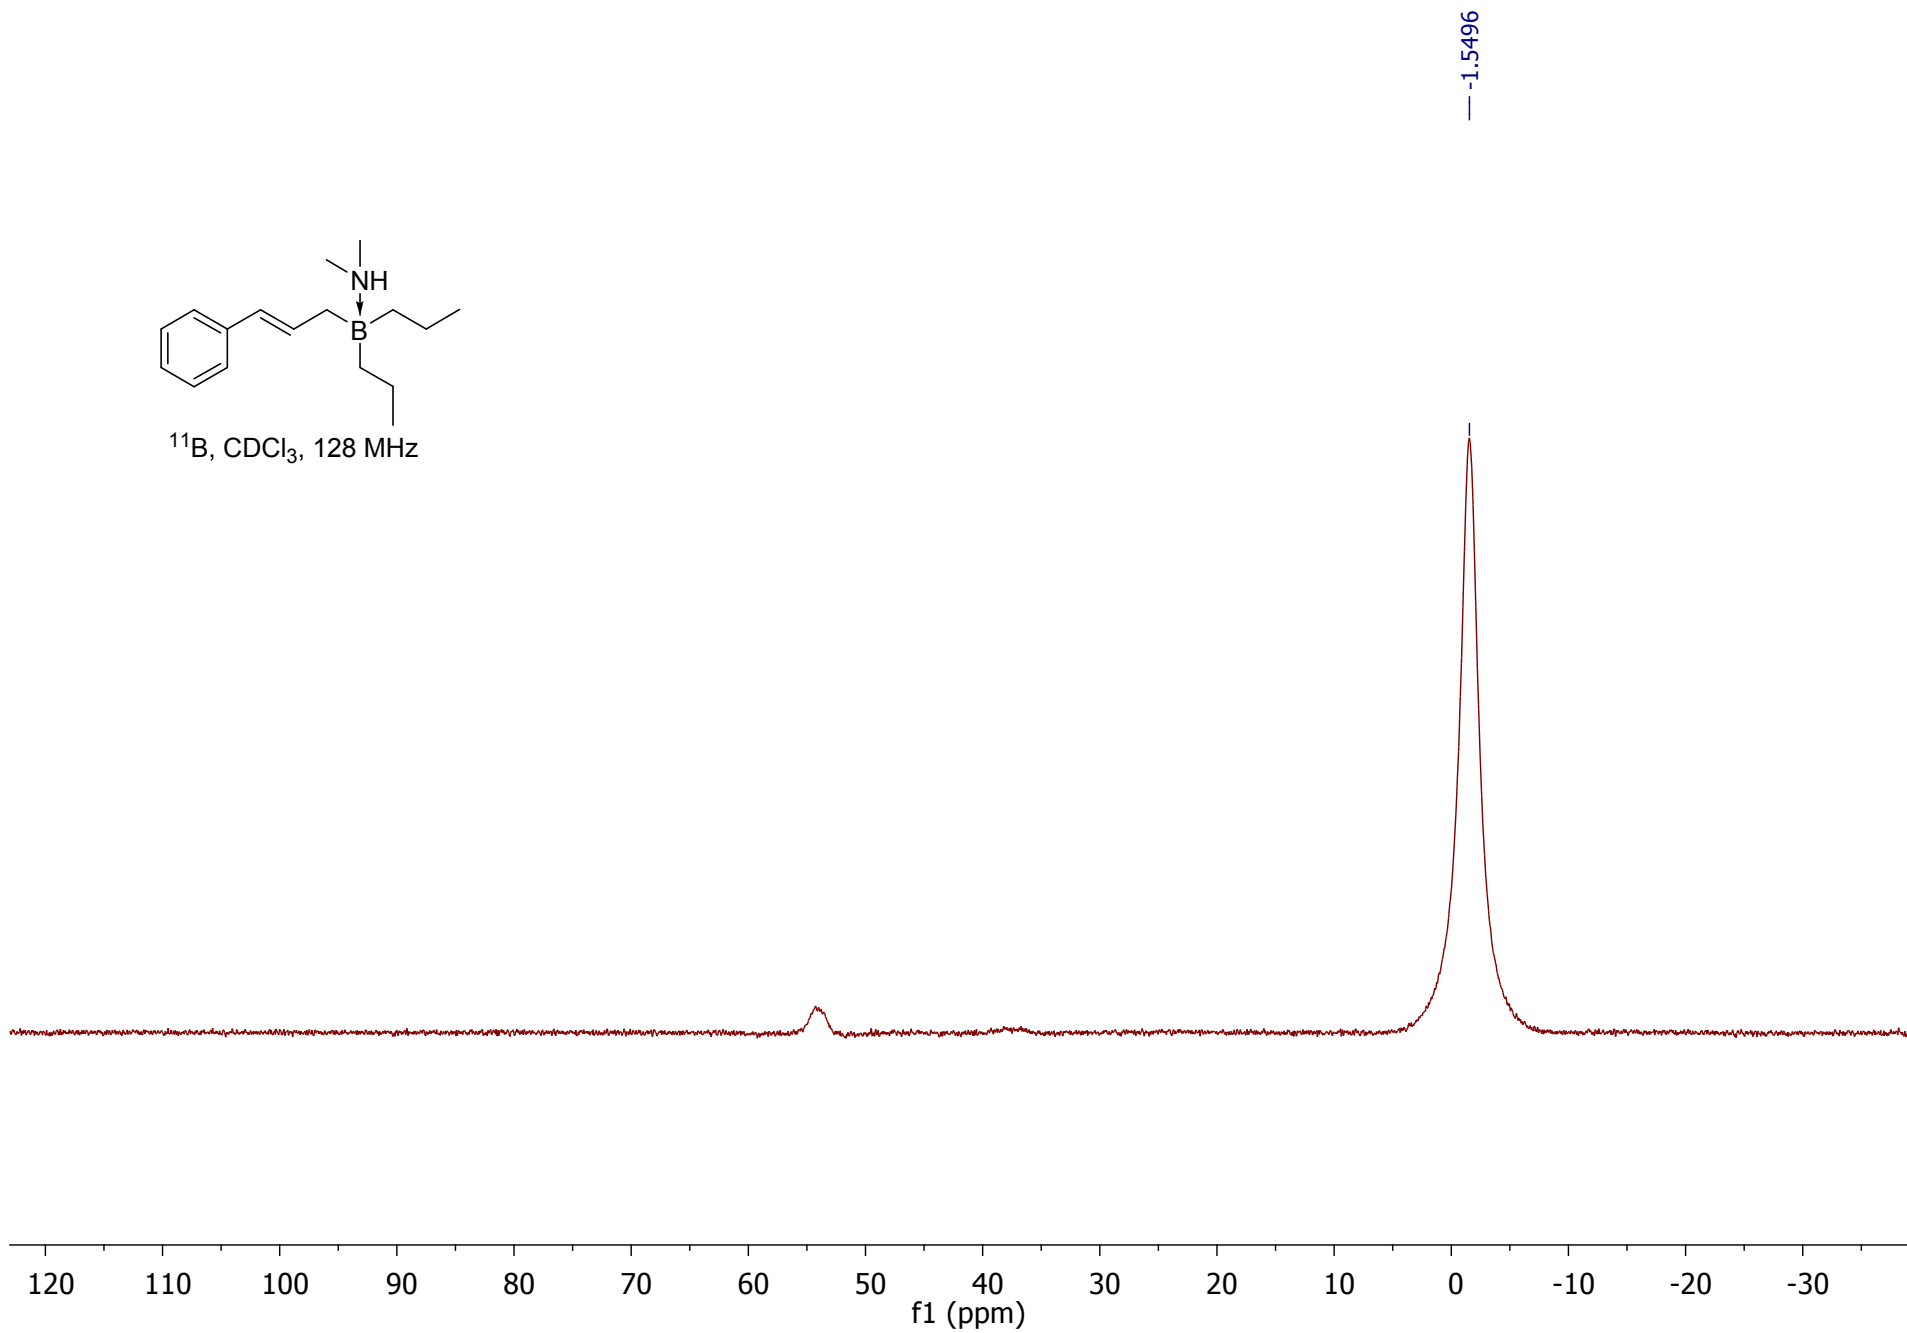

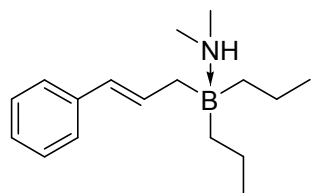

$^{13}\text{C}$ ,  $\text{CDCl}_3$ , 101 MHz

139.7799  
137.4785  
128.8910  
126.0557  
126.0298  
125.6450

36.9445  
29.2570  
25.7969  
20.5860  
19.6764

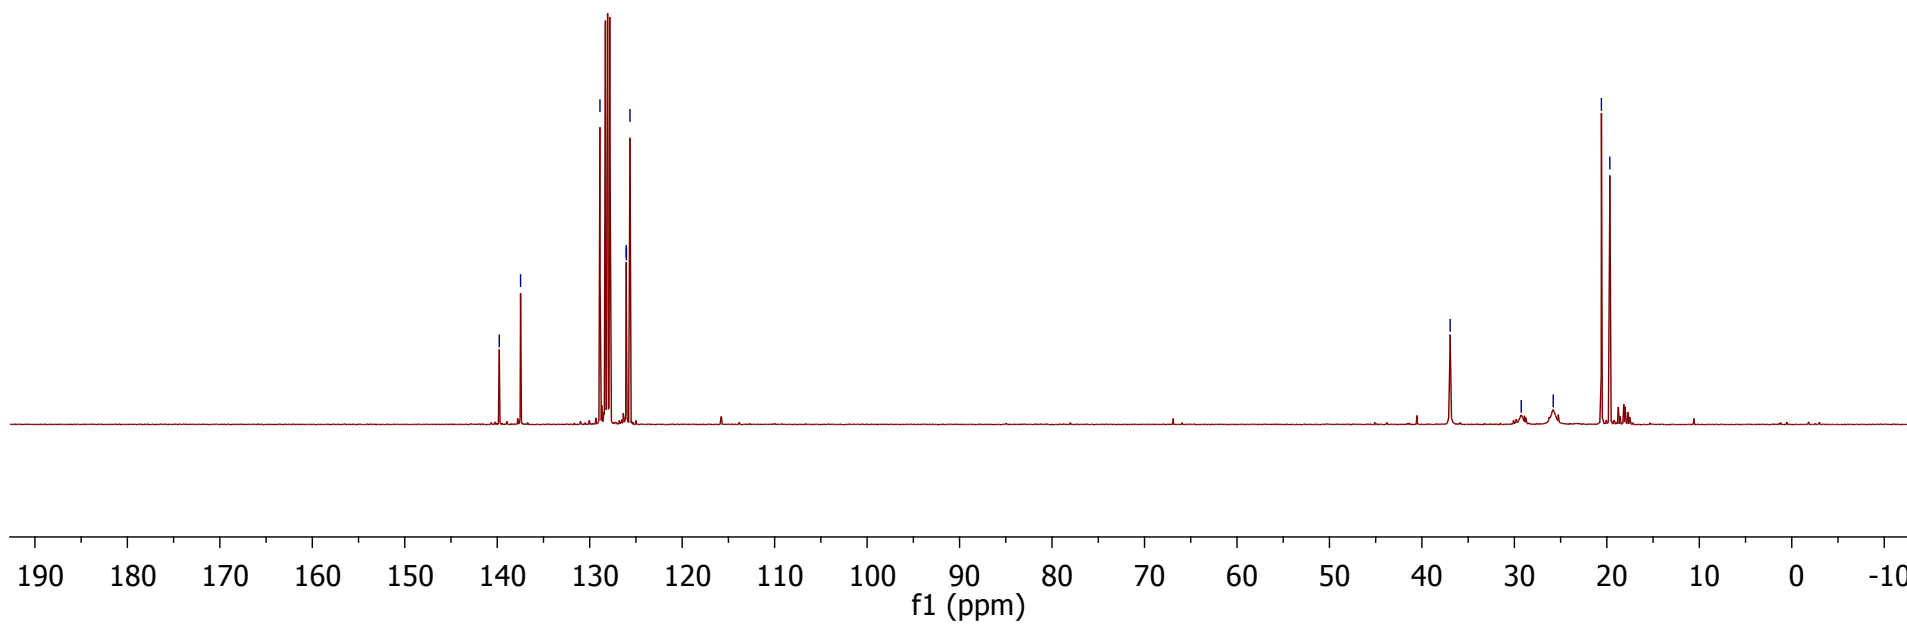

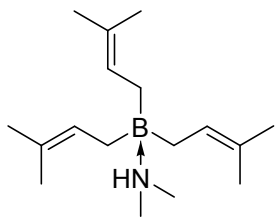

<sup>1</sup>H, C<sub>6</sub>D<sub>6</sub>, 400 MHz

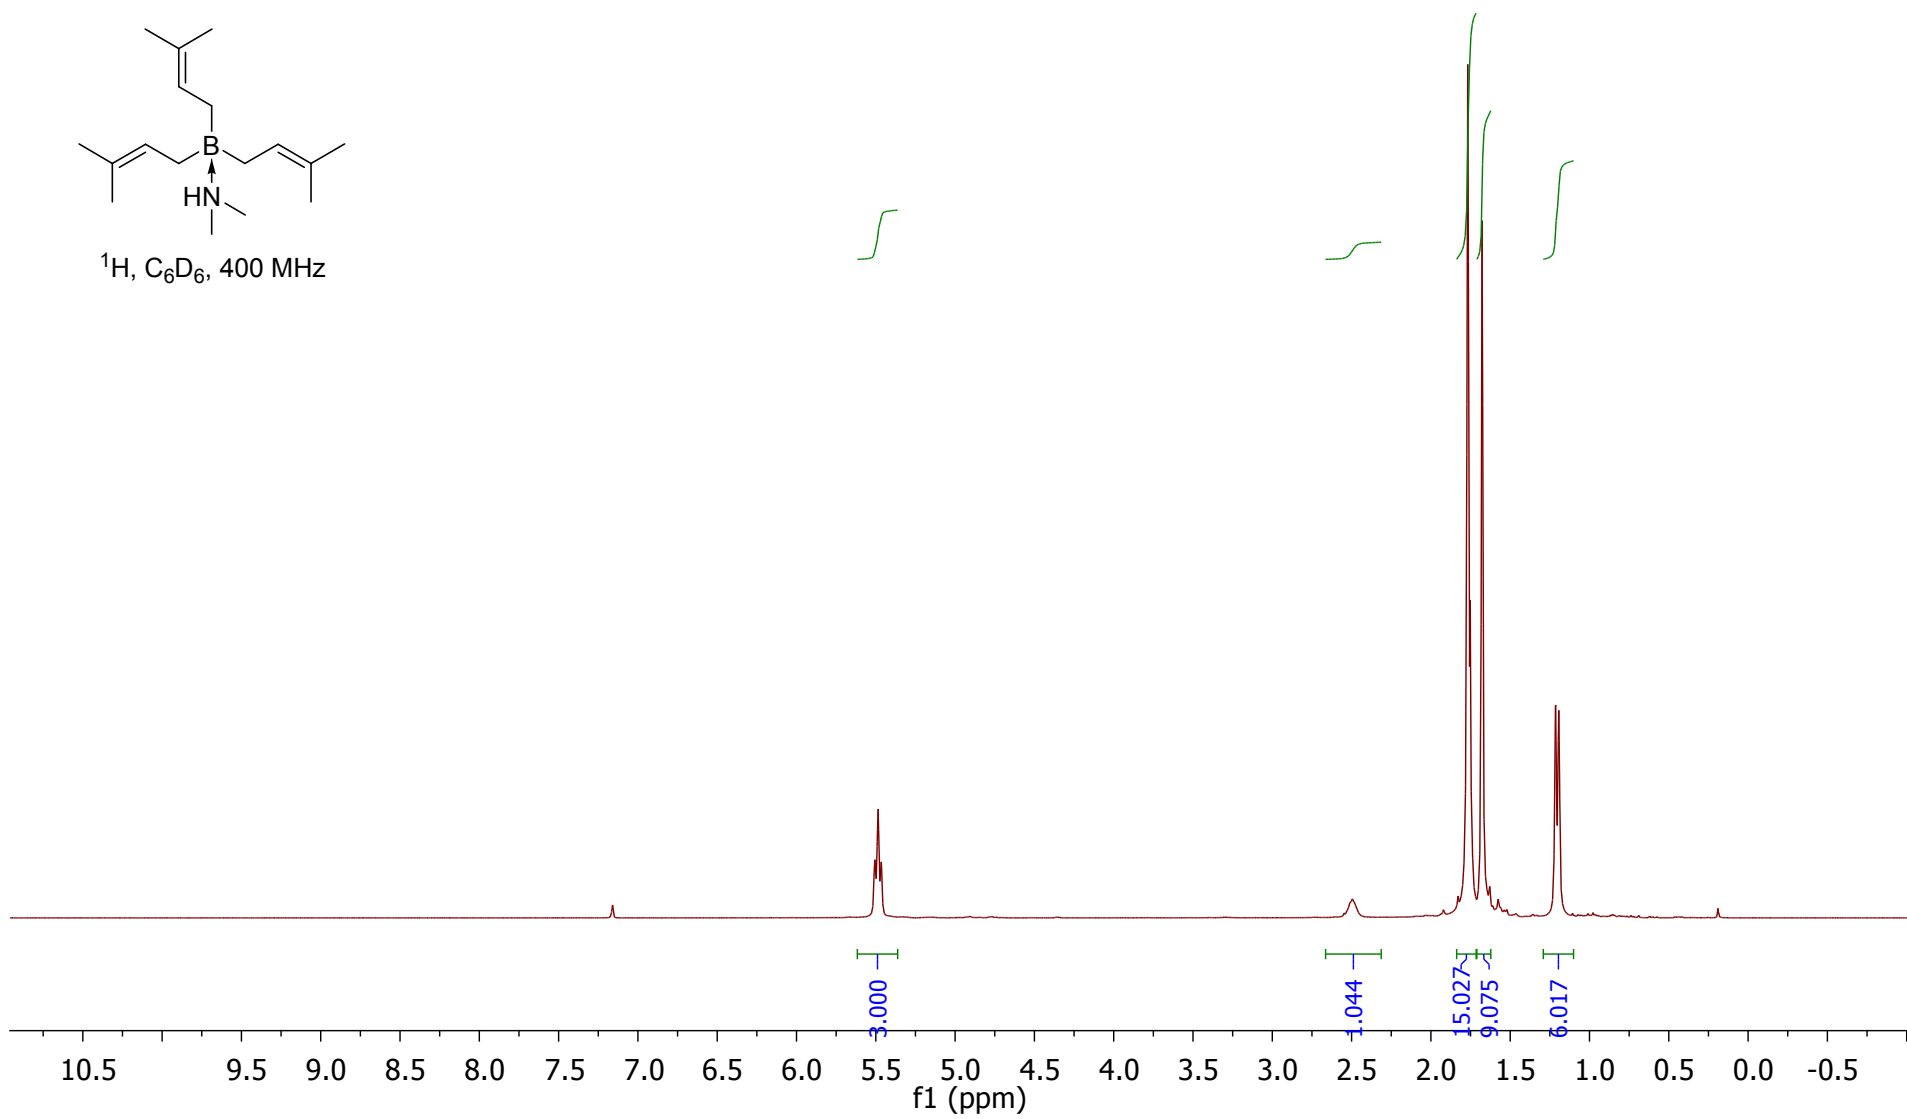

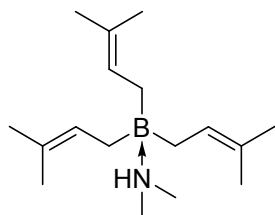

$^{11}\text{B}$ ,  $\text{C}_6\text{D}_6$ , 128 MHz

-1.4718

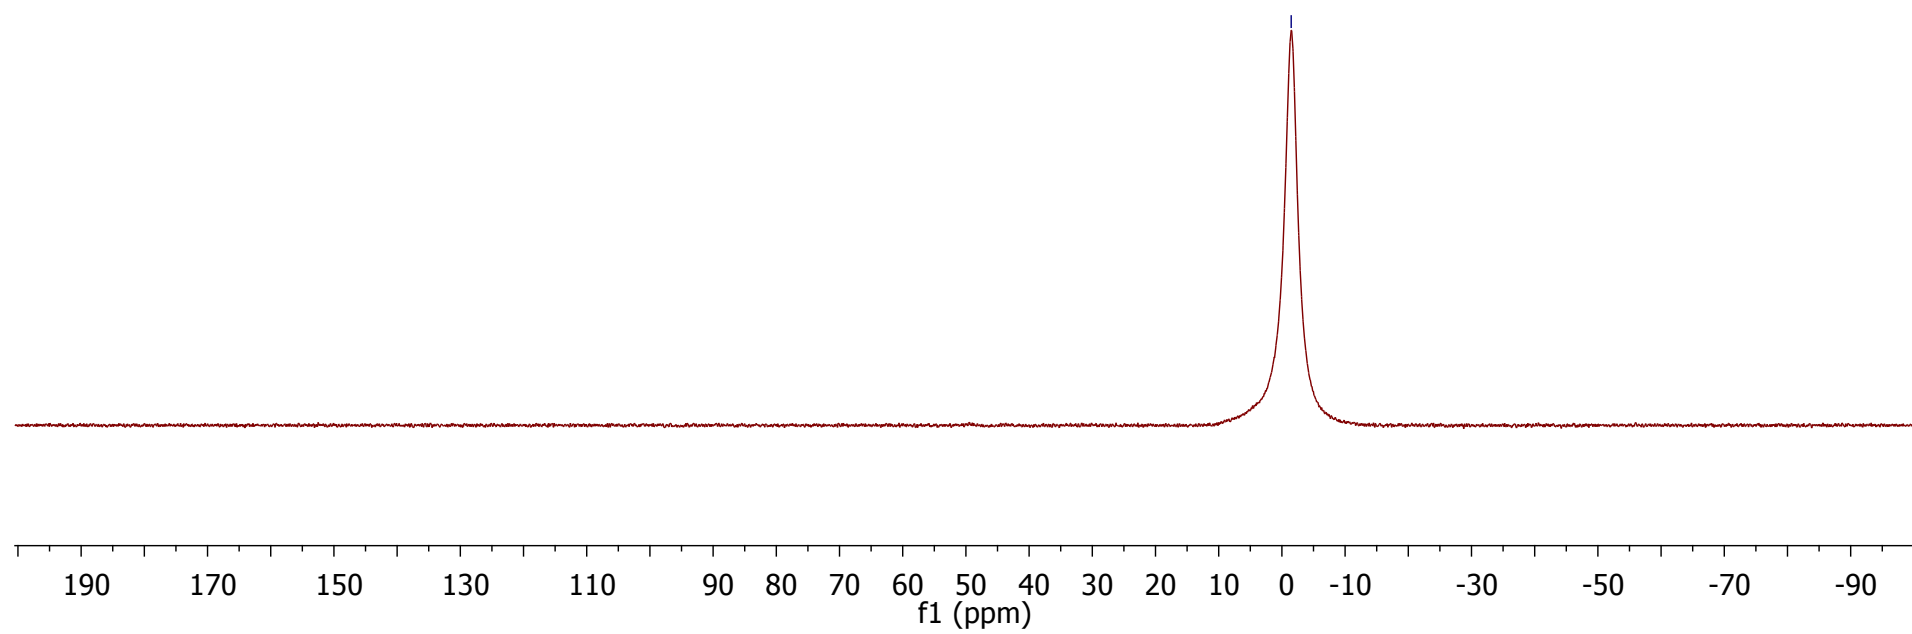

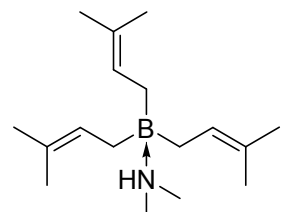

<sup>13</sup>C, C<sub>6</sub>D<sub>6</sub>, 101 MHz

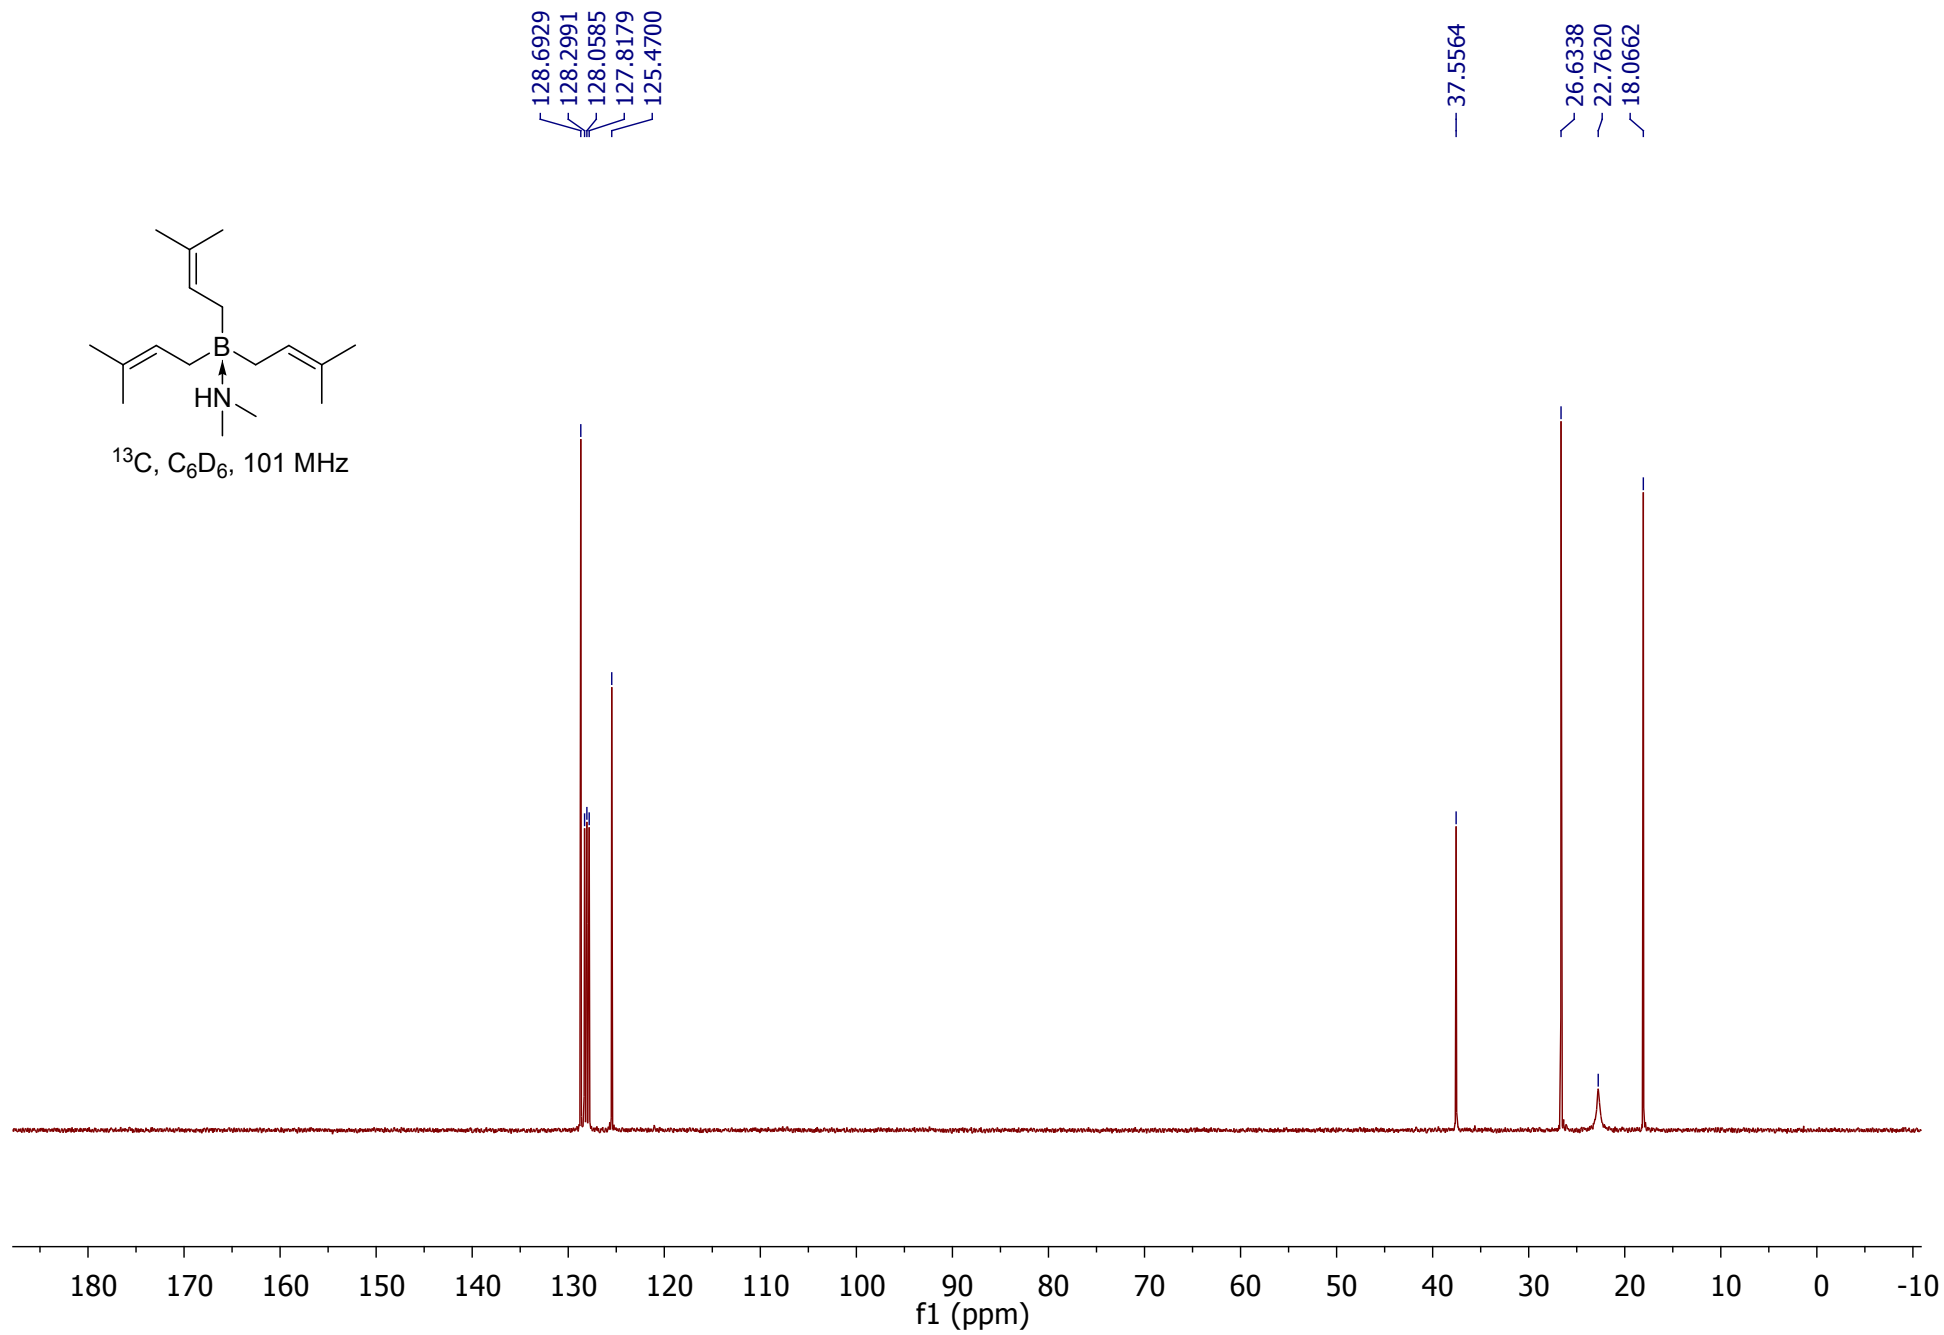

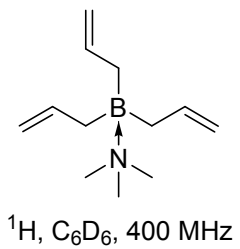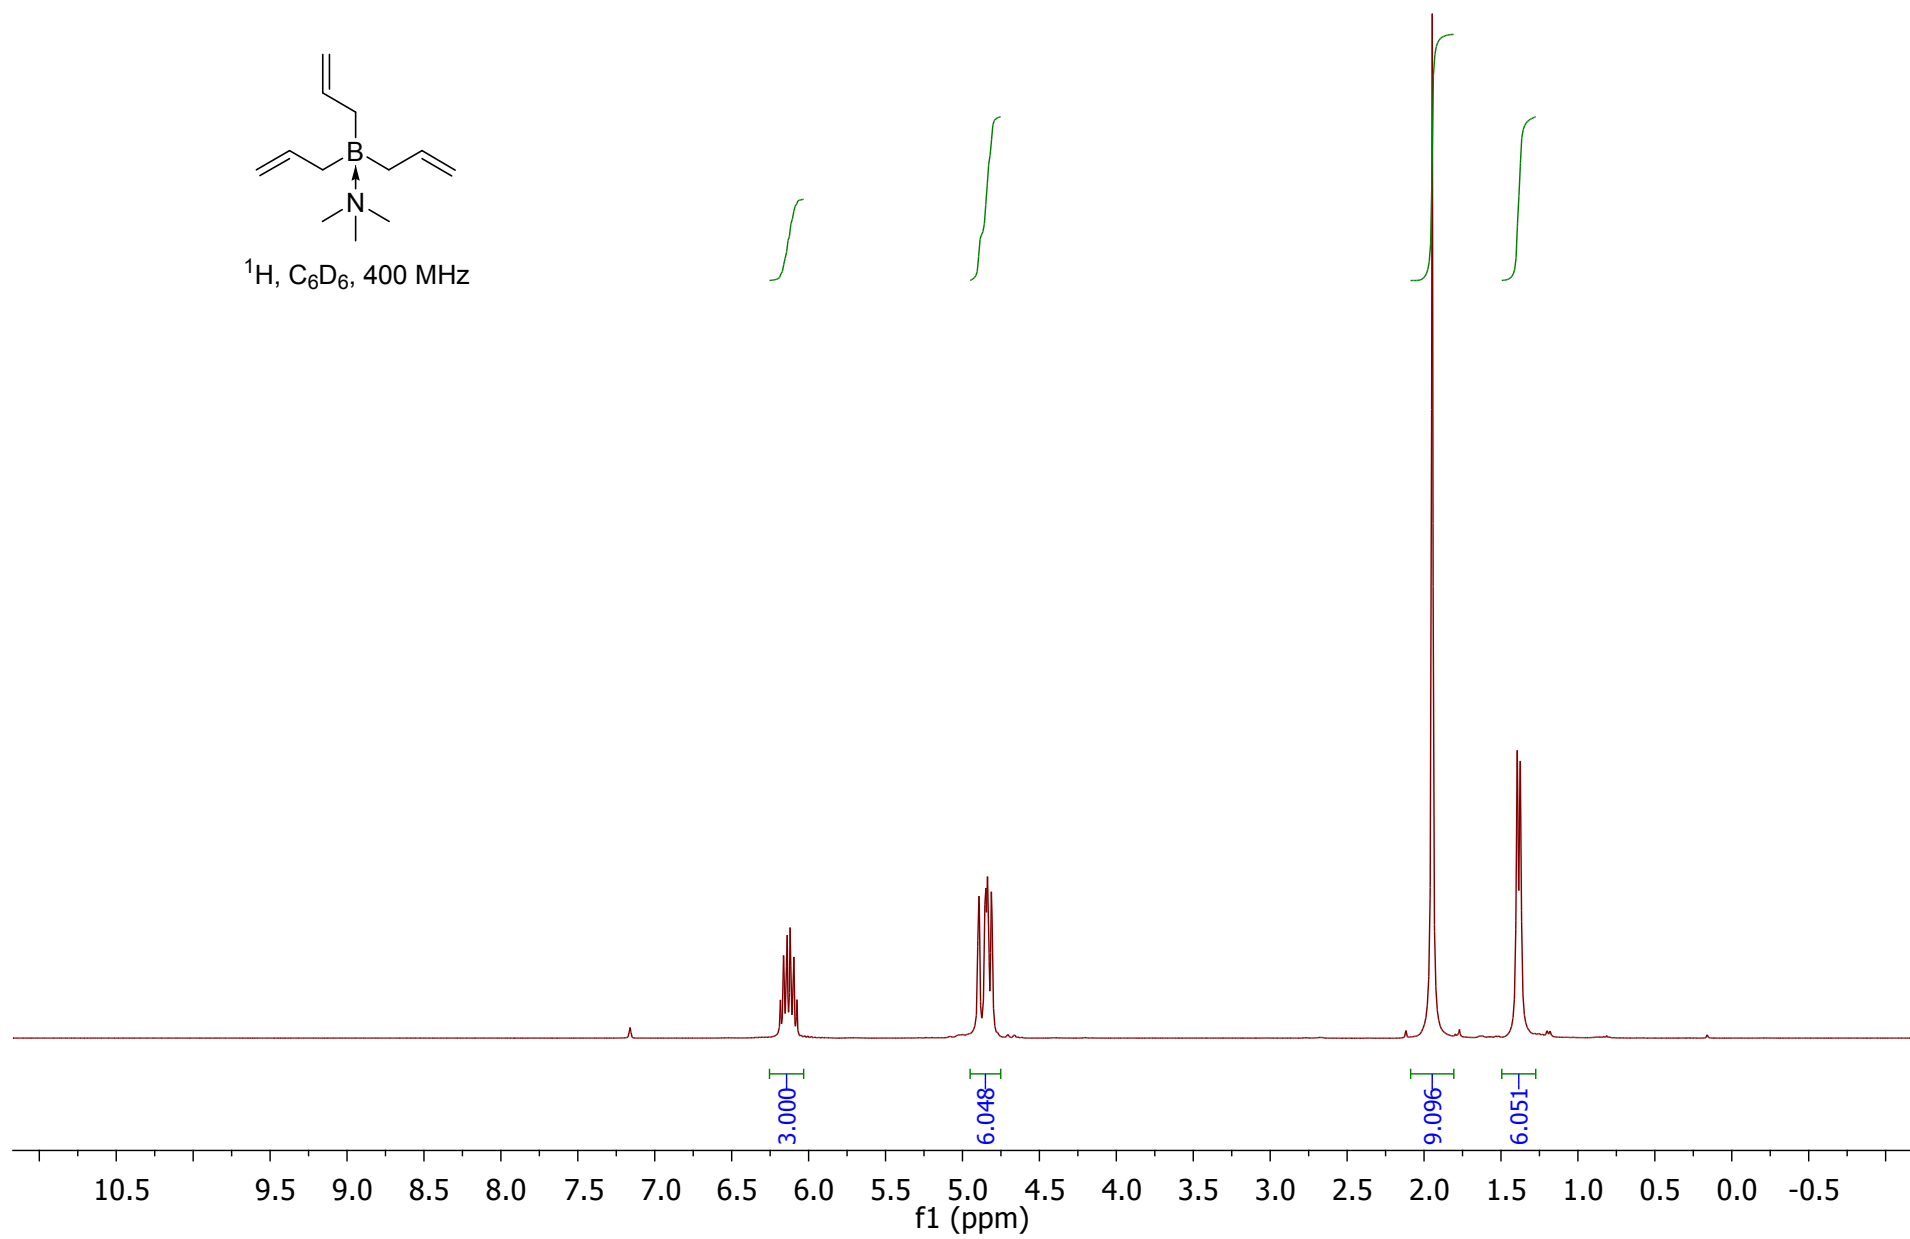

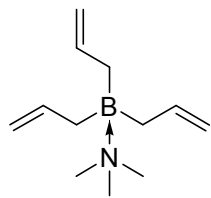

<sup>11</sup>B, C<sub>6</sub>D<sub>6</sub>, 128 MHz

— 0.9803

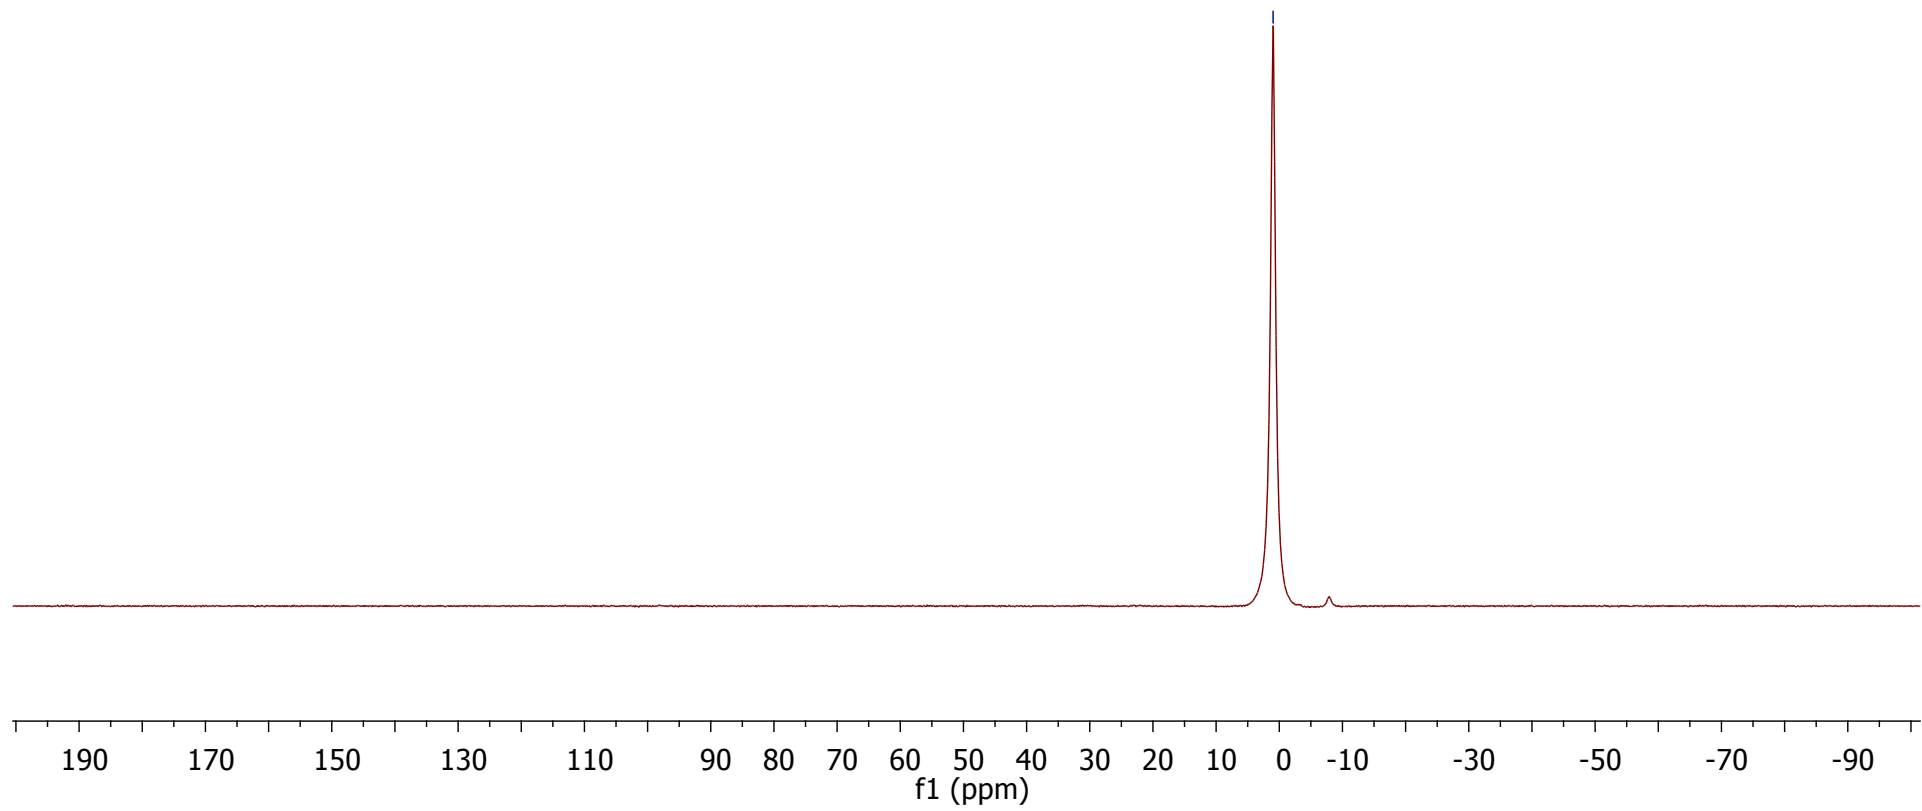



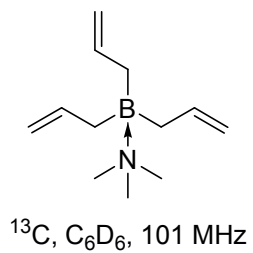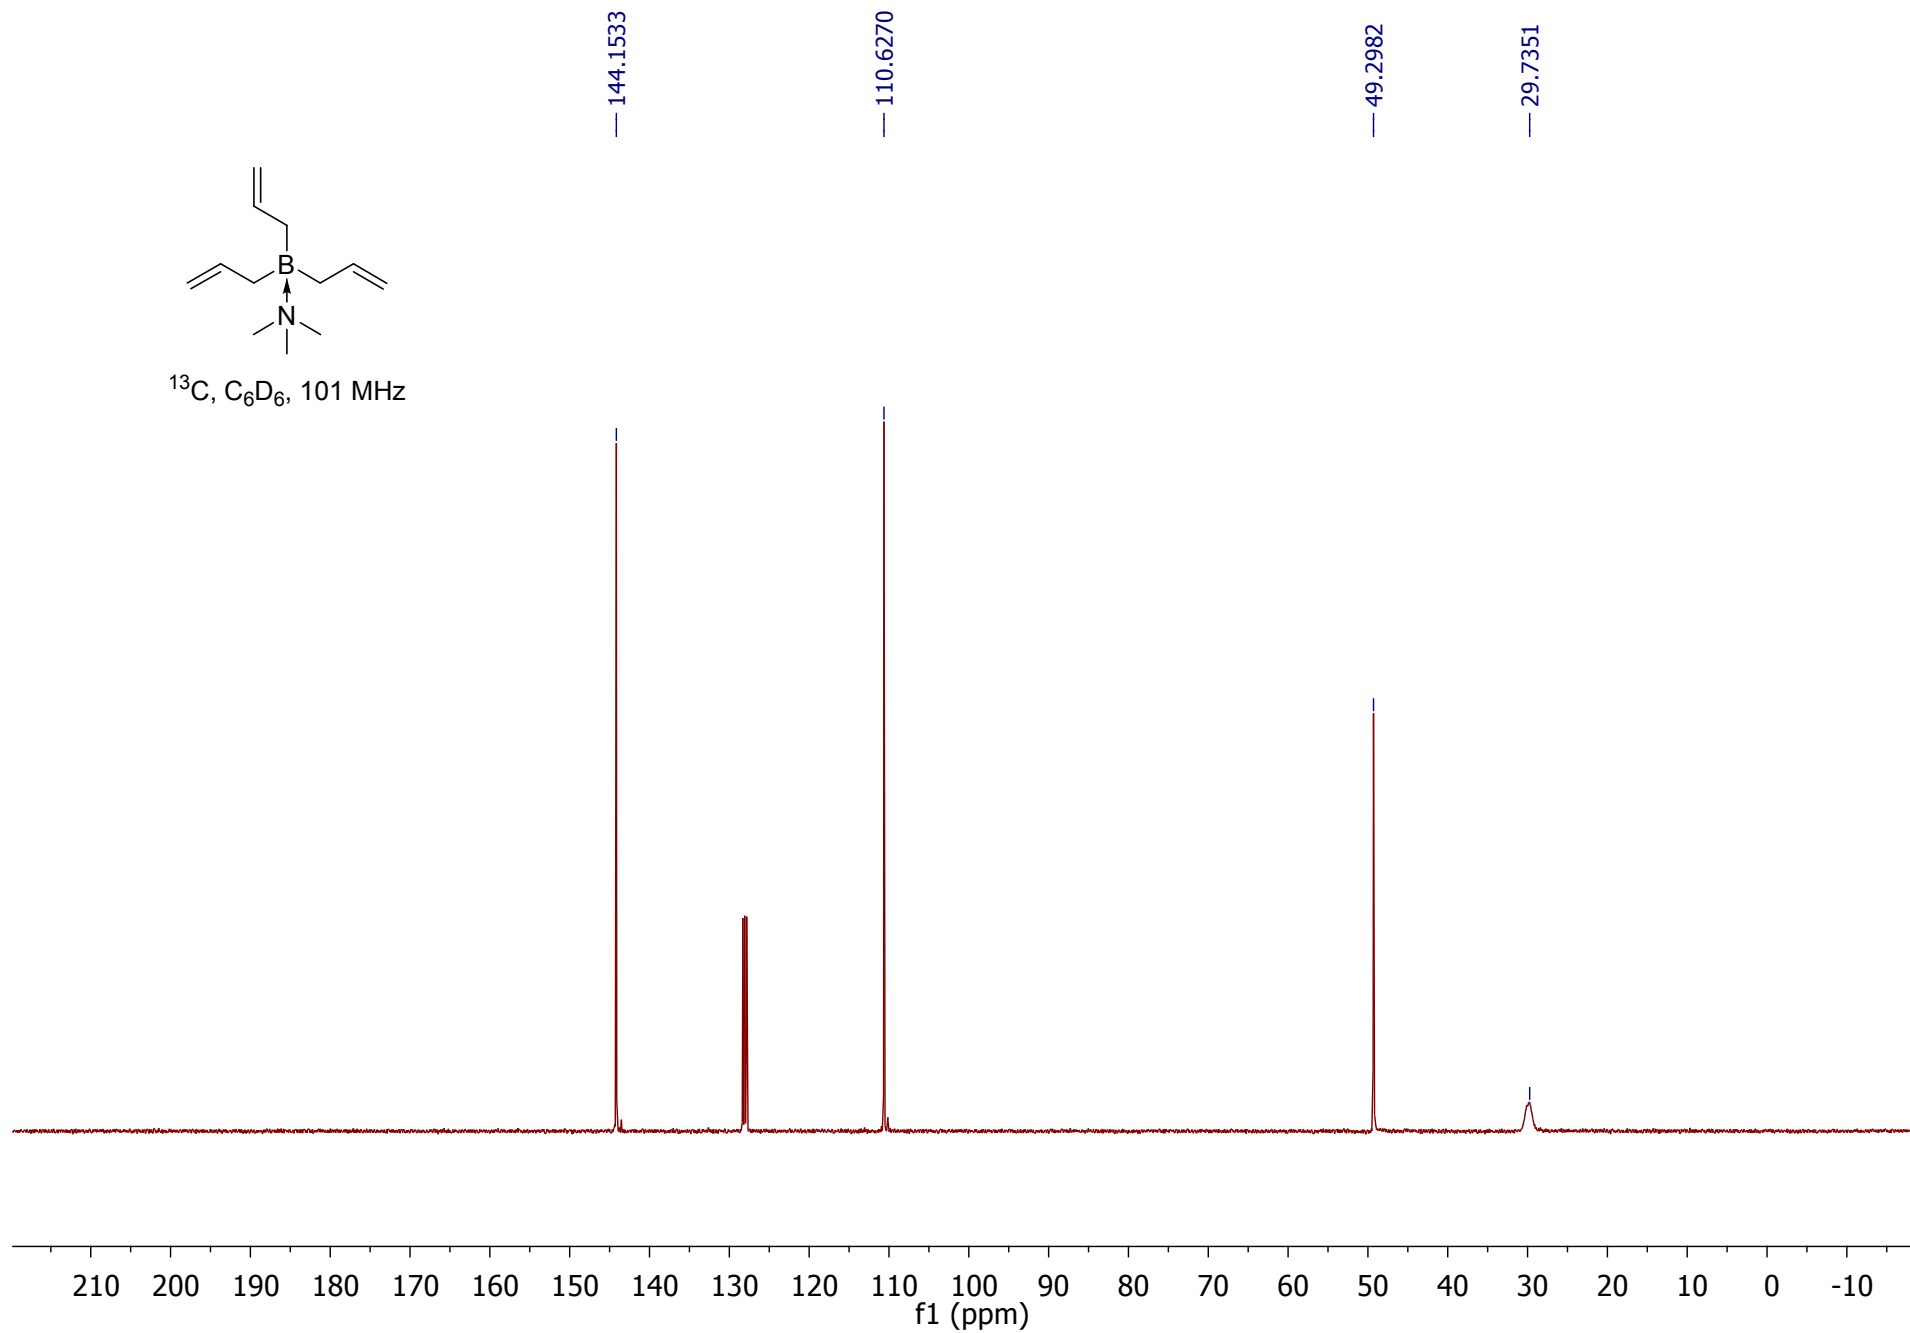

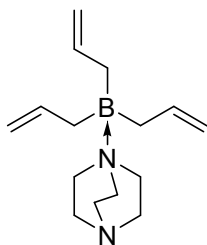

$^1\text{H}$ ,  $\text{CDCl}_3$ , 400 MHz

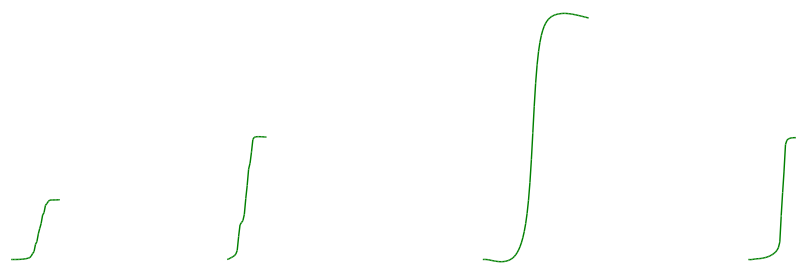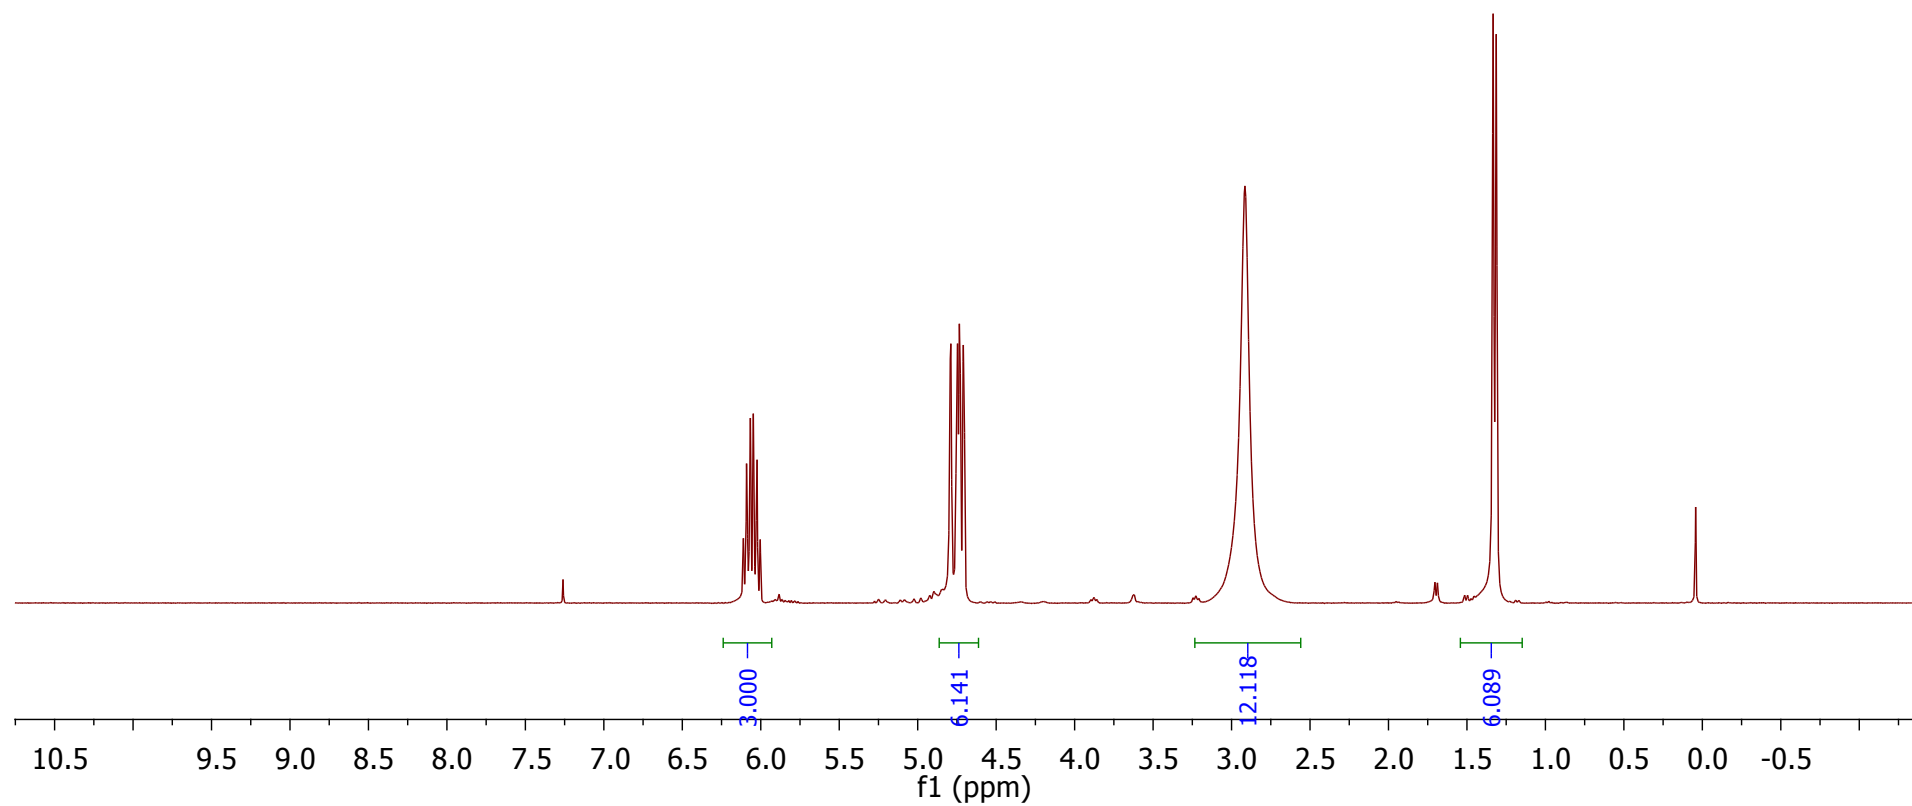

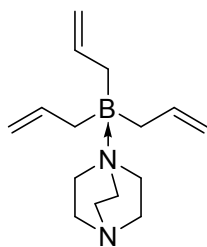

$^{11}\text{B}$ ,  $\text{CDCl}_3$ , 128 MHz

— 0.7448

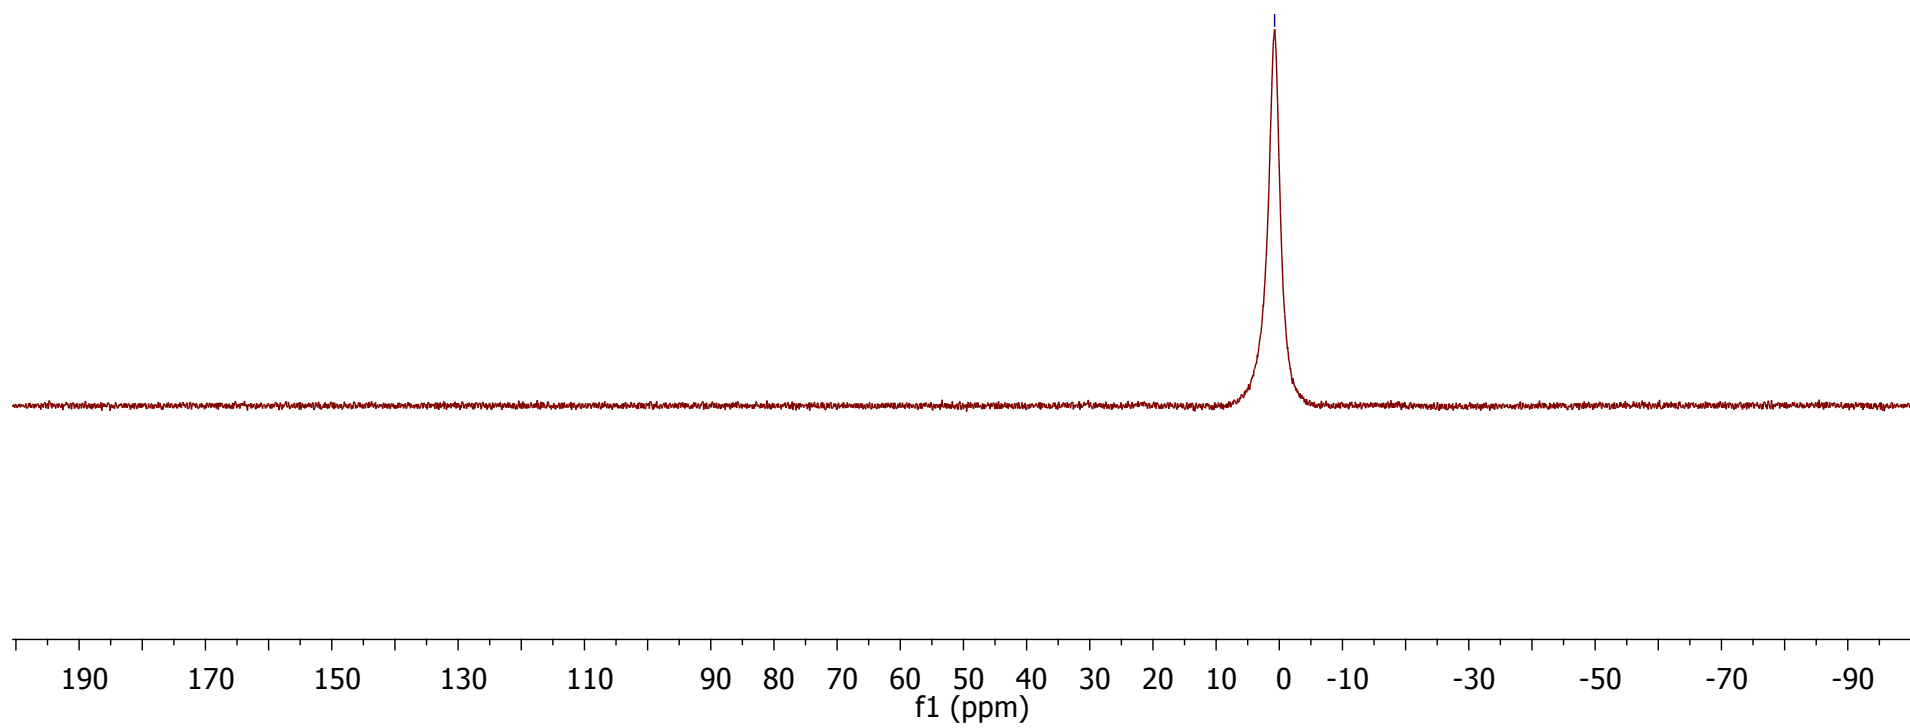

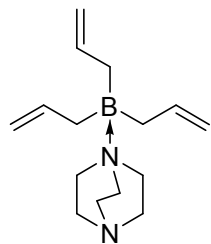

$^{13}\text{C}$ ,  $\text{CDCl}_3$ , 101 MHz

— 143.8074

— 110.7112

77.4766  
77.1630  
76.8422

— 46.2617

— 29.1048

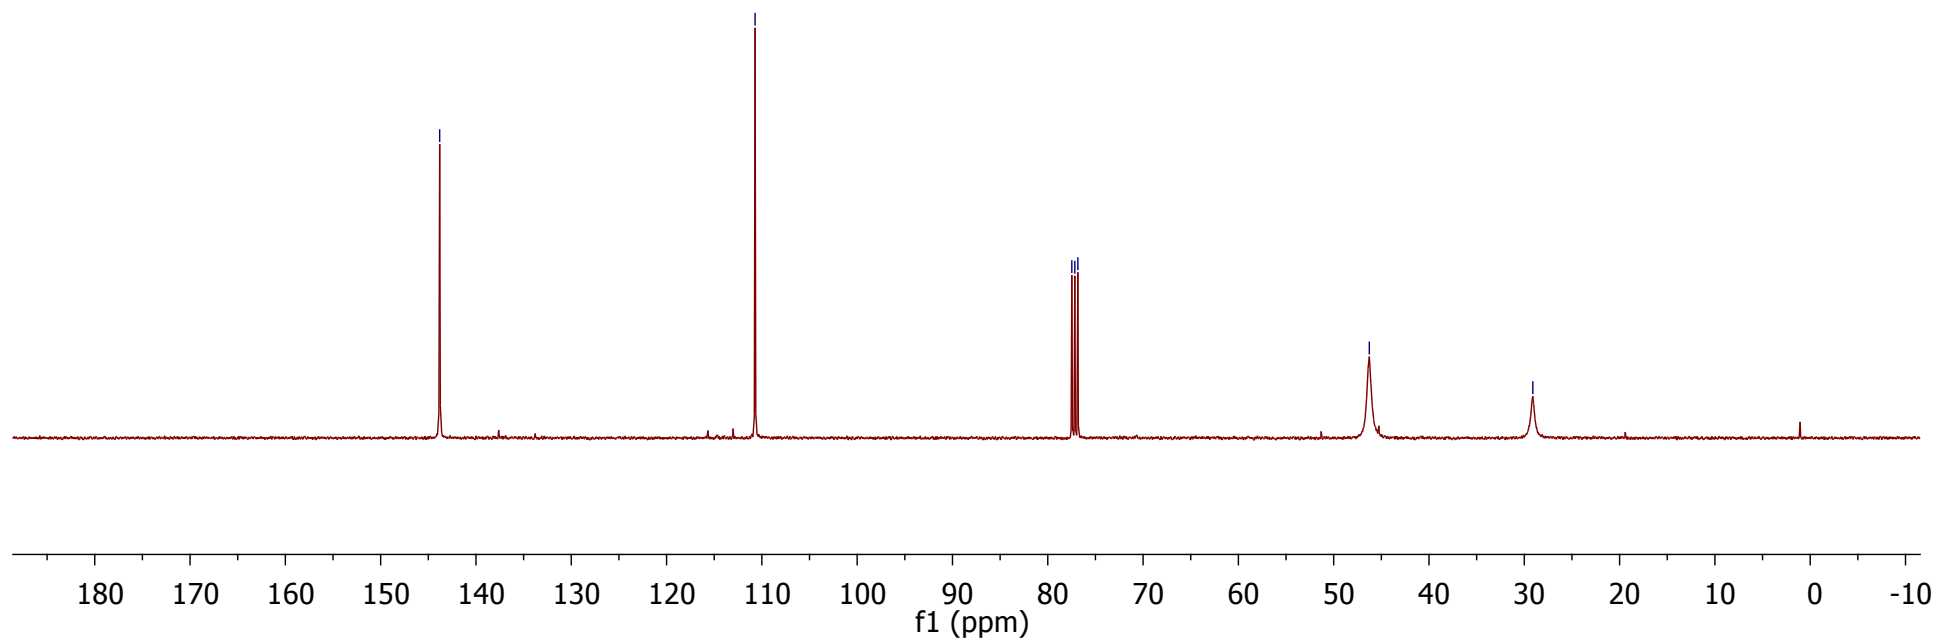

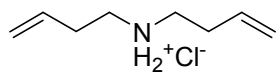

$^1\text{H}$ ,  $\text{CDCl}_3$ , 400 MHz

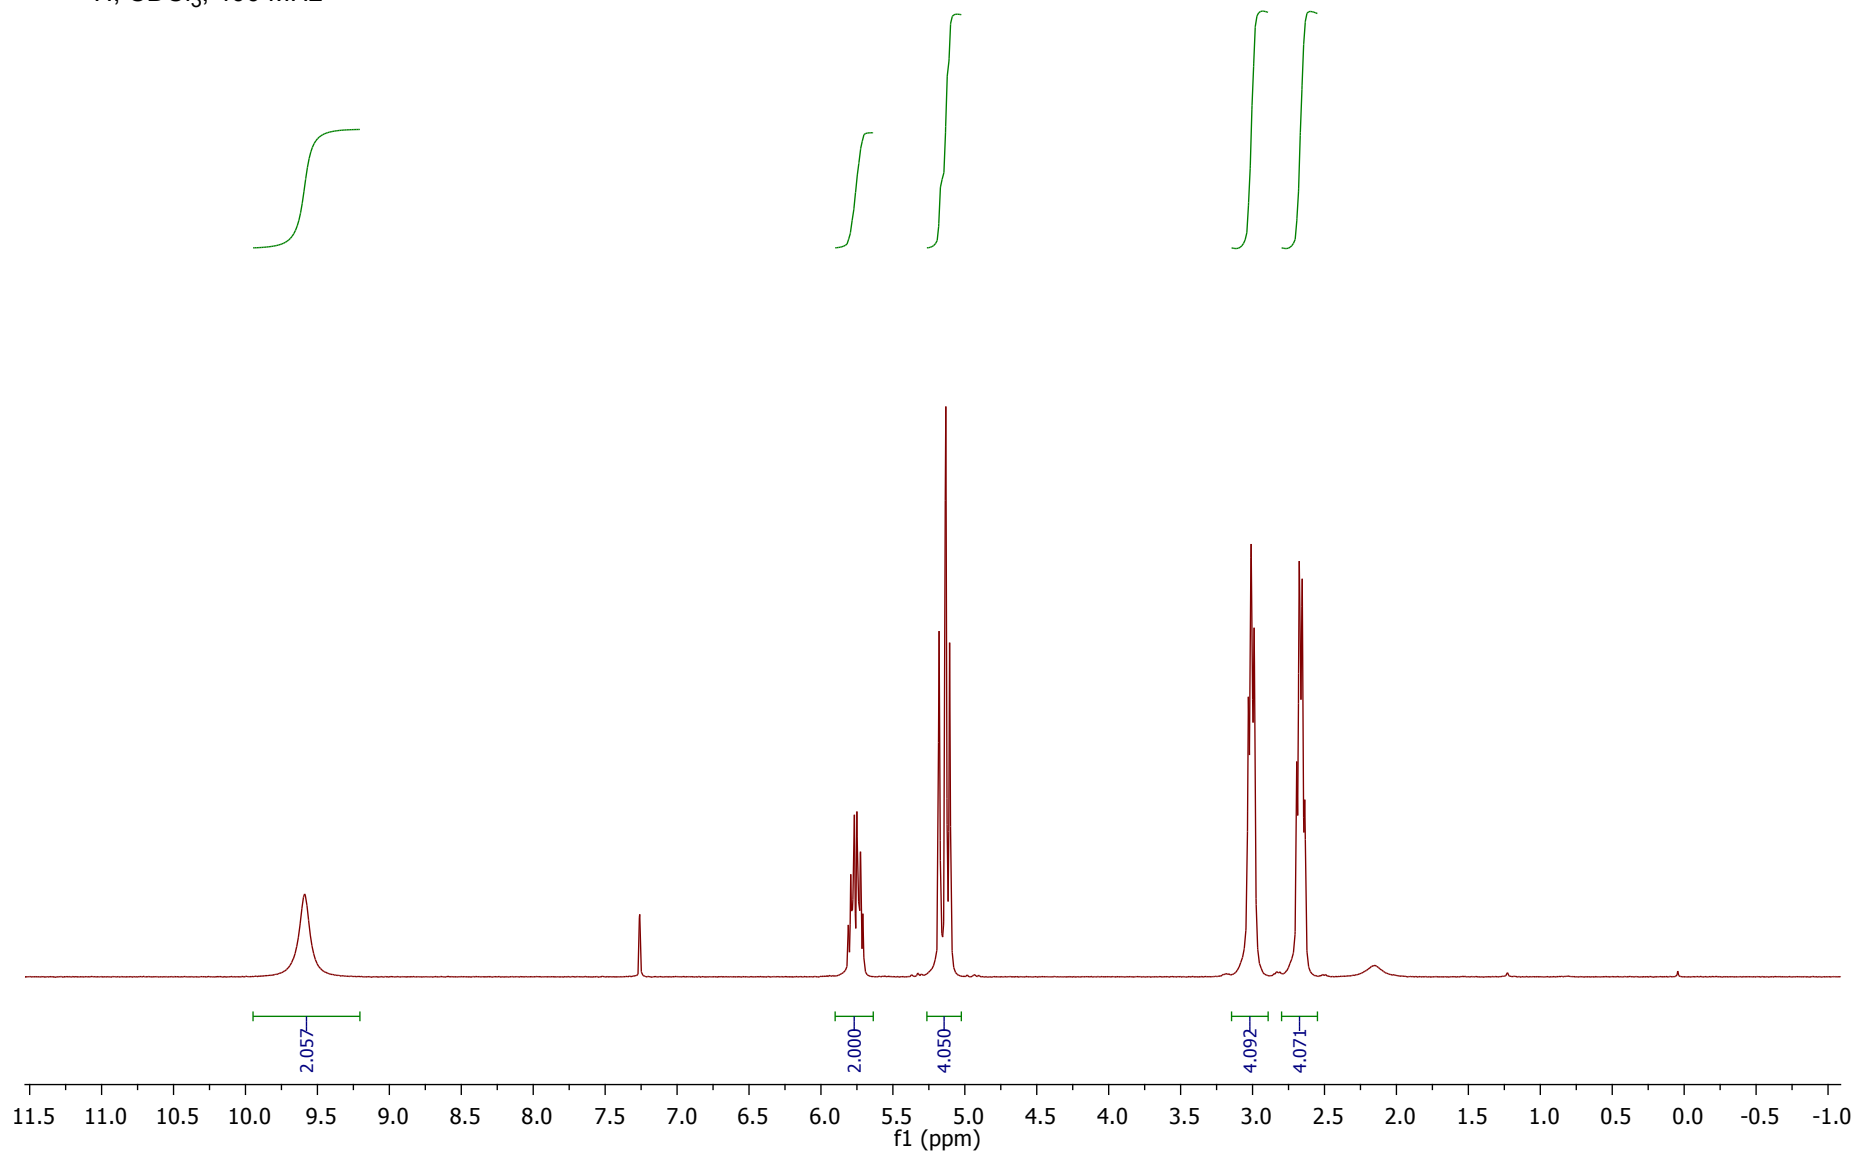

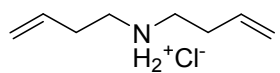

$^{13}\text{C}$ ,  $\text{CDCl}_3$ , 101 MHz

— 132.5596

— 118.6473

77.4784  
77.1603  
76.8430

— 47.0549

— 30.0912

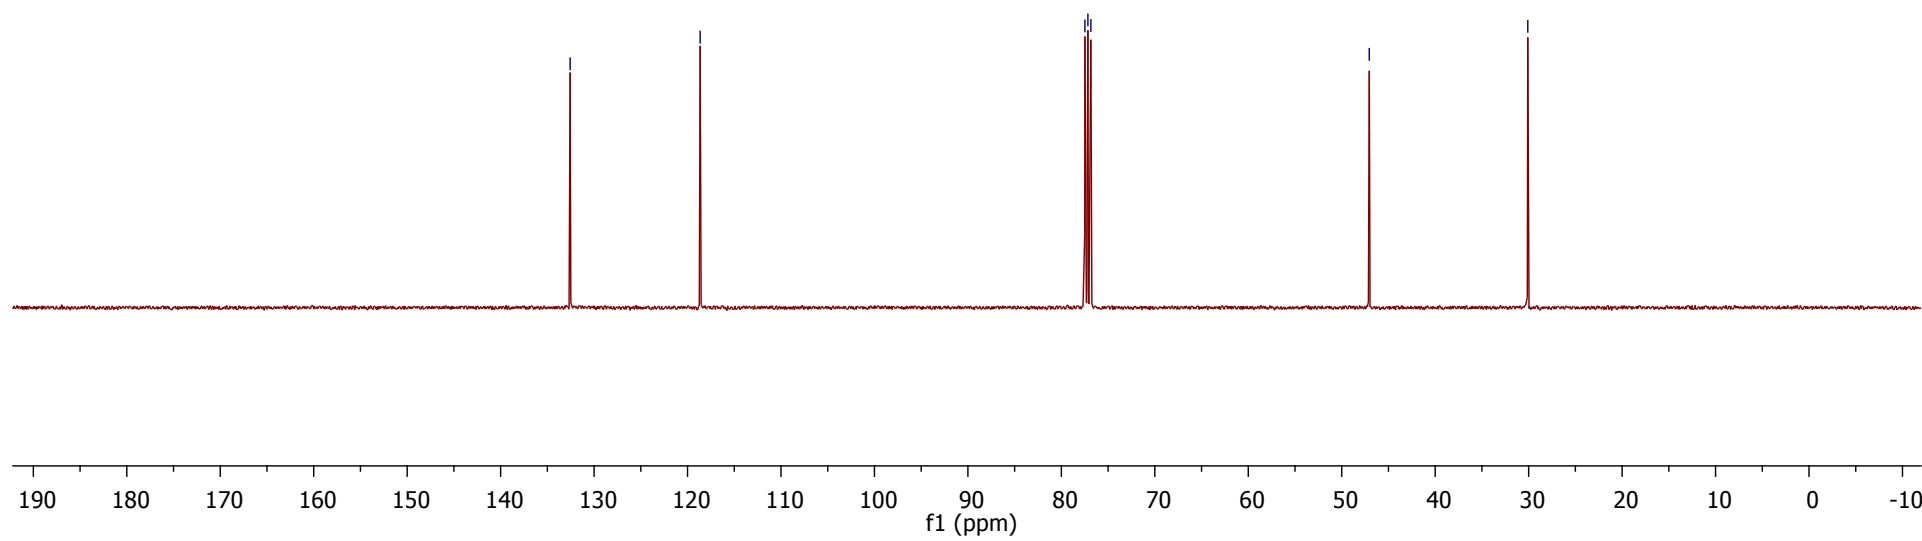

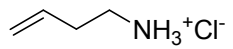

$^1\text{H}$ , DMSO- $\text{D}_6$ , 400 MHz

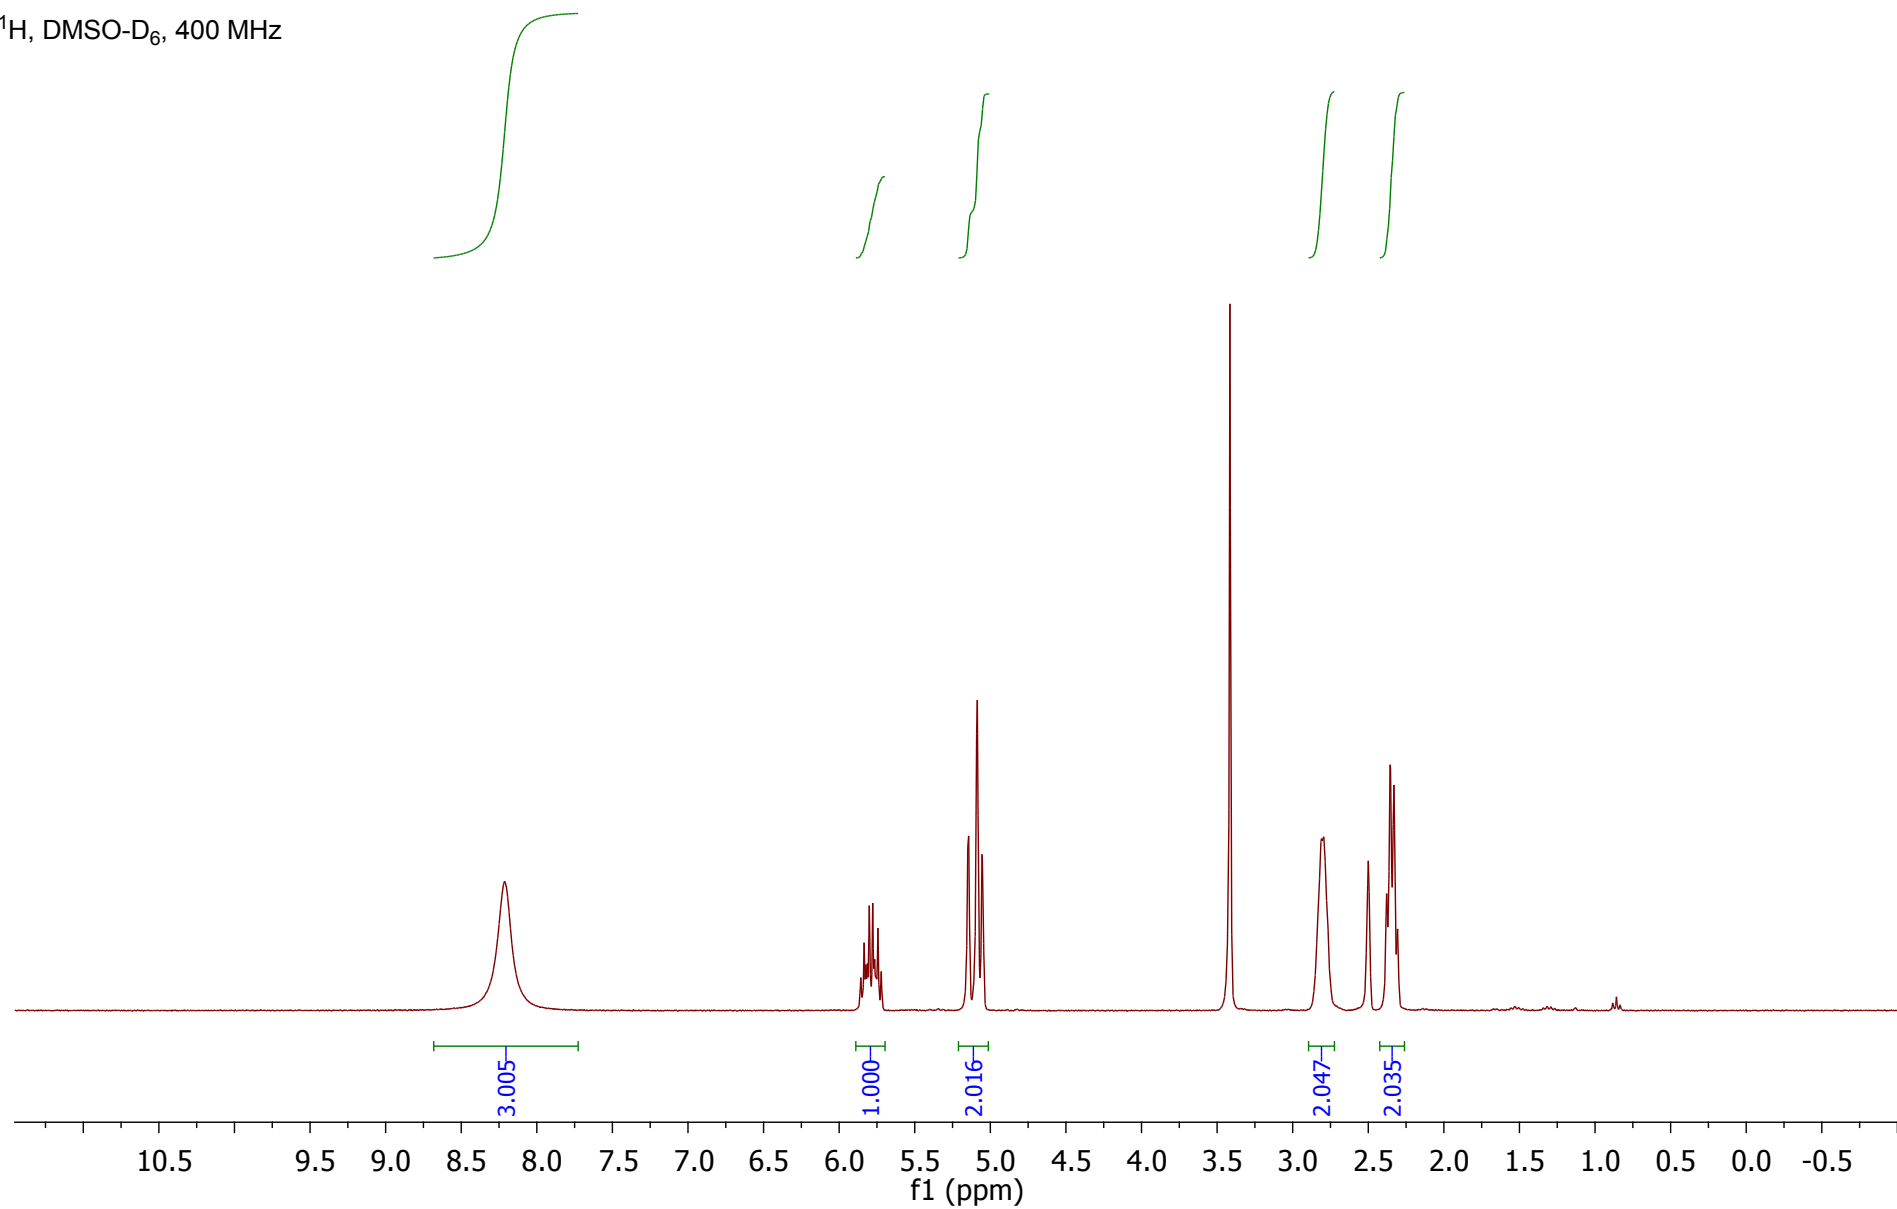

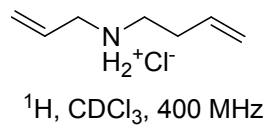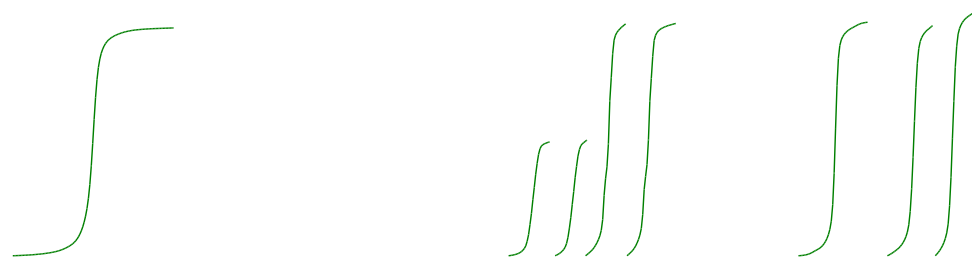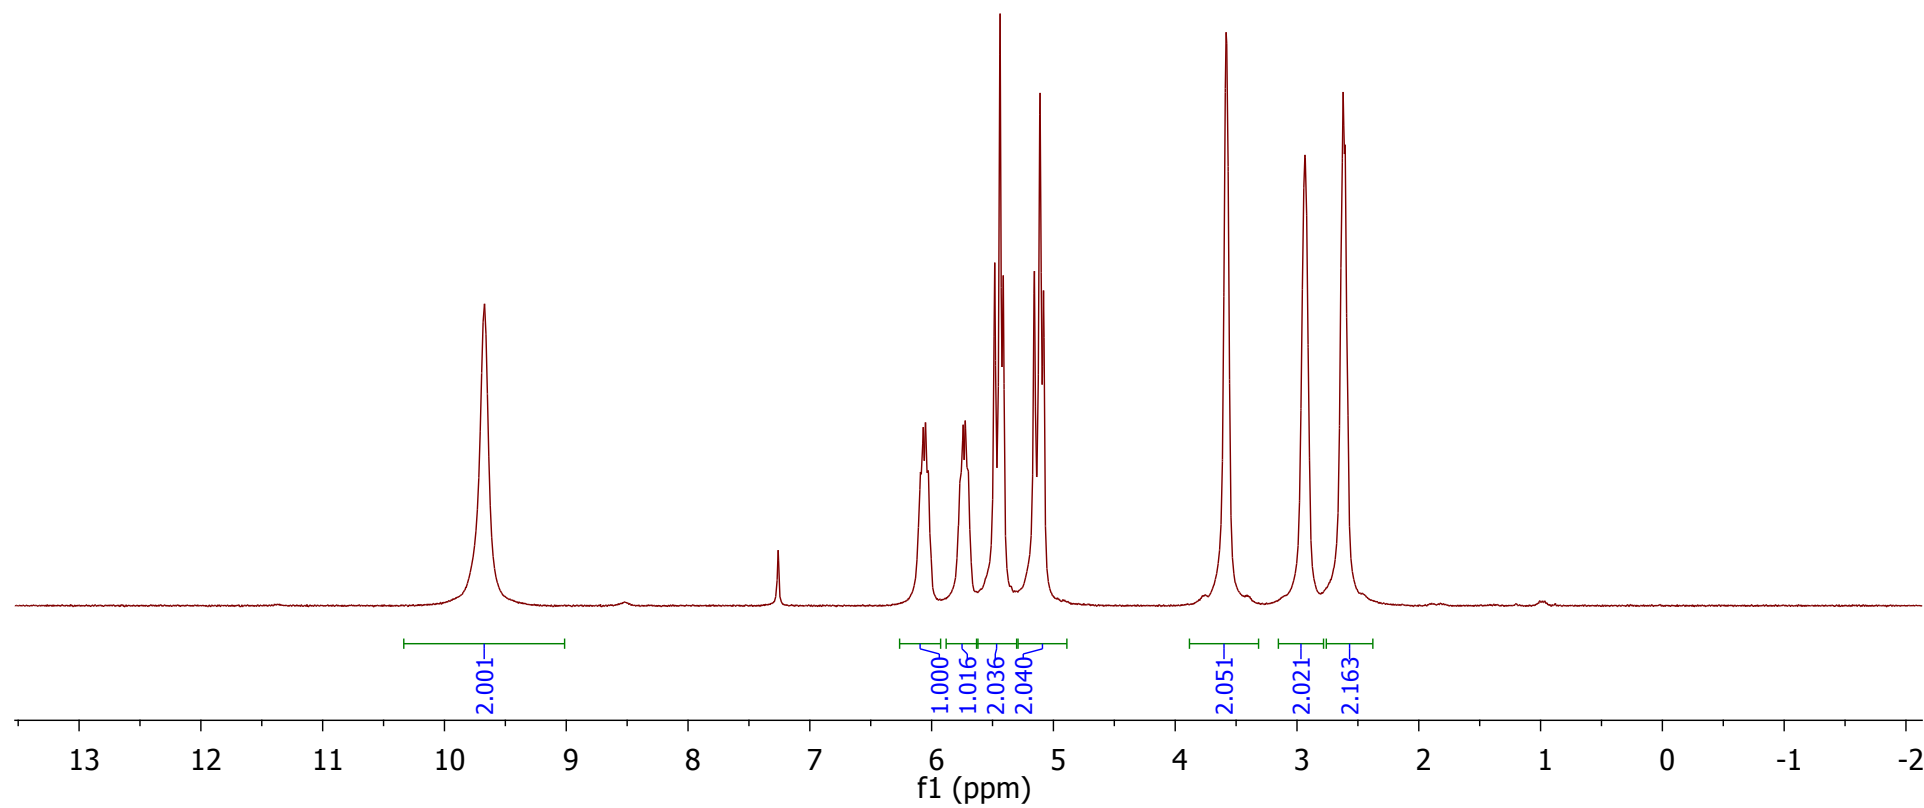



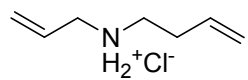

$^{13}\text{C}$ ,  $\text{CDCl}_3$ , 101 MHz

132.5390  
127.7849  
124.1465  
118.6049

77.4809  
77.1600  
76.8392

49.6565  
45.6170

30.0861

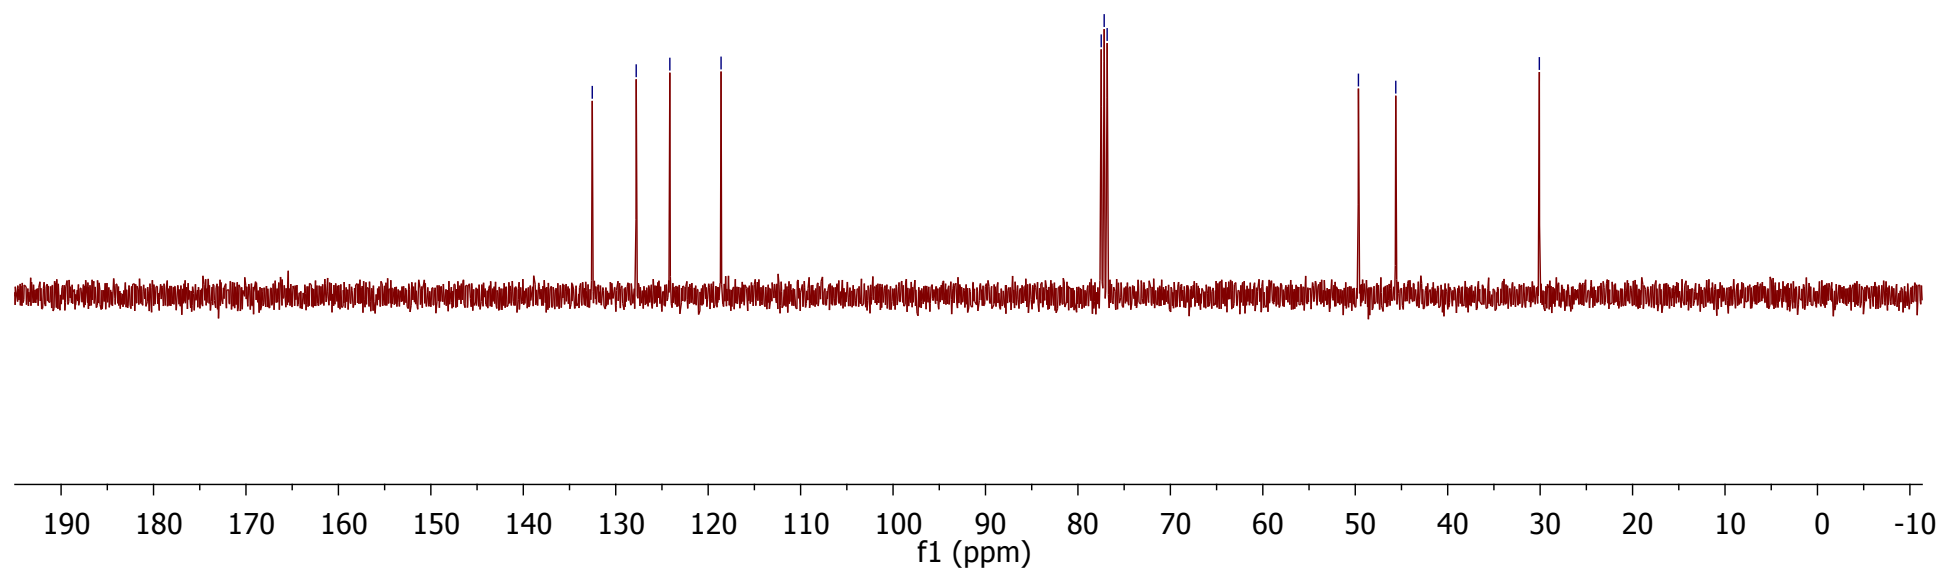

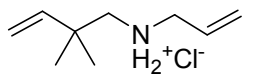

$^1\text{H}$ ,  $\text{CDCl}_3$ , 400 MHz

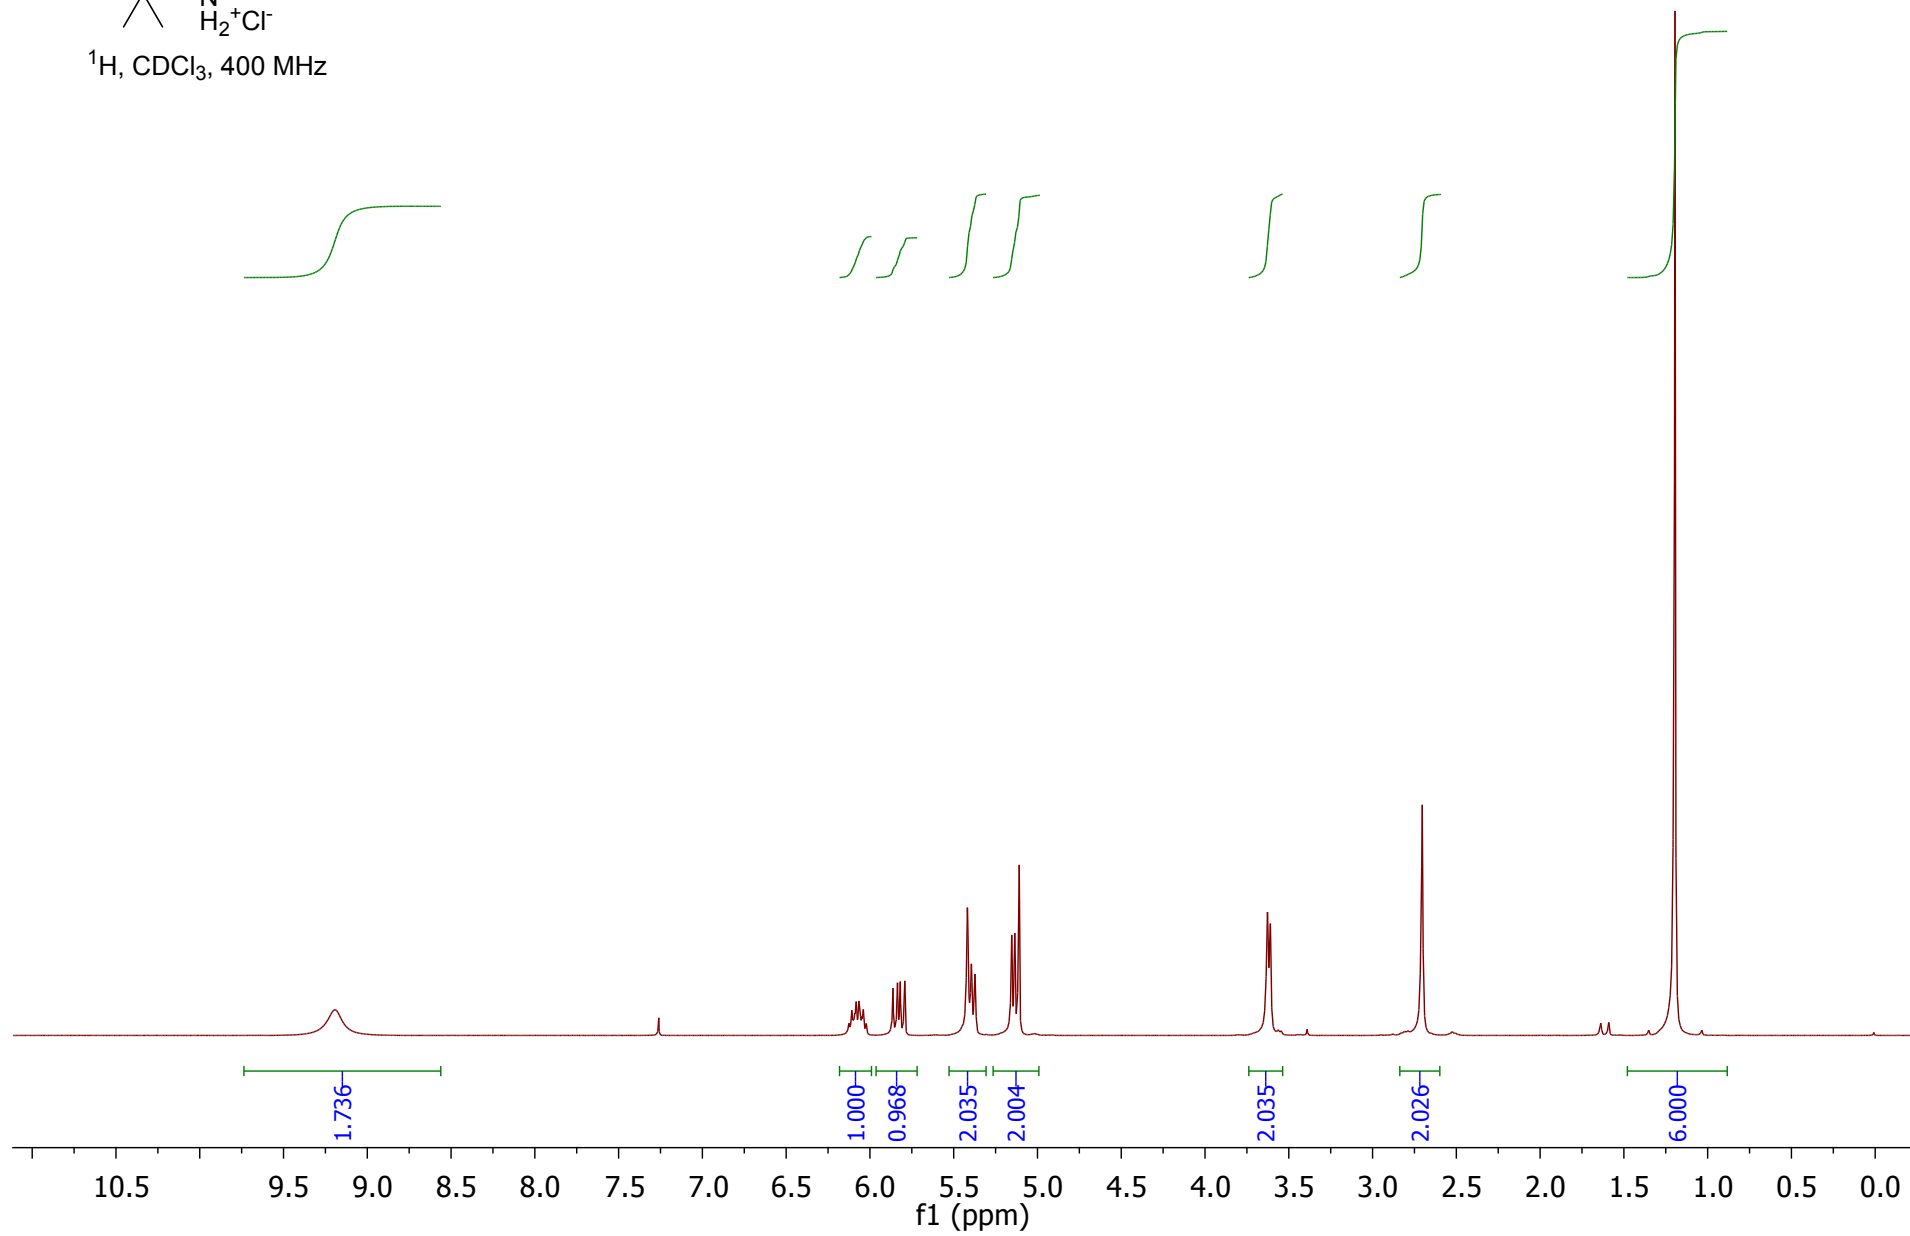

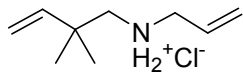

$^{13}\text{C}$ ,  $\text{CDCl}_3$ , 101 MHz

— 142.9810

— 128.3032

— 124.2856

— 115.1566

— 77.4815  
— 77.1606  
— 76.8398

— 55.8695

— 51.0498

— 36.4230

— 25.1795

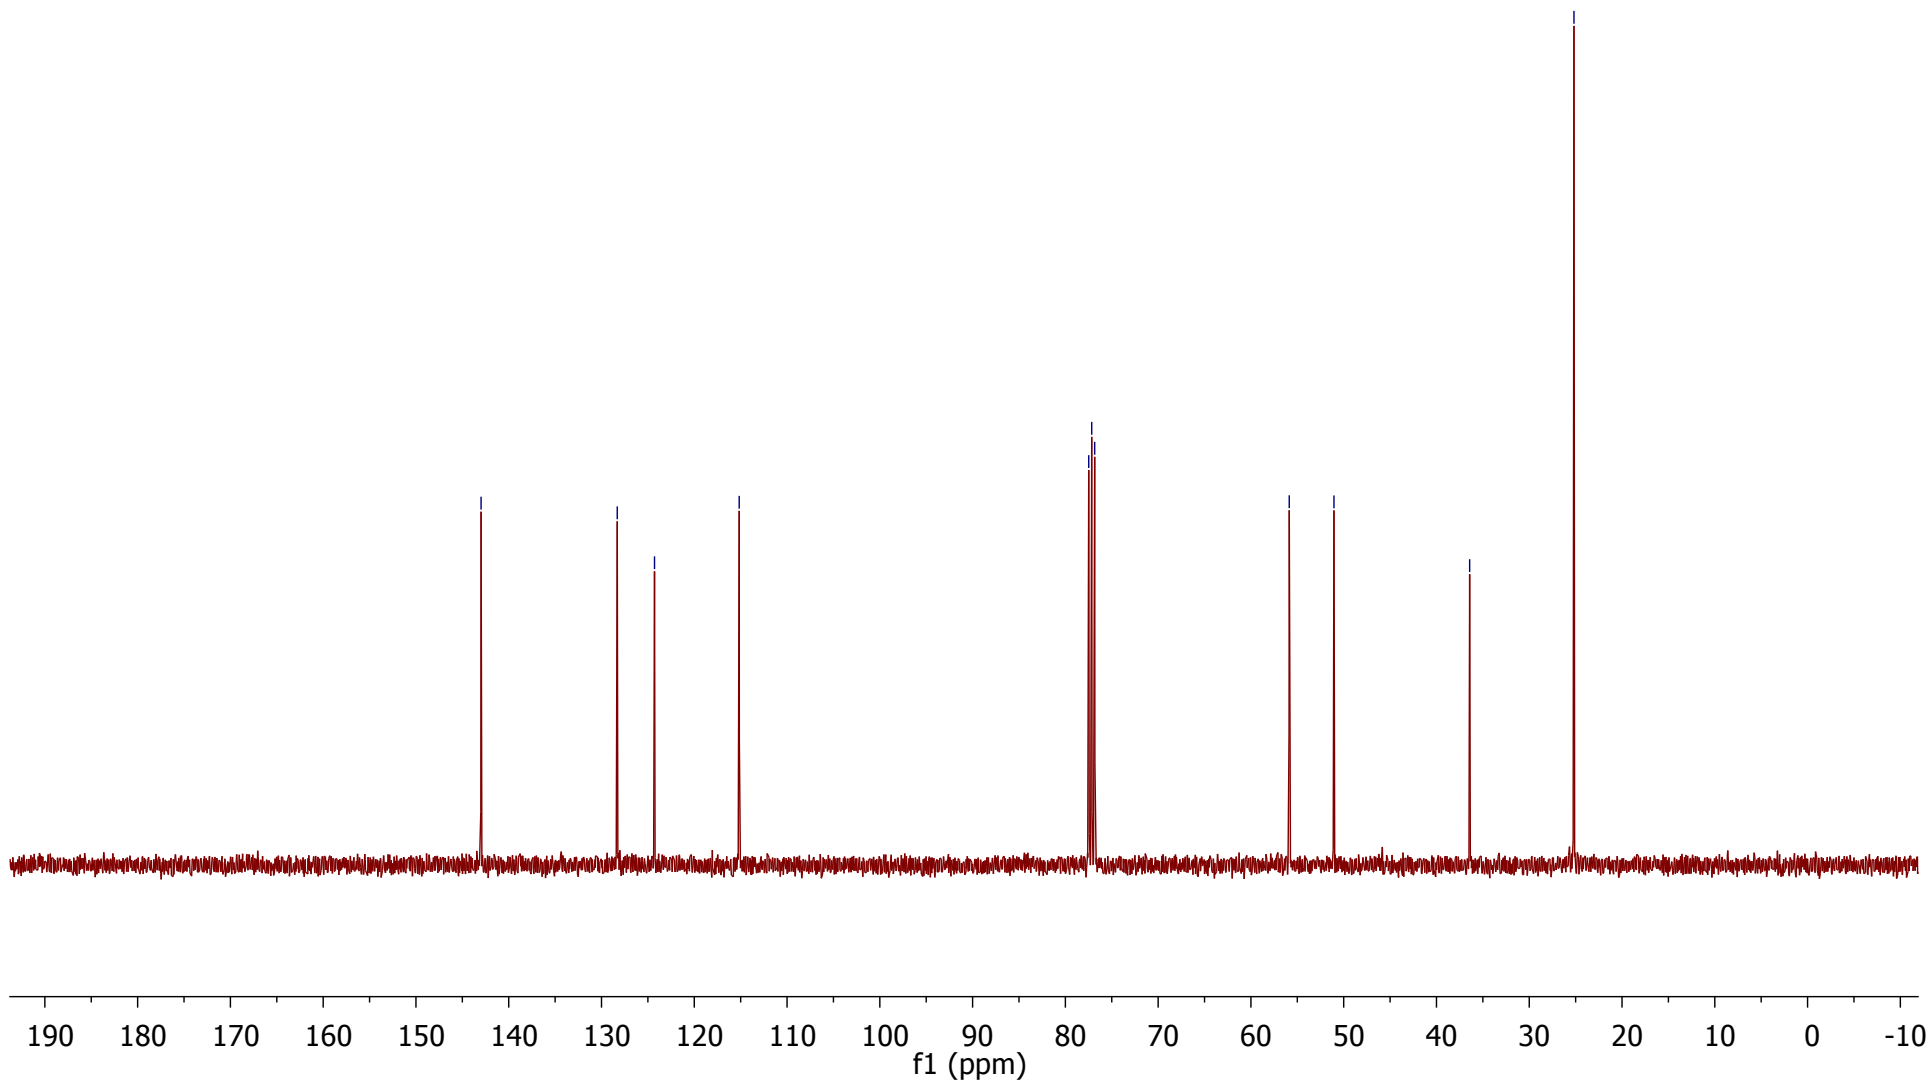

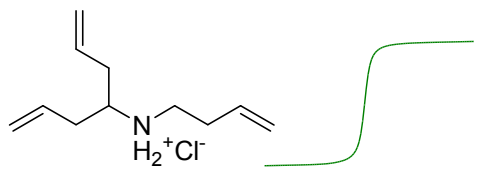

$^1\text{H}$ ,  $\text{CDCl}_3$ , 400 MHz

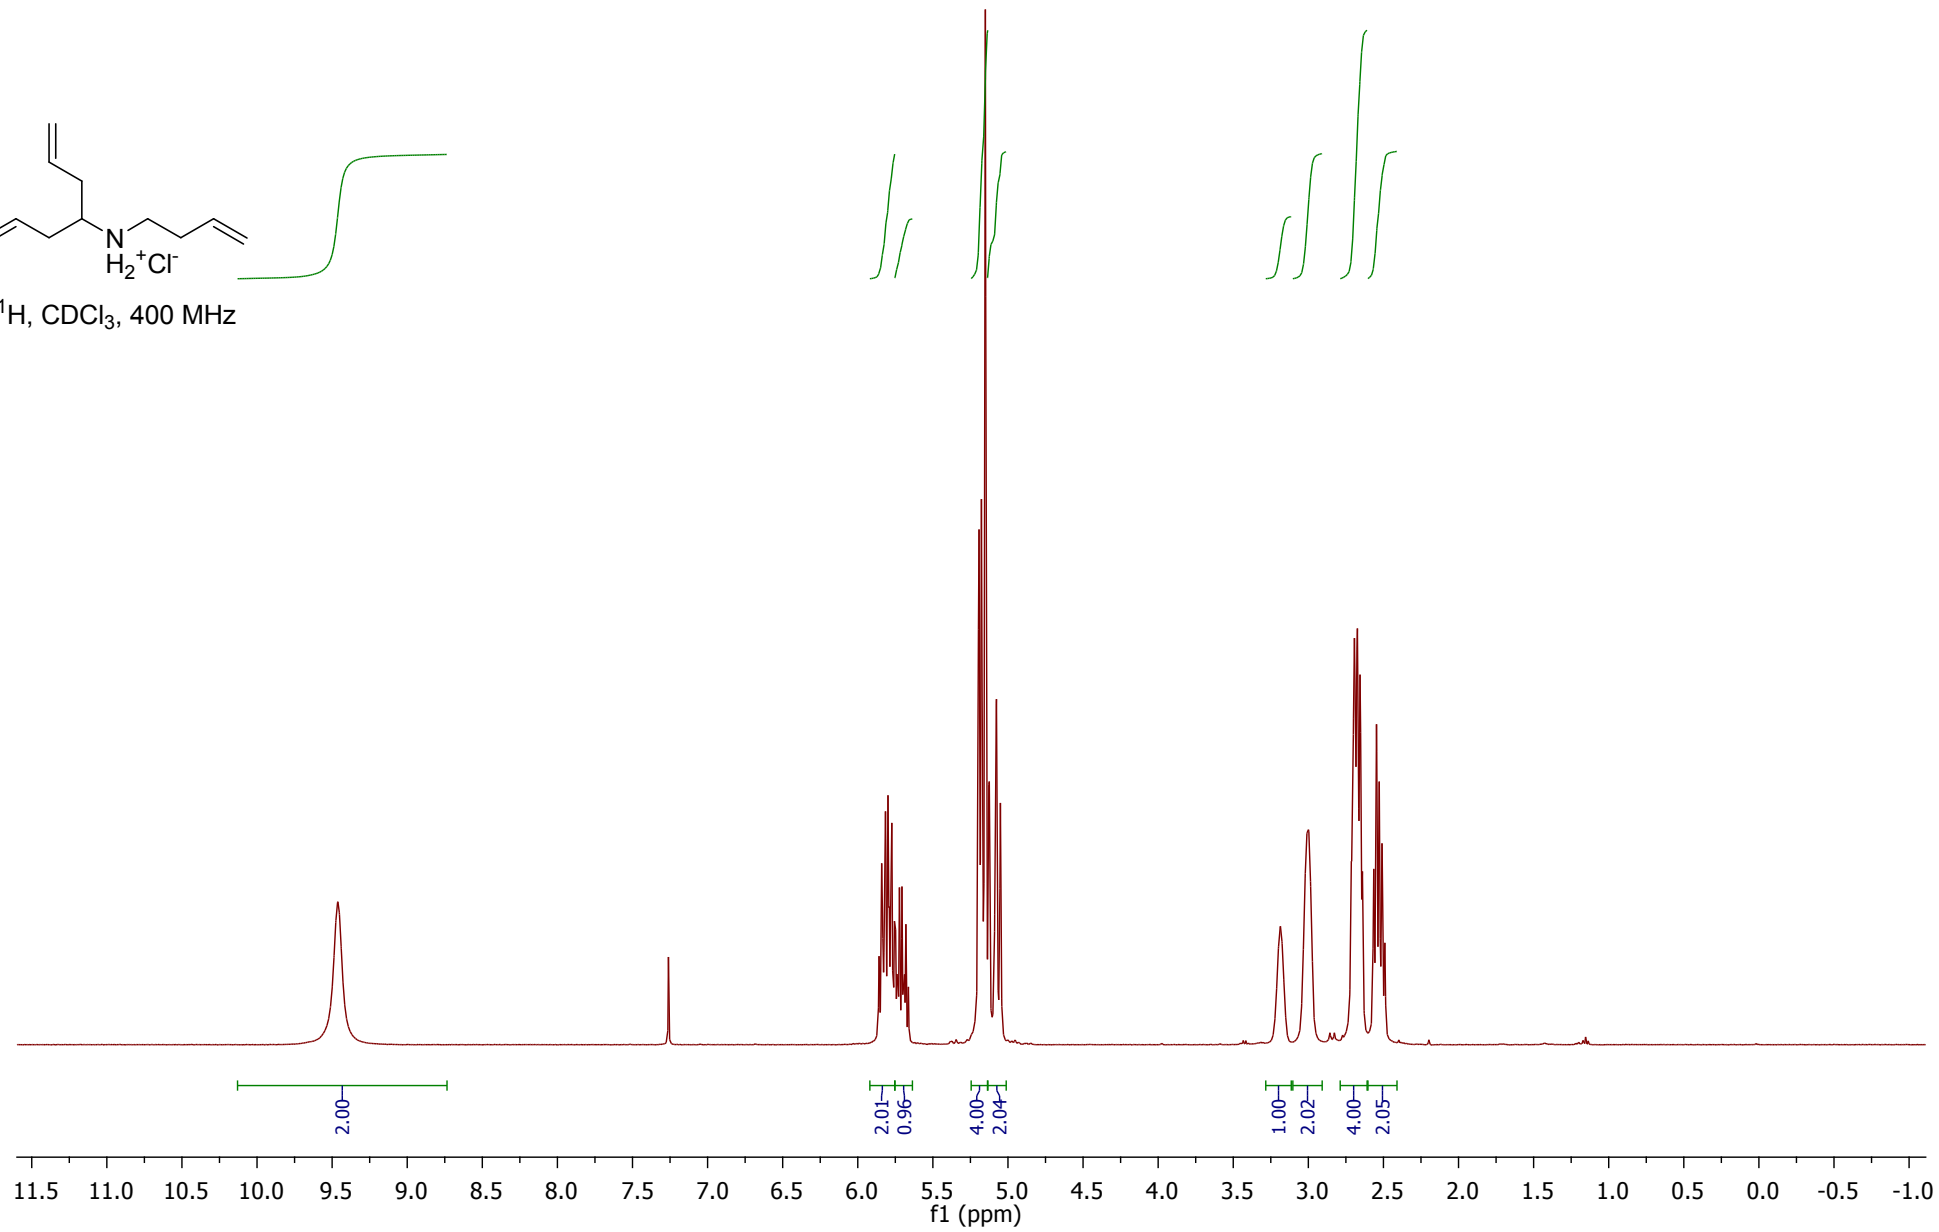

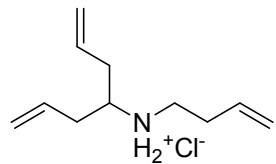

$^{13}\text{C}$ ,  $\text{CDCl}_3$ , 101 MHz

132.79  
132.03

120.04  
118.31

77.48  
77.16  
76.84

57.14

44.53

34.53

30.10

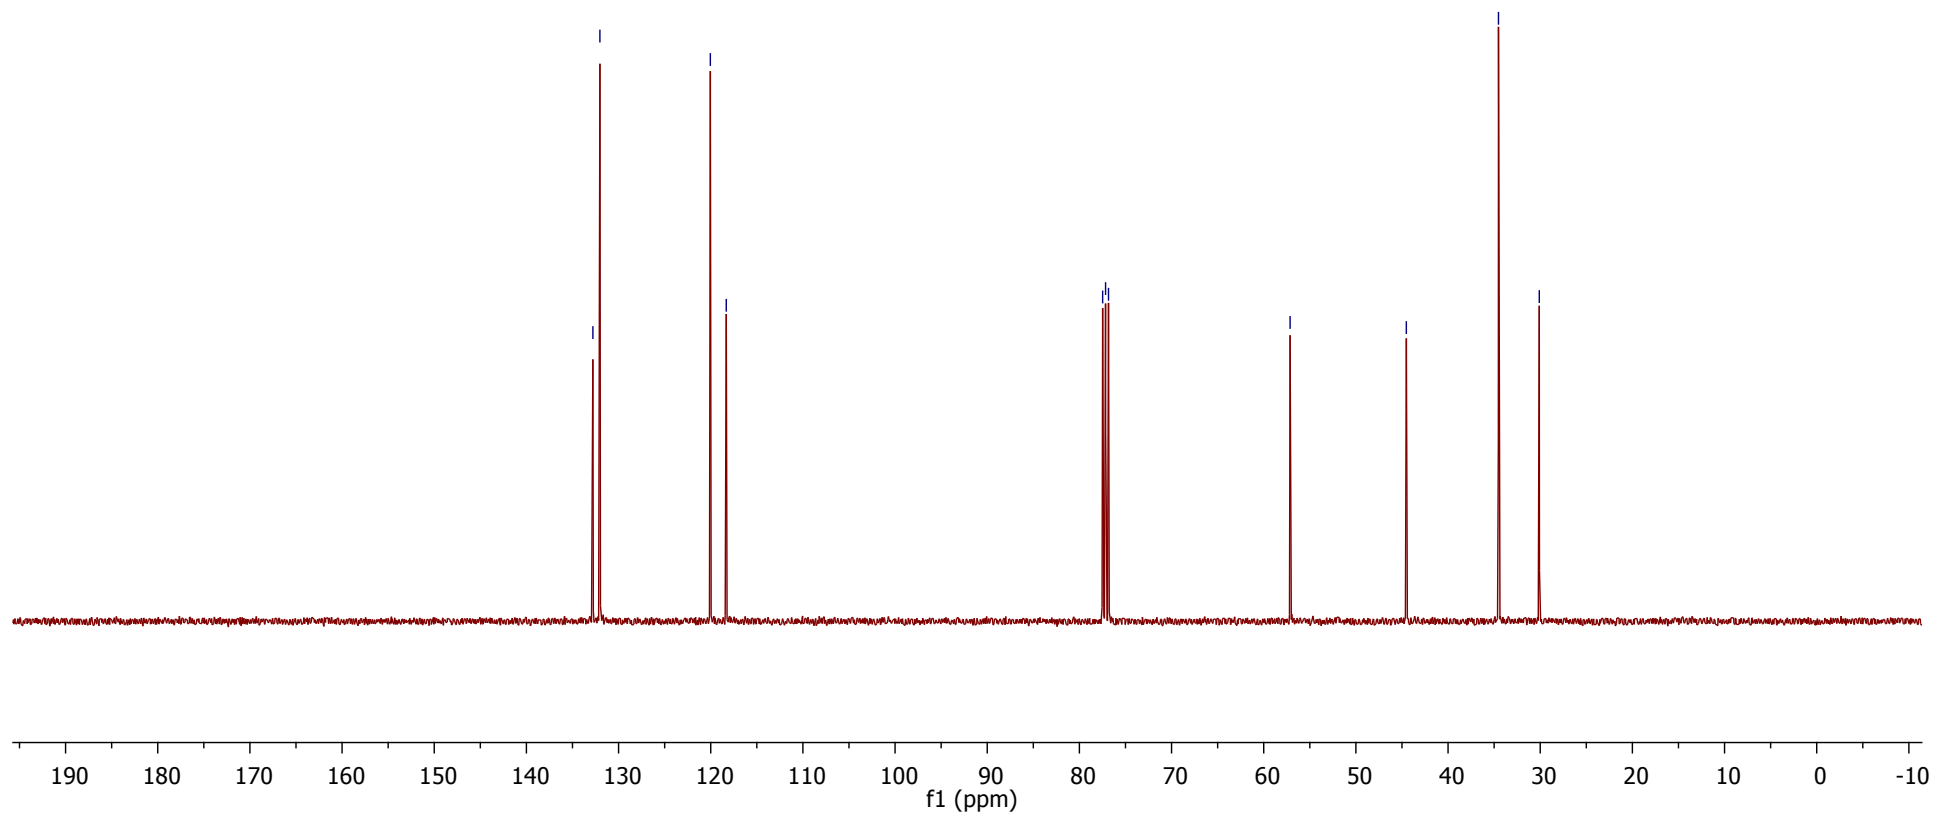

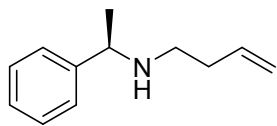

$^1\text{H}$ ,  $\text{CDCl}_3$ , 400 MHz

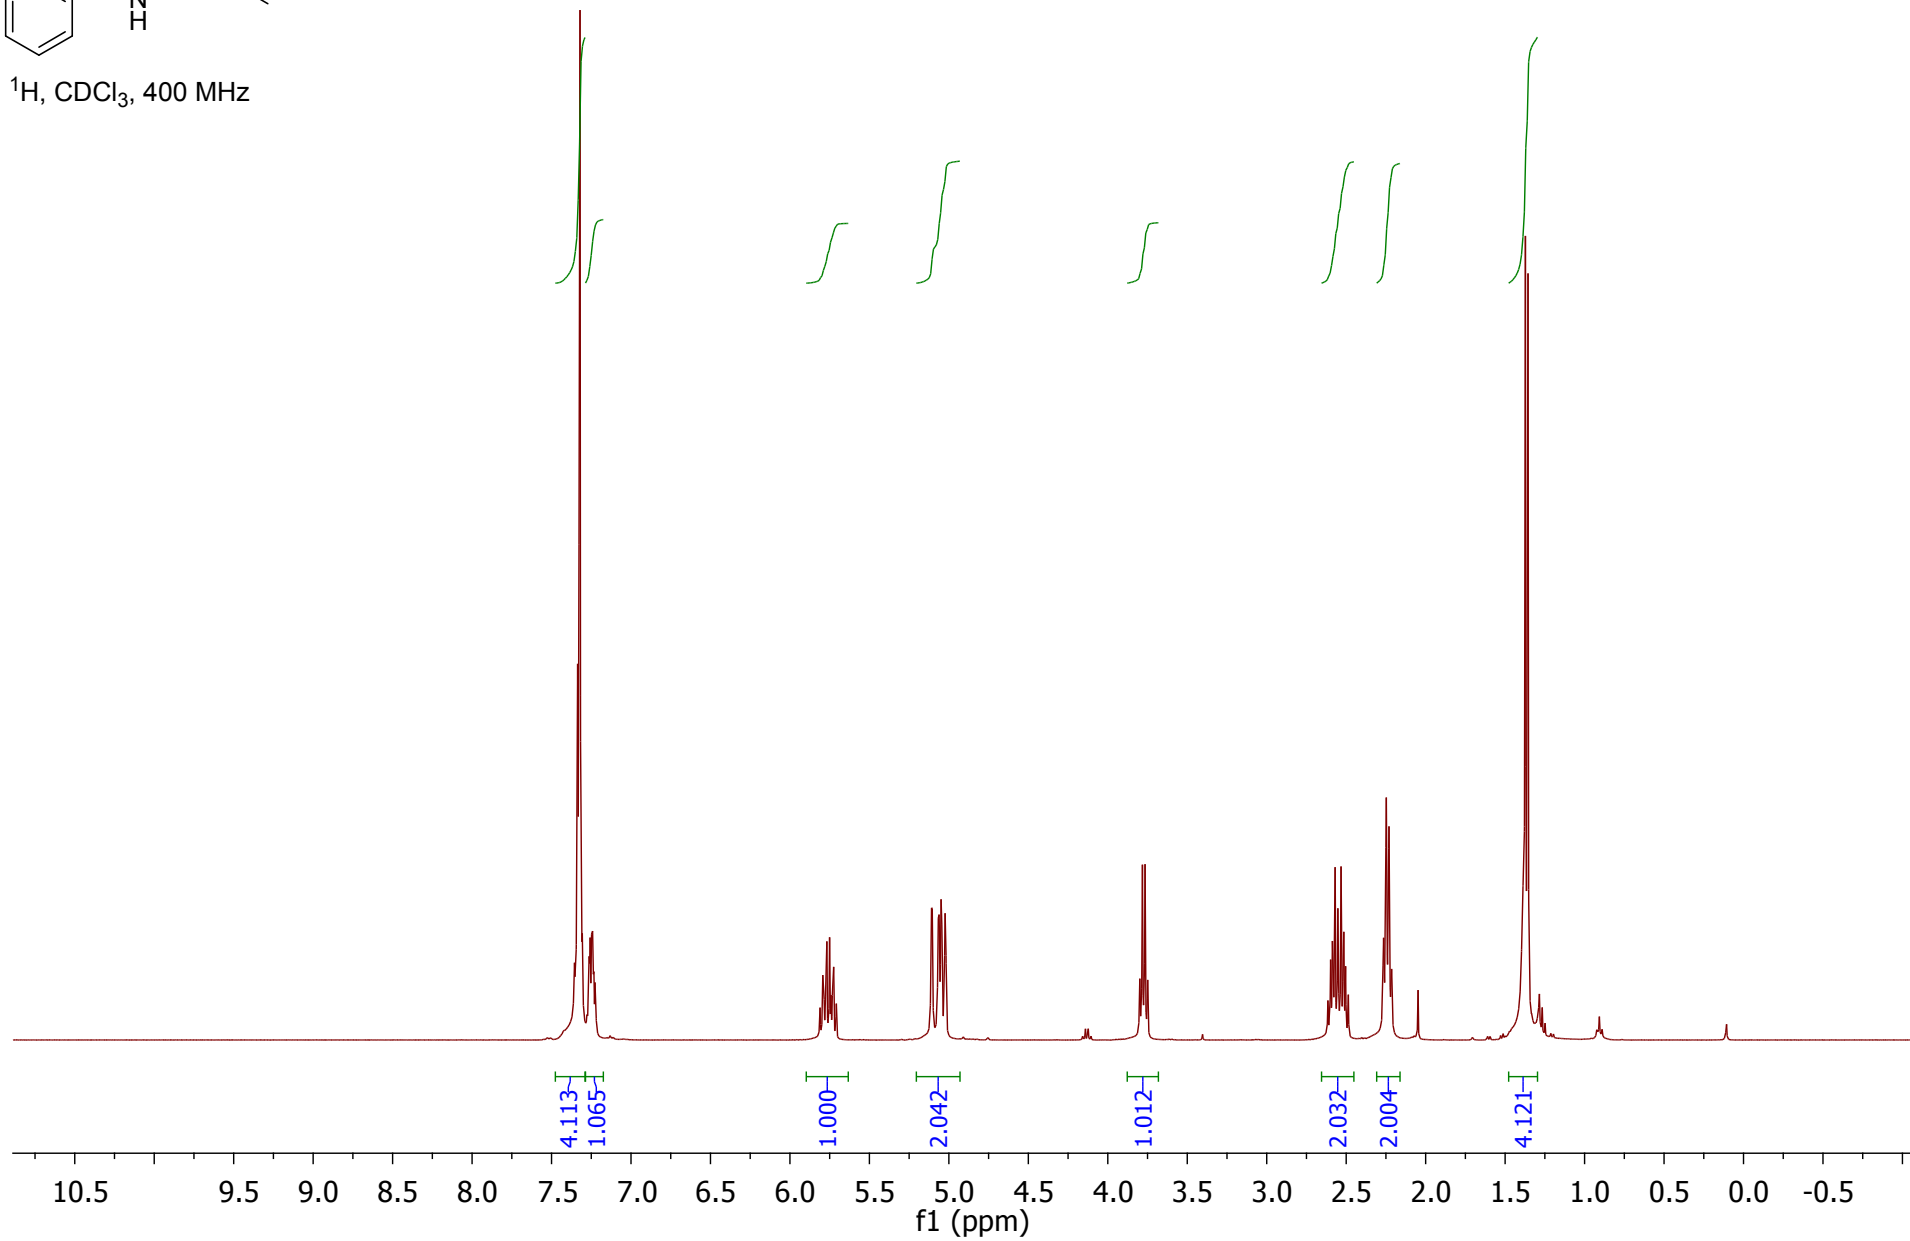

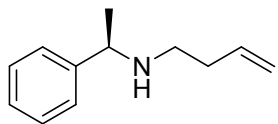

$^{13}\text{C}$ ,  $\text{CDCl}_3$ , 101 MHz

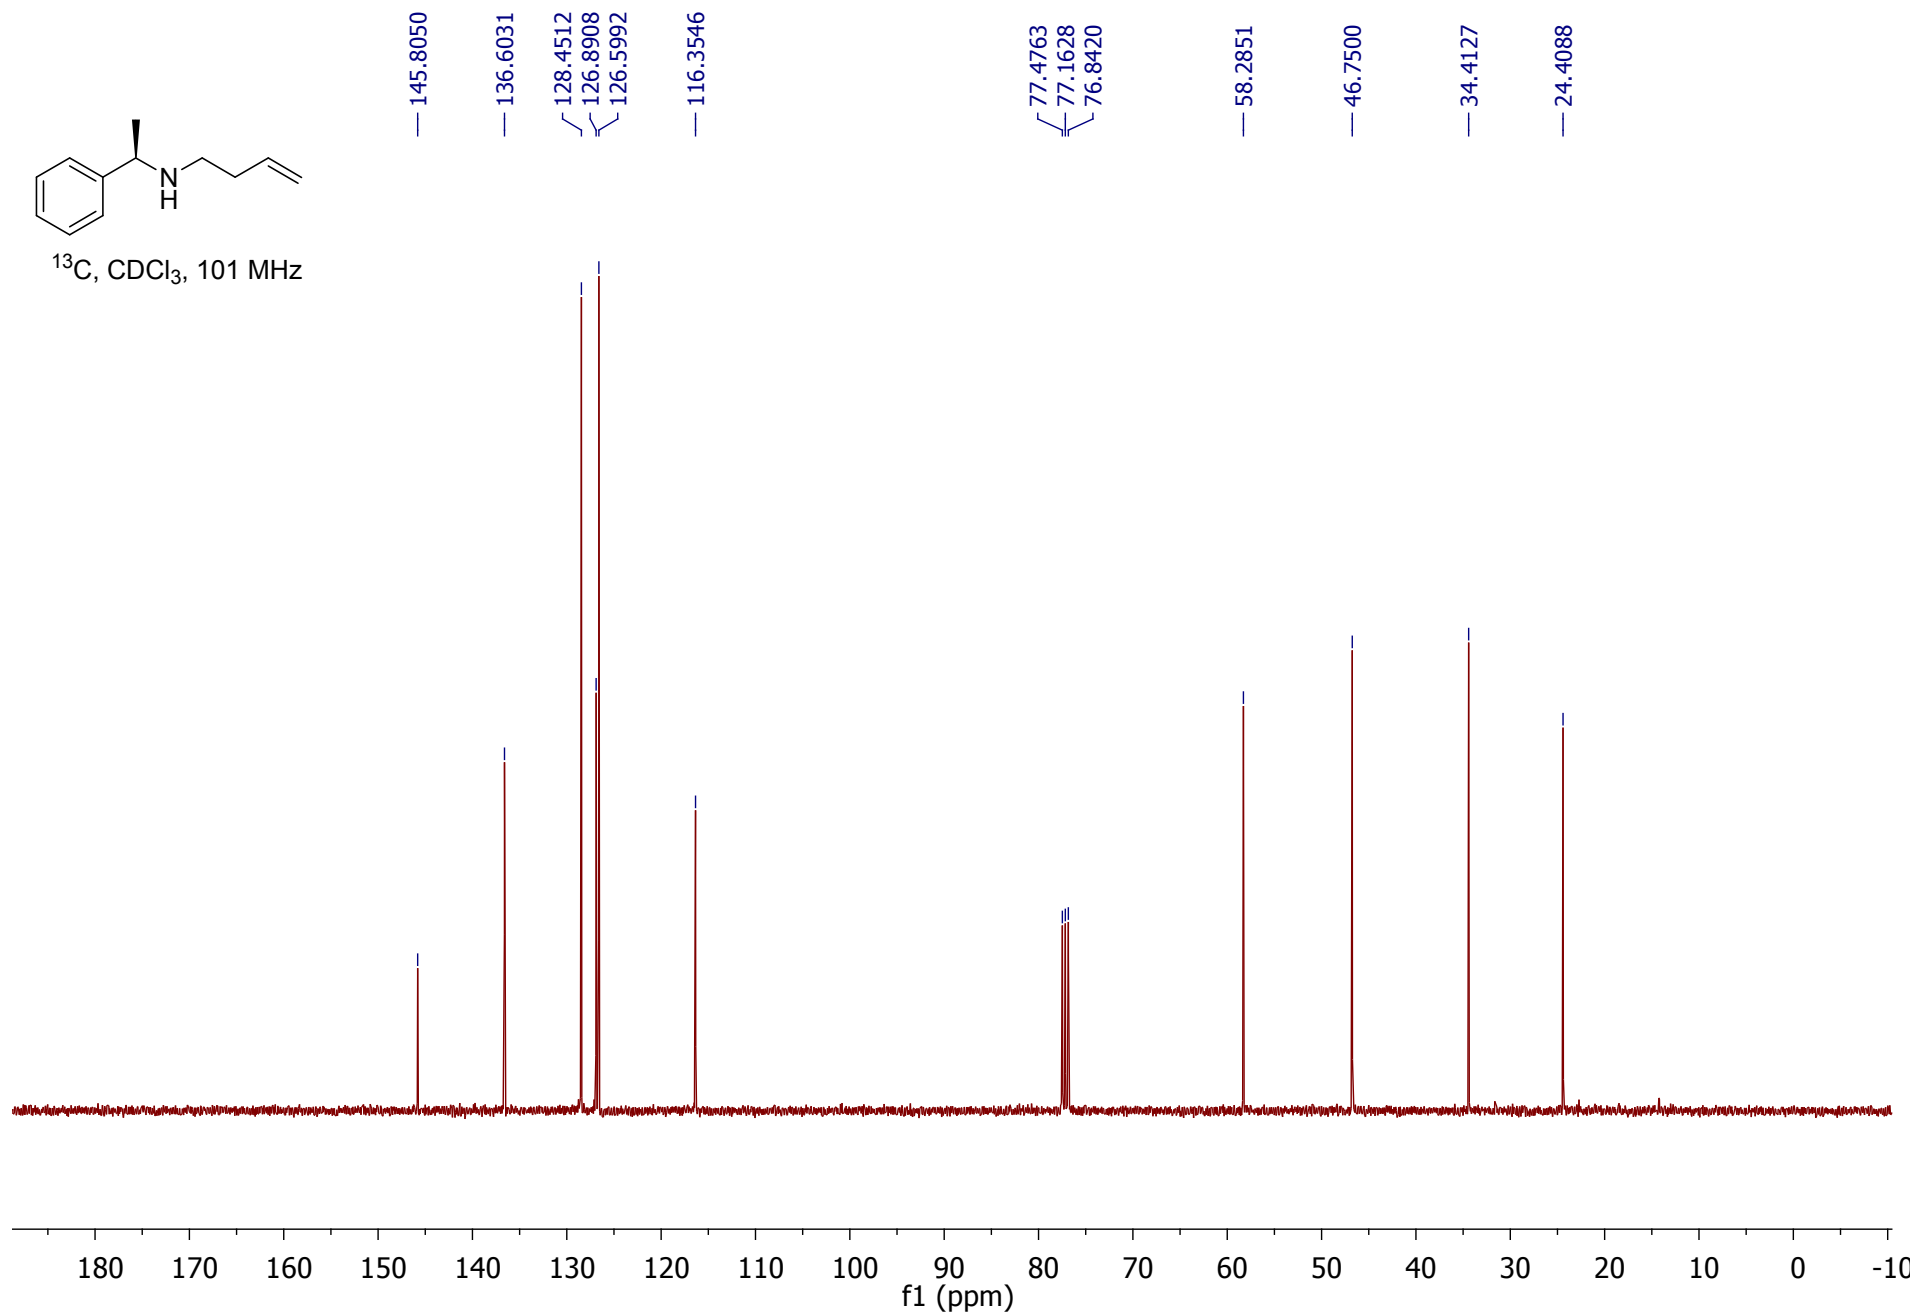

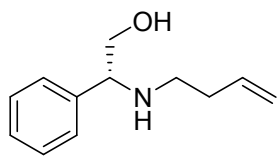

$^1\text{H}$ ,  $\text{CDCl}_3$ , 400 MHz

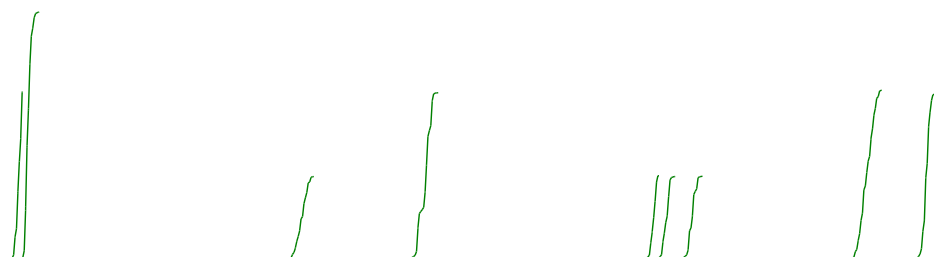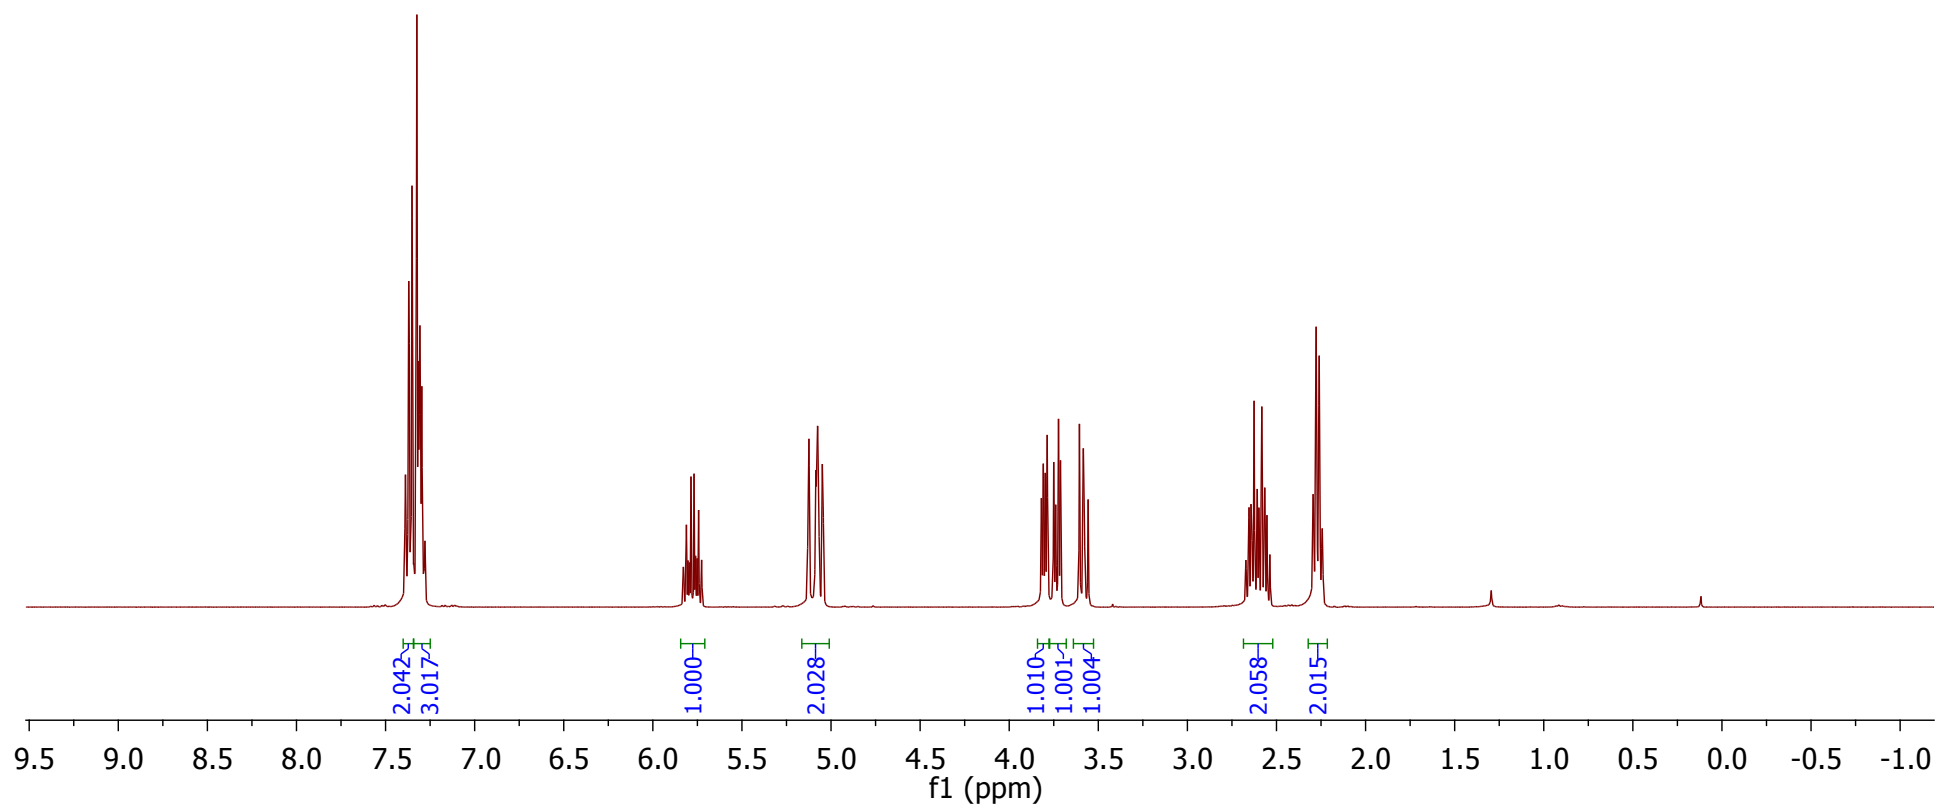



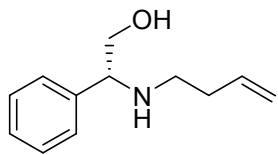

$^{13}\text{C}$ ,  $\text{CDCl}_3$ , 101 MHz

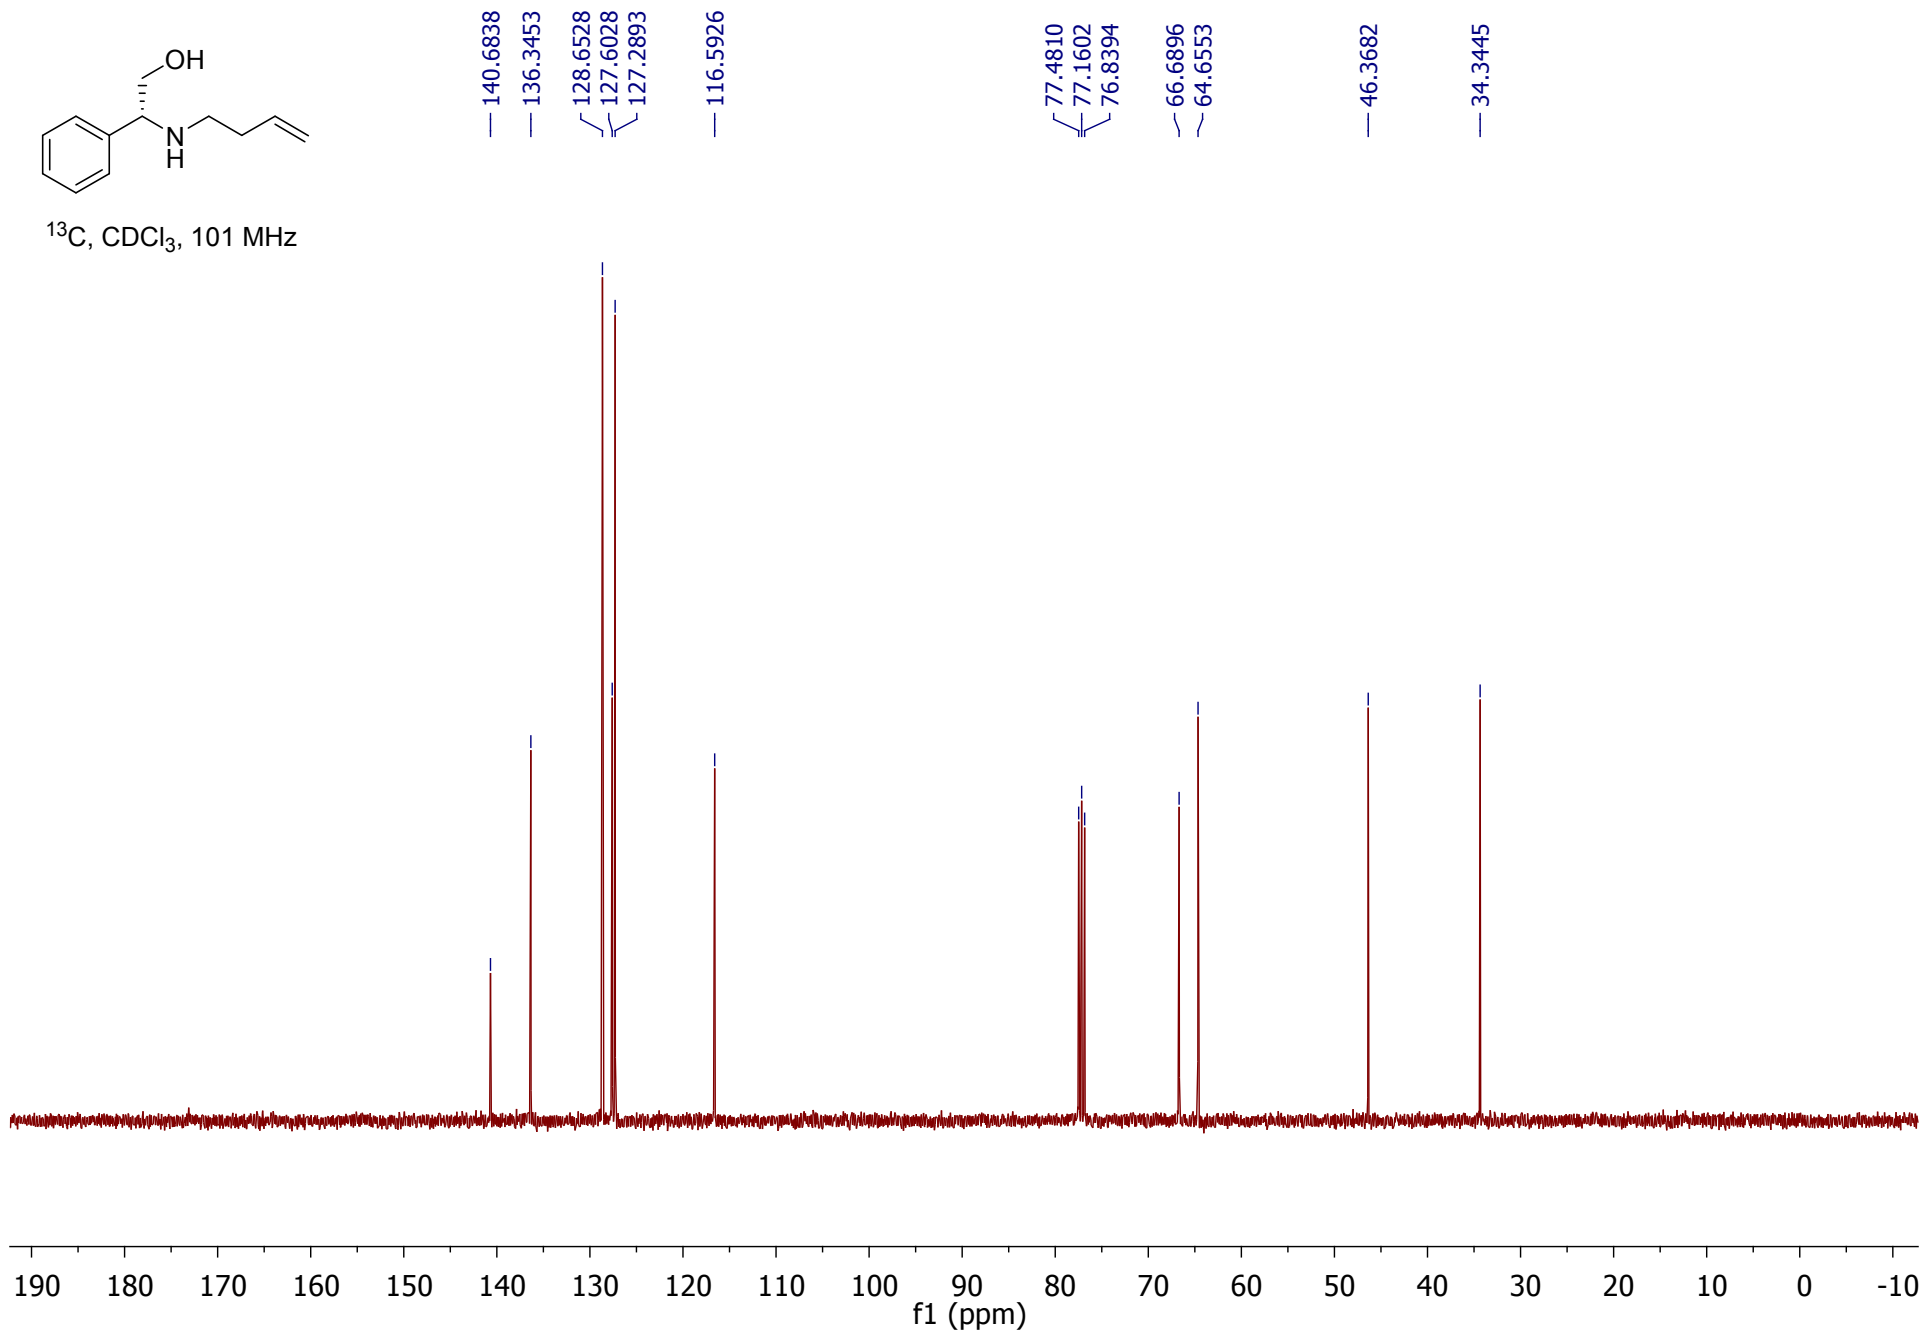

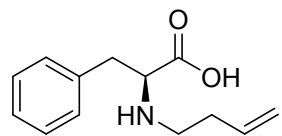

$^1\text{H}$ ,  $\text{D}_2\text{O}/\text{DCI}$ , 400 MHz

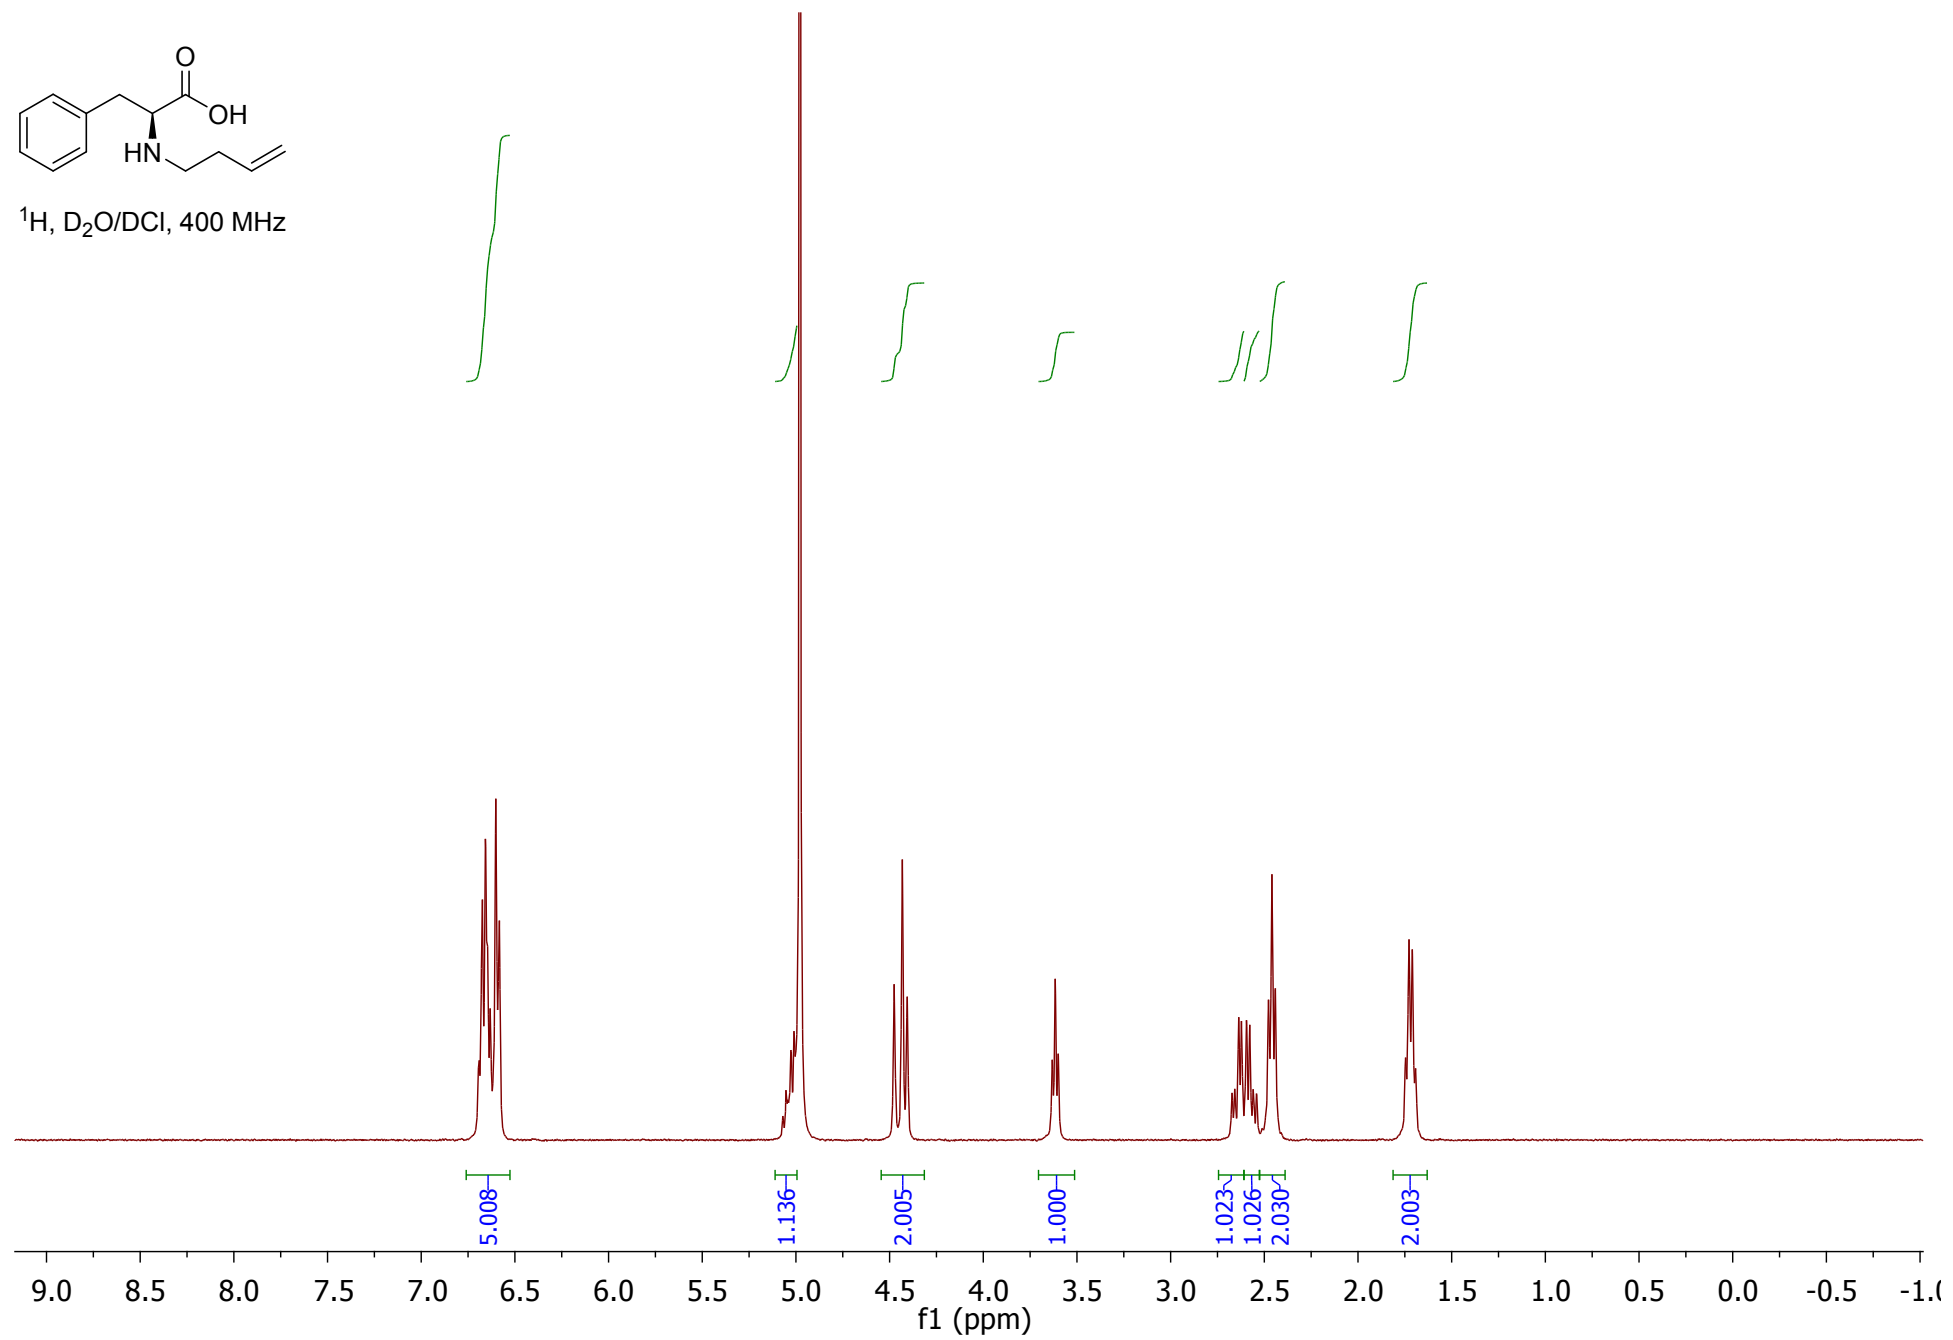

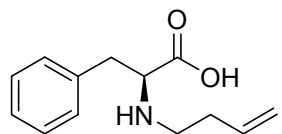

$^{13}\text{C}$ ,  $\text{D}_2\text{O}/\text{DCI}$ , 101 MHz

— 169.6885

132.9831  
131.9988  
128.8634  
128.6447  
127.5218  
— 118.4001

— 60.2358

— 45.3684

— 34.2124

— 29.1594

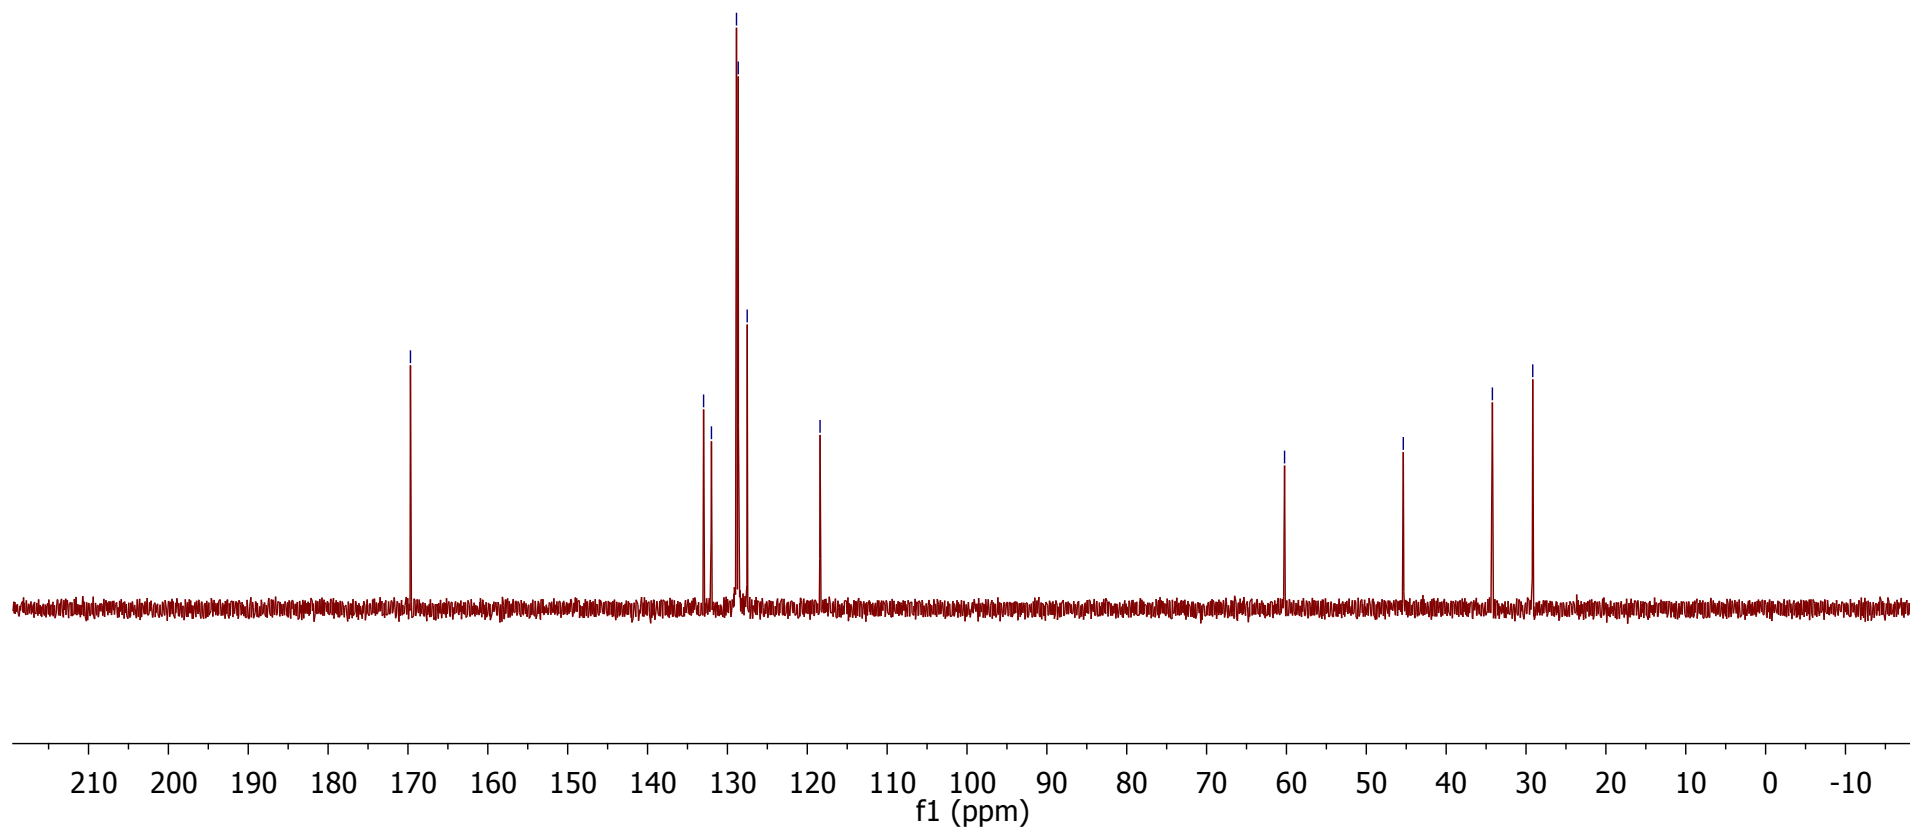

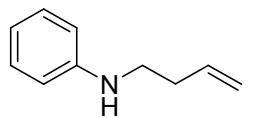

$^1\text{H}$ ,  $\text{CDCl}_3$ , 400 MHz

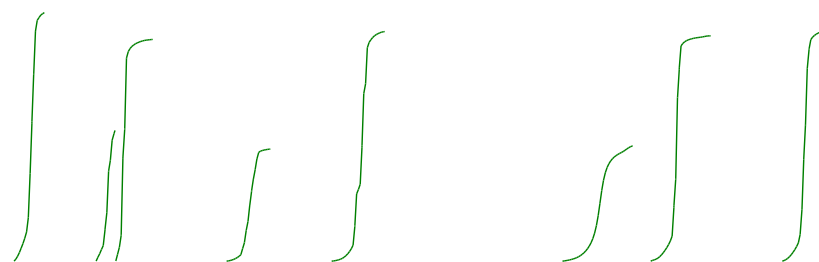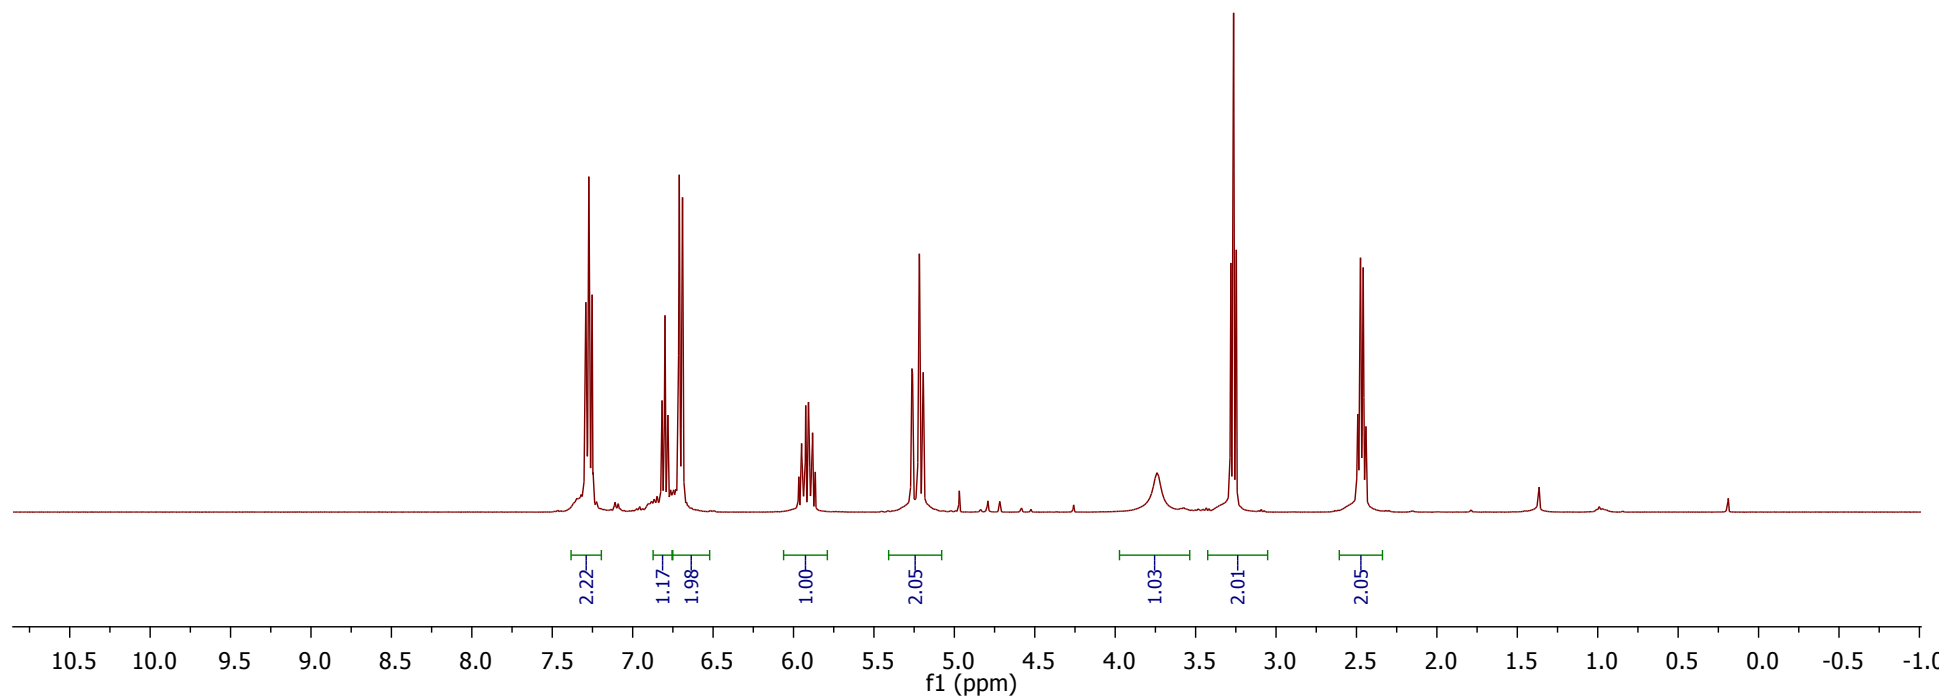

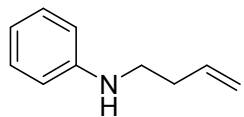

$^{13}\text{C}$ ,  $\text{CDCl}_3$ , 101 MHz

- 148.33
- 135.88
- 129.32
- 117.42
- 117.15
- 112.96
- 77.48
- 77.16
- 76.84
- 42.86
- 33.70

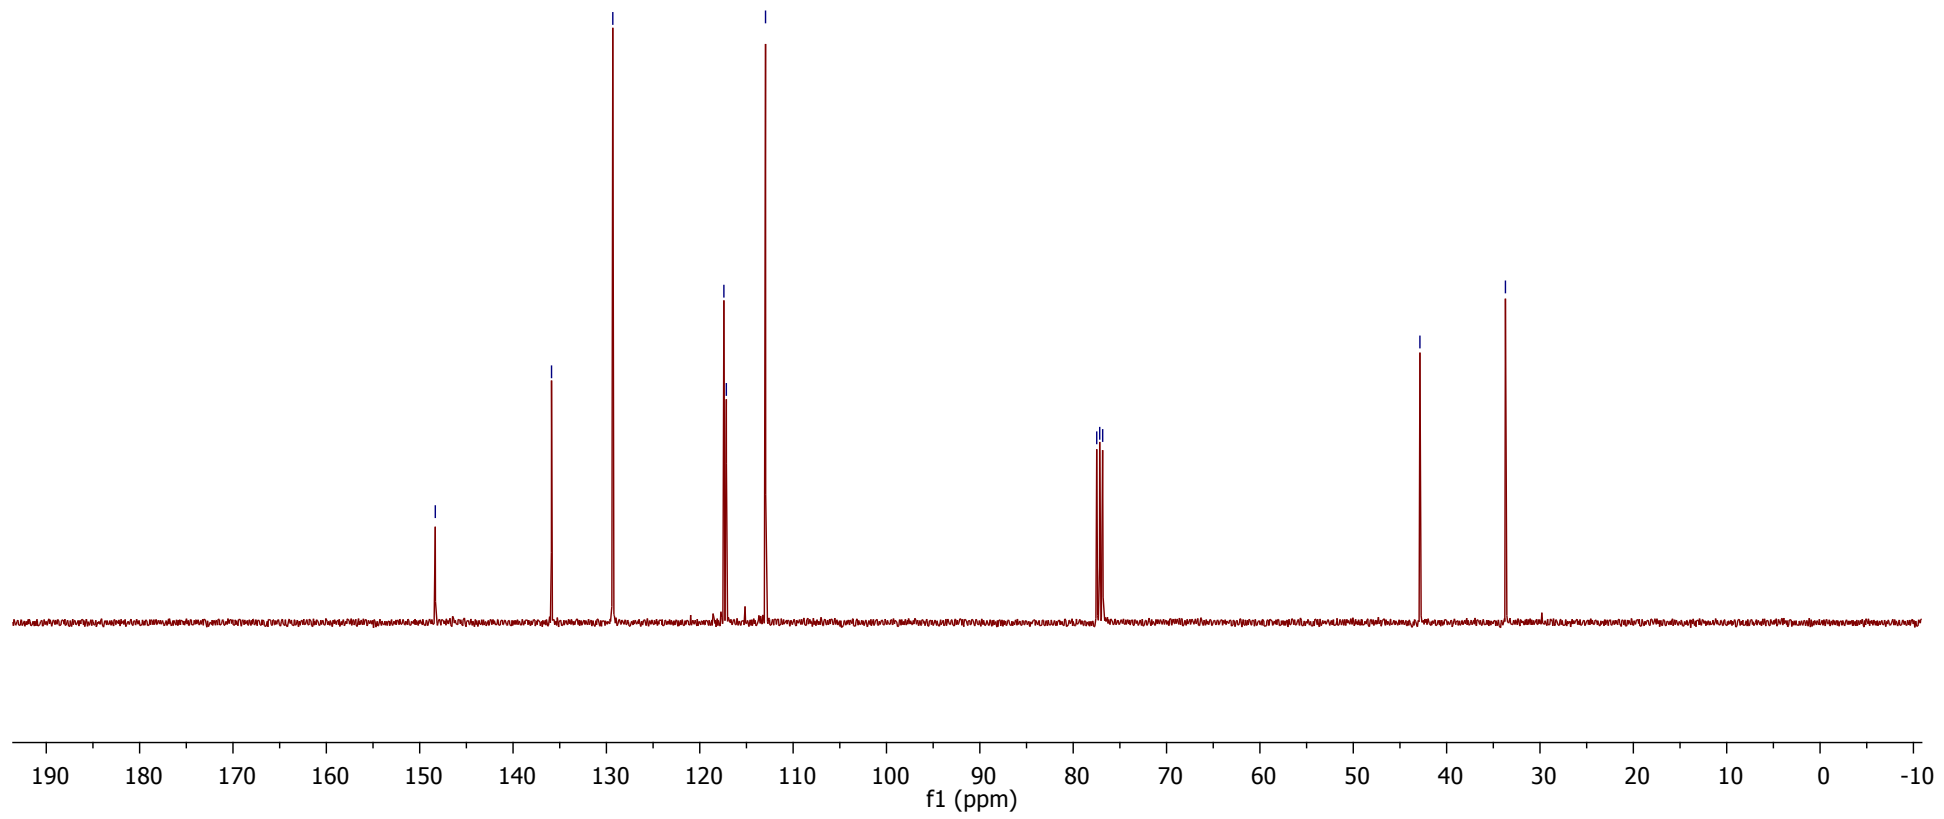

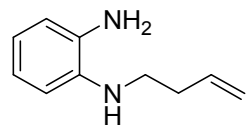

$^1\text{H}$ ,  $\text{CDCl}_3$ , 400 MHz

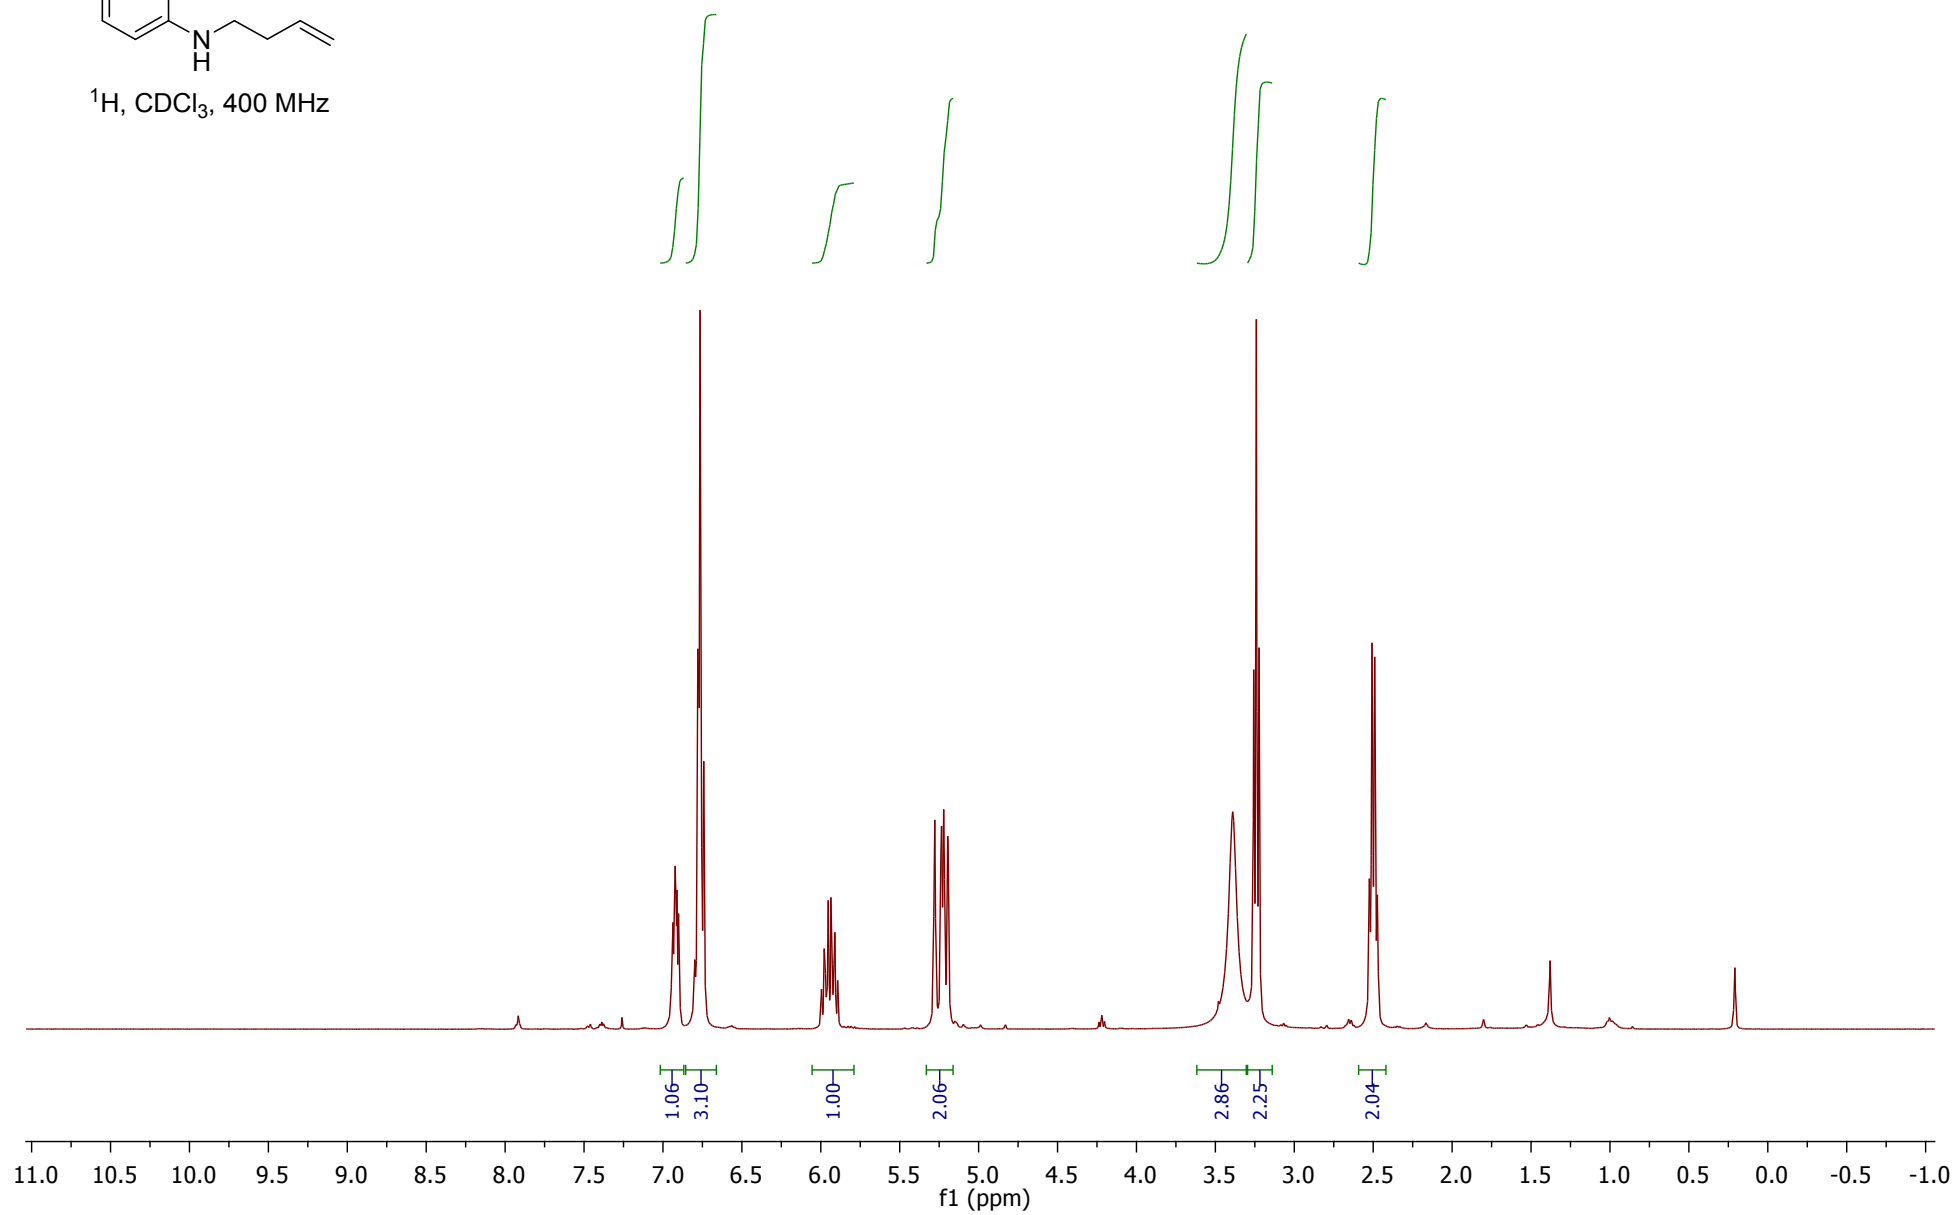

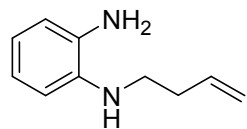

$^{13}\text{C}$ ,  $\text{CDCl}_3$ , 101 MHz

137.71  
135.98  
134.21

120.60  
118.50  
116.91  
116.38  
111.71

77.48  
77.16  
76.84

43.06

33.74

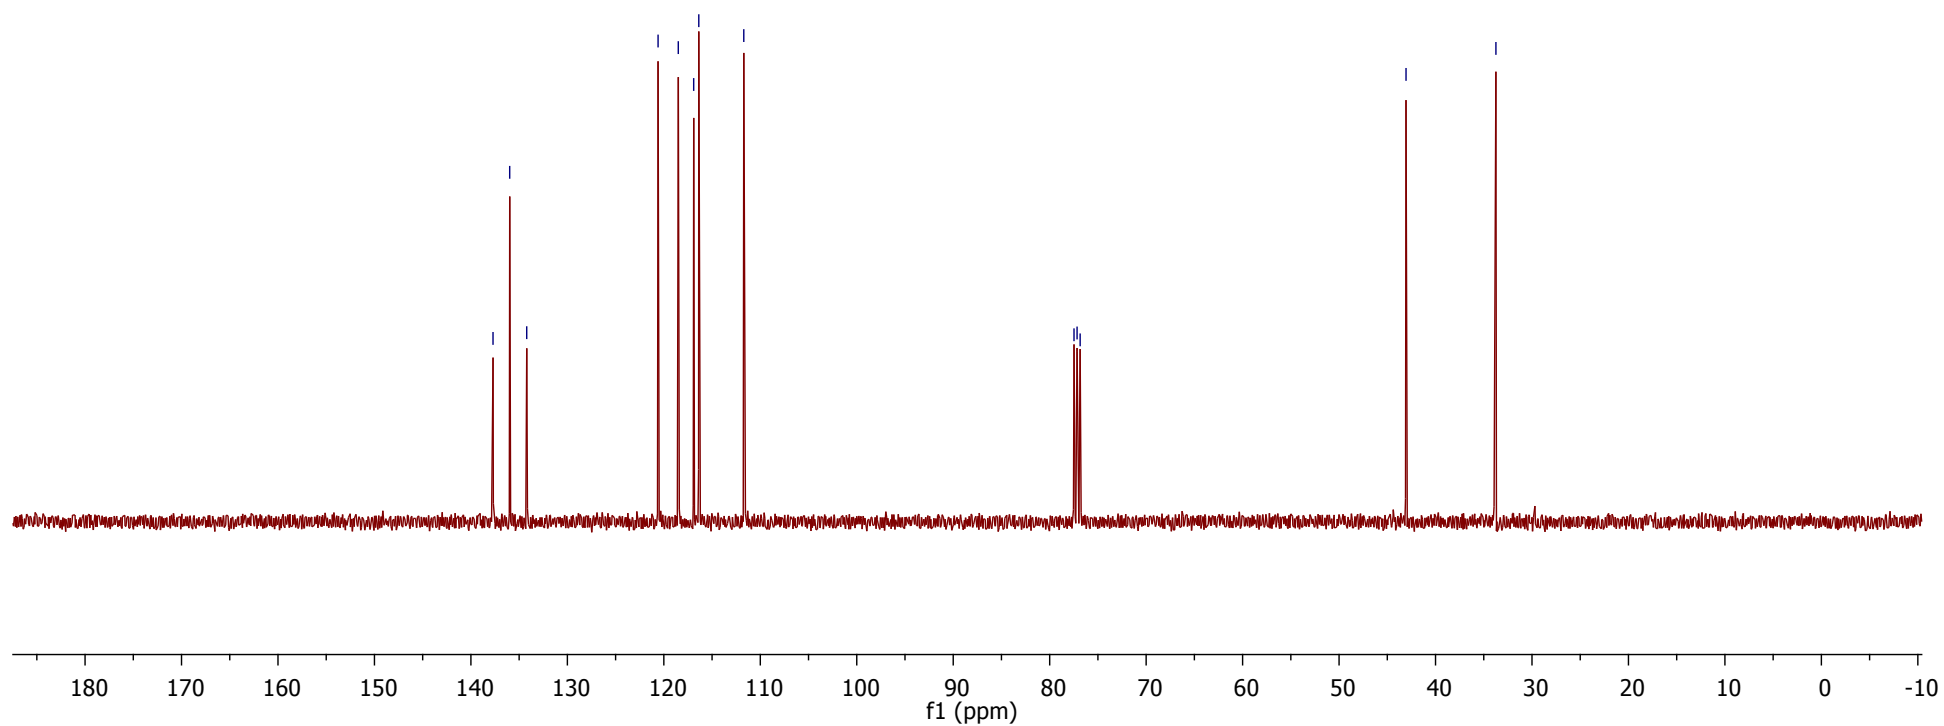

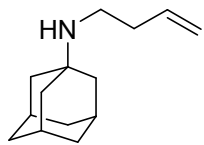

$^1\text{H}$ ,  $\text{CDCl}_3$ , 400 MHz

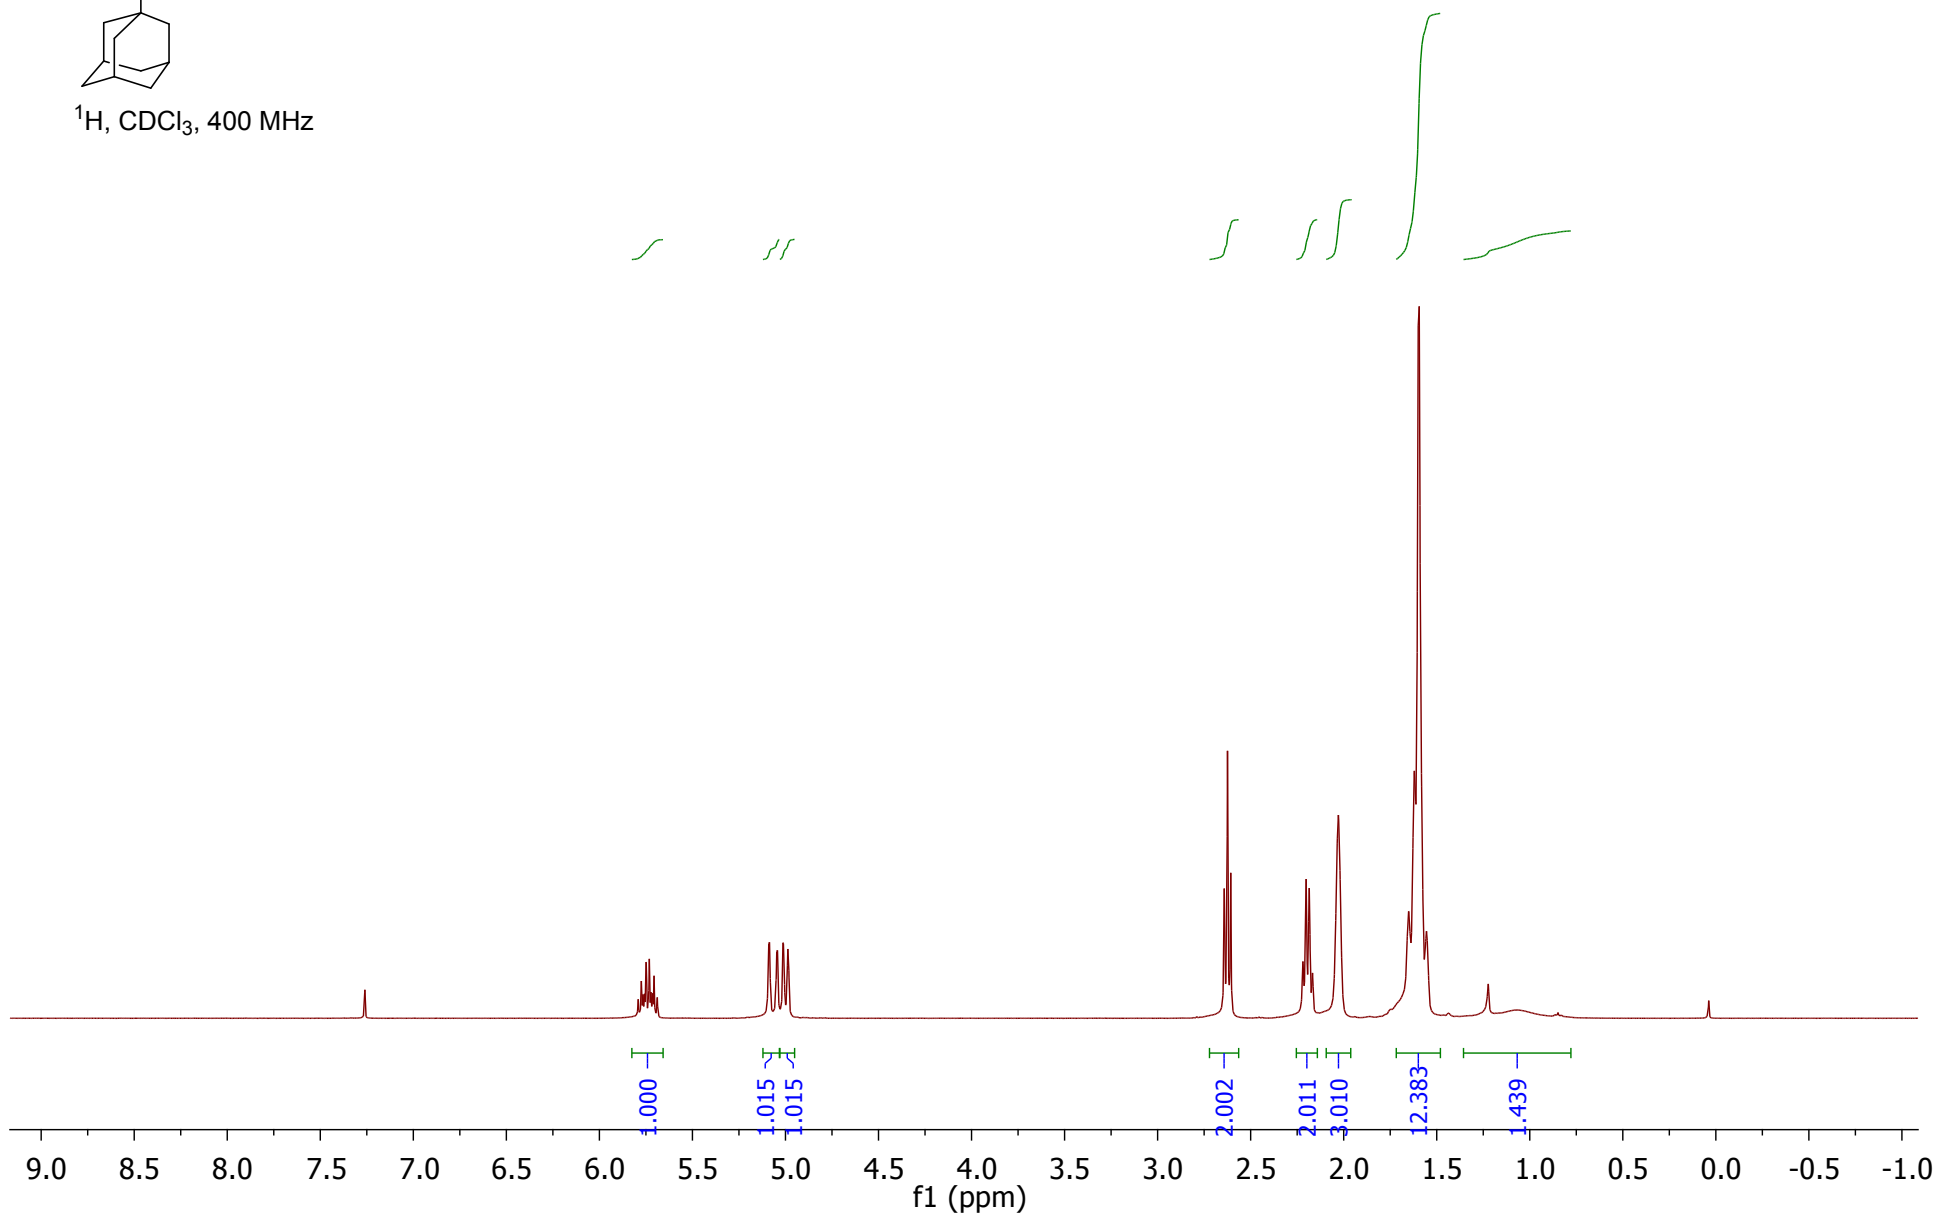



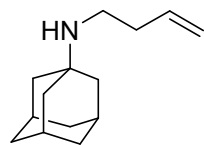

$^{13}\text{C}$ ,  $\text{CDCl}_3$ , 101 MHz

— 136.8521

— 116.3265

{ 77.4774  
{ 77.1566  
{ 76.8431

— 50.3312

~ 42.8720

~ 39.4741

~ 36.8565

~ 35.2232

~ 29.6671

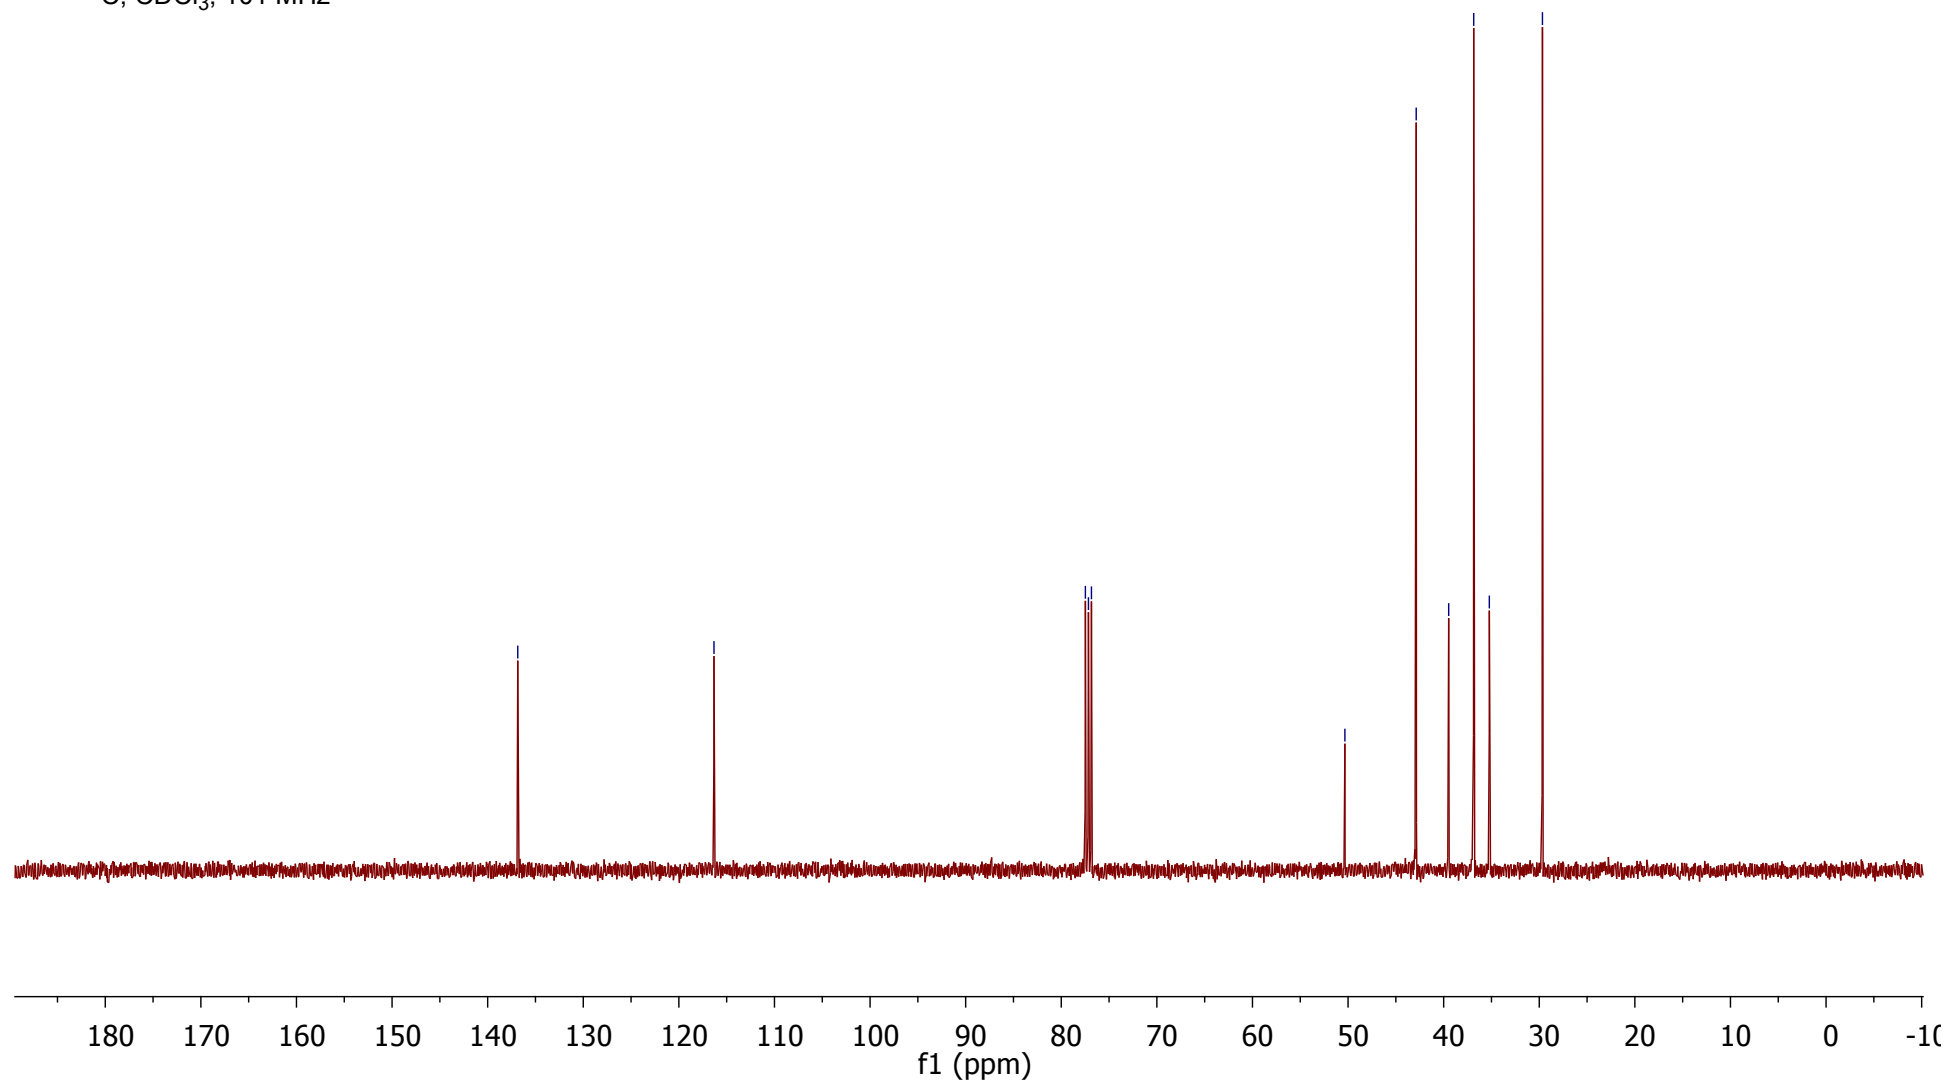

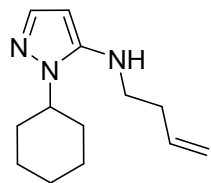

$^1\text{H}$ ,  $\text{CDCl}_3$ , 400 MHz

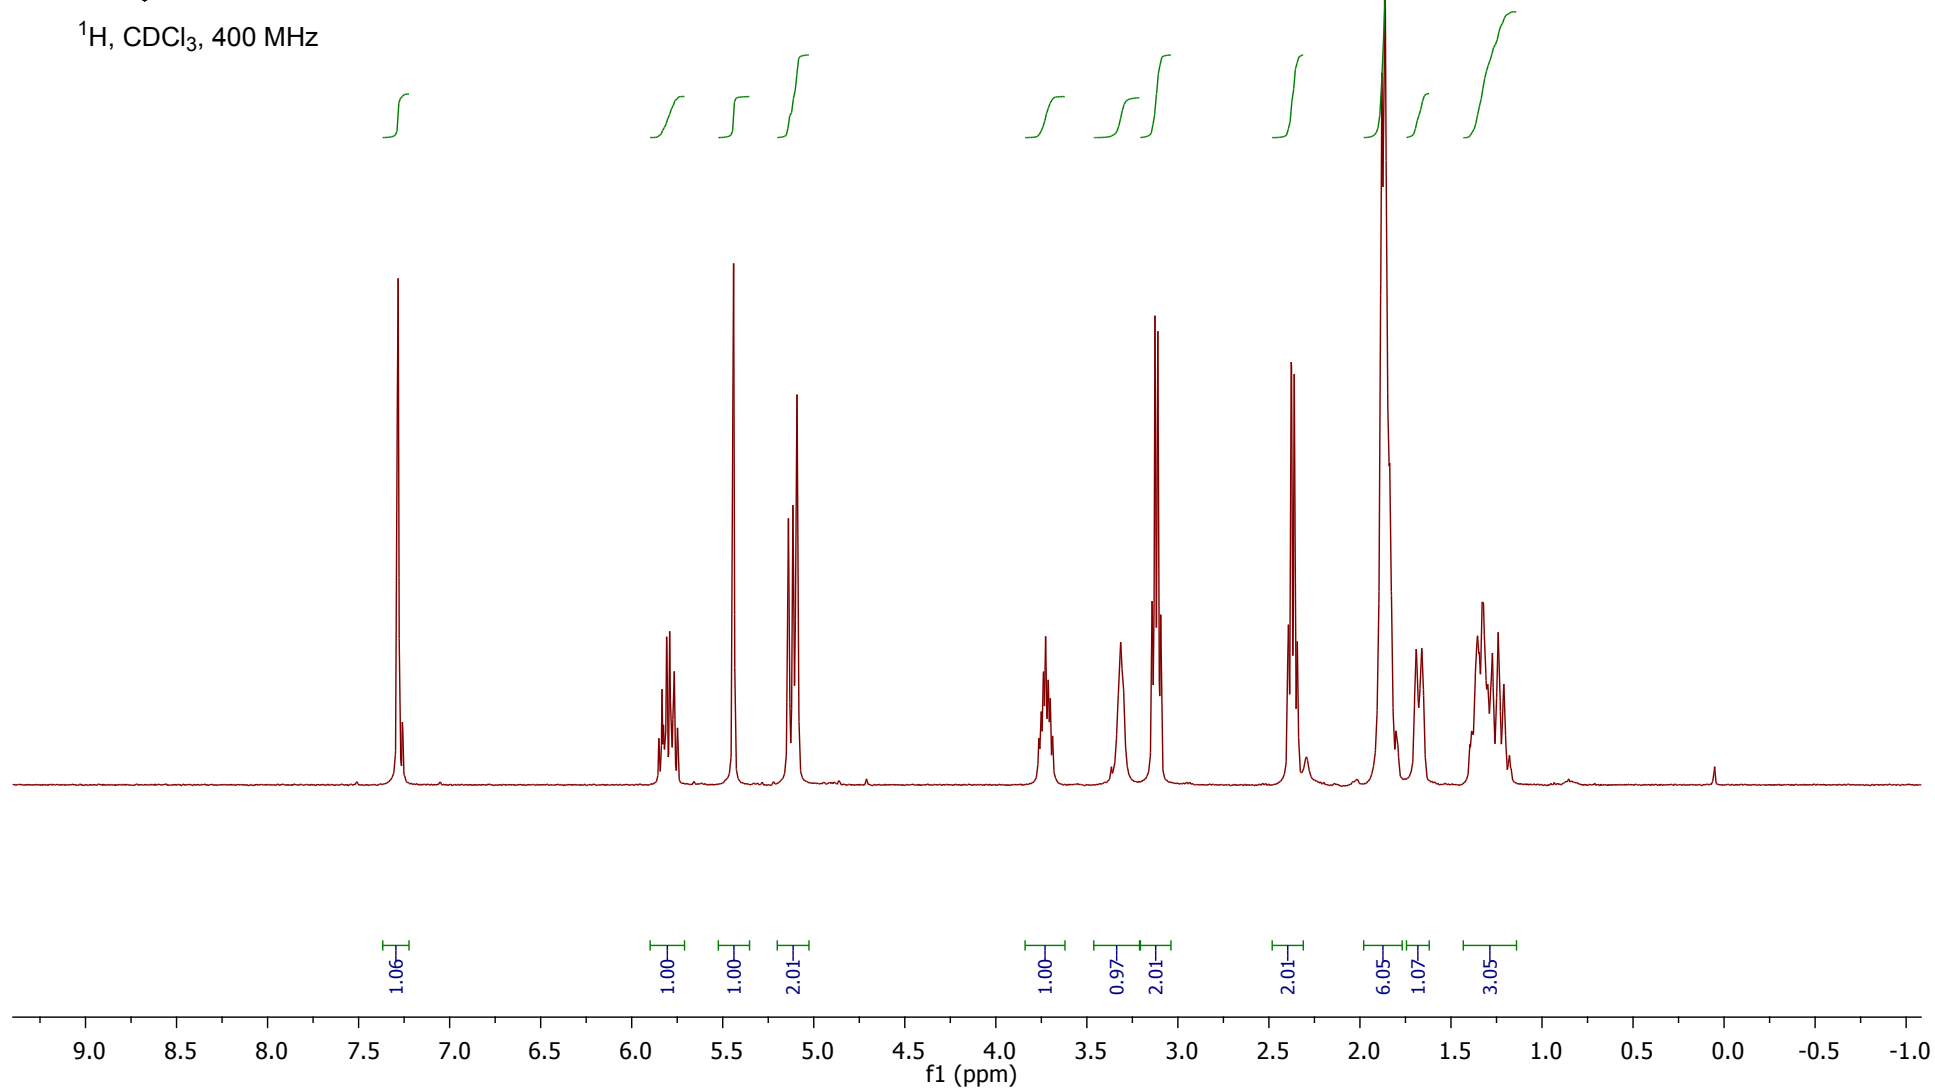

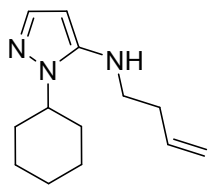

$^{13}\text{C}$ ,  $\text{CDCl}_3$ , 101 MHz

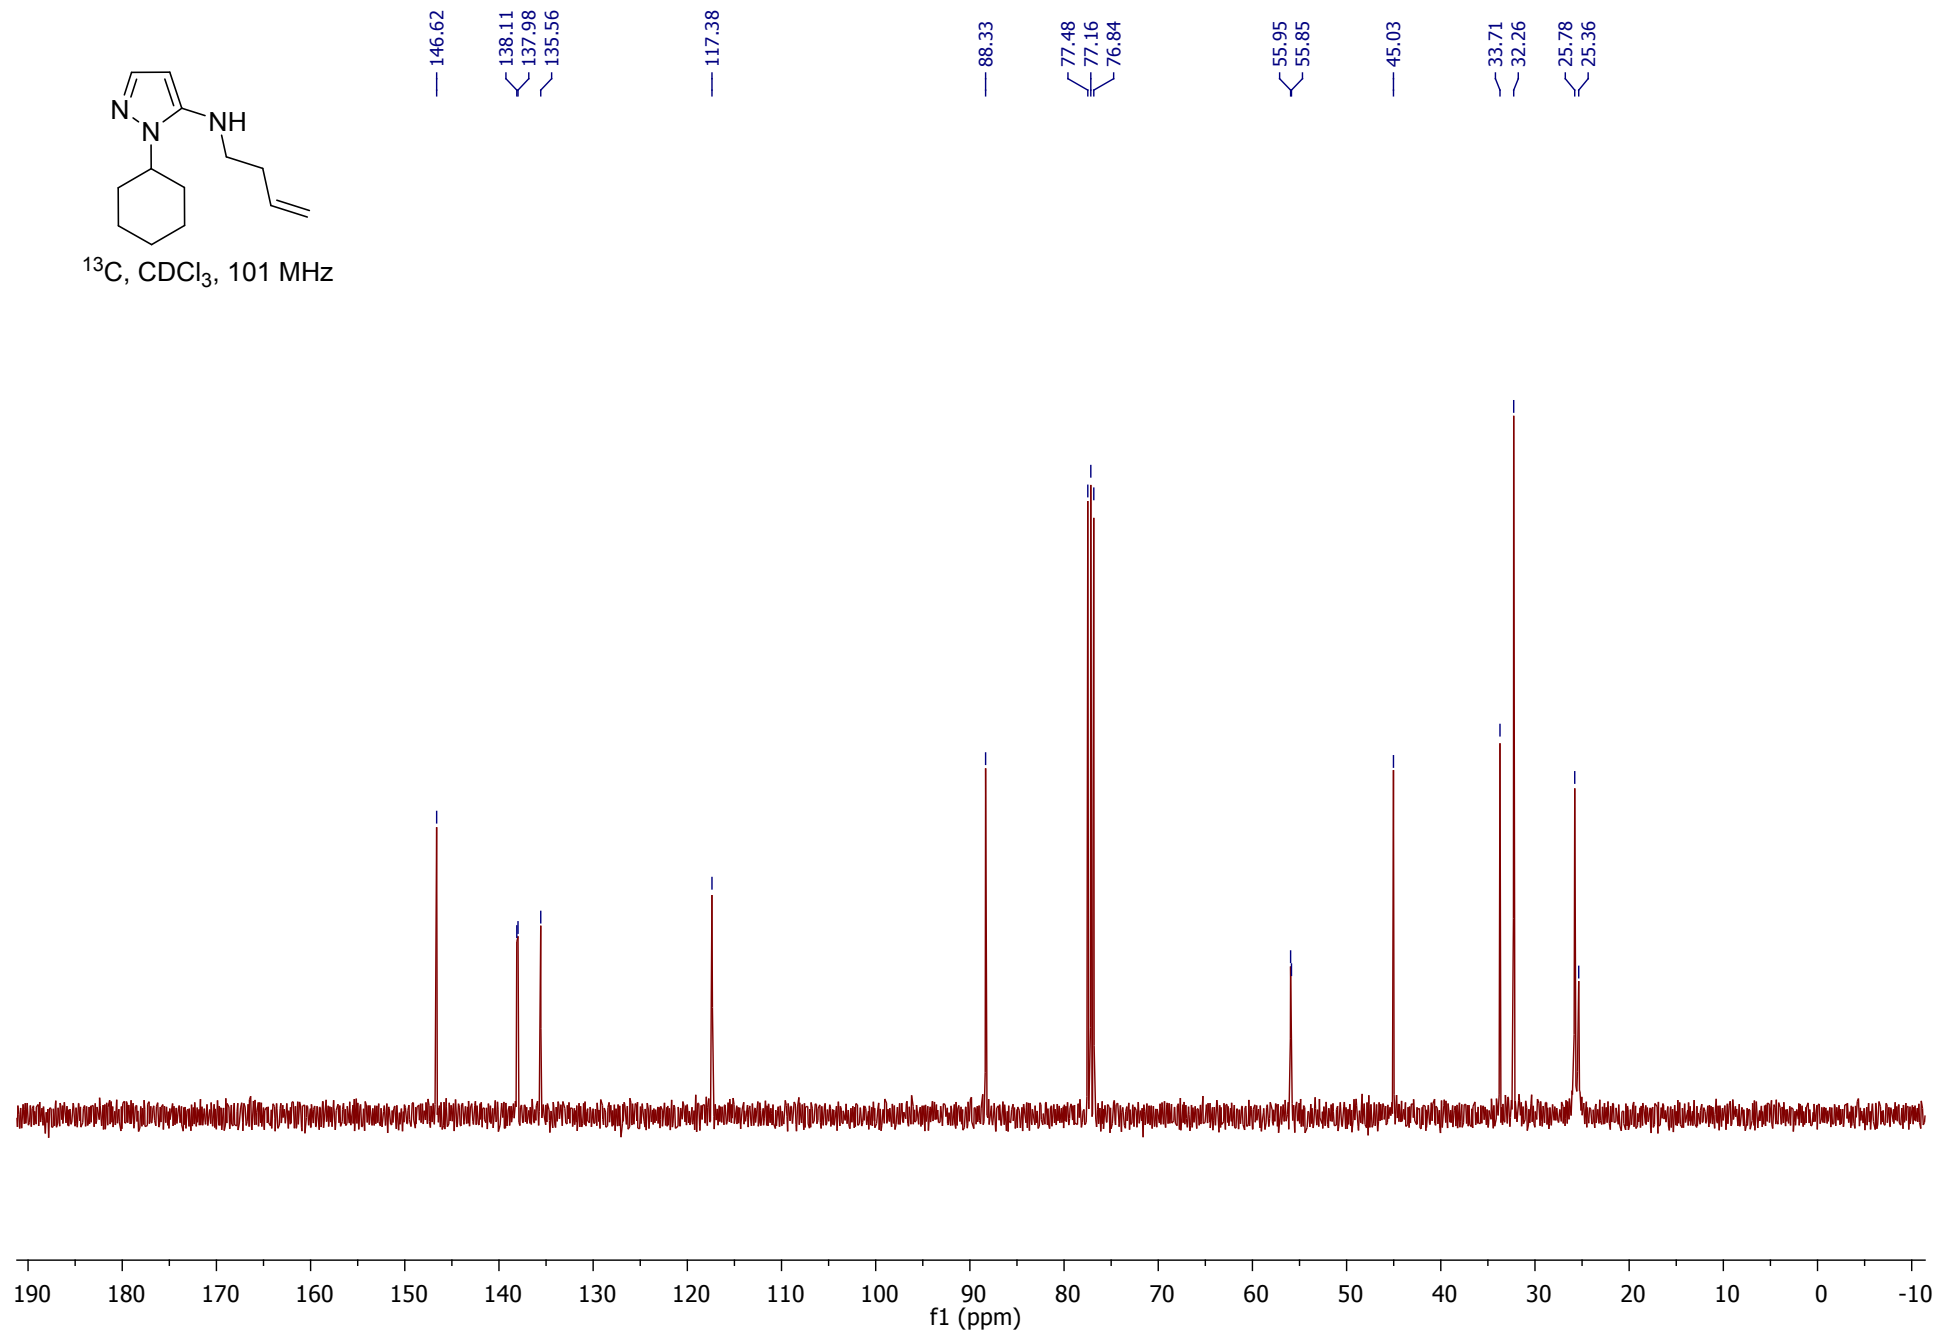

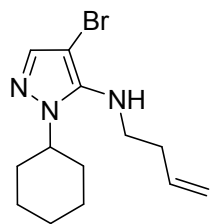

$^1\text{H}$ ,  $\text{CDCl}_3$ , 400 MHz

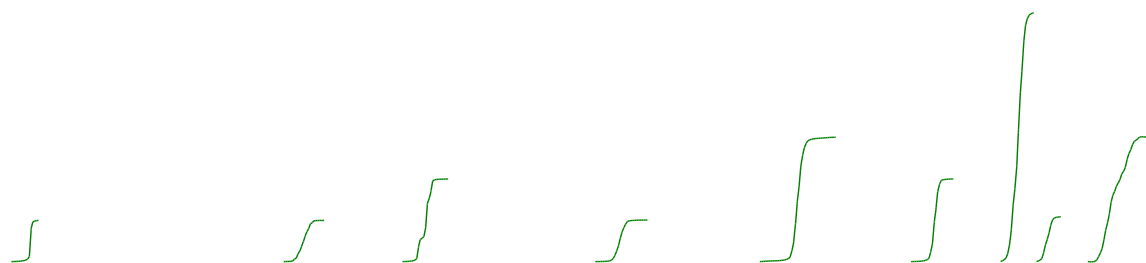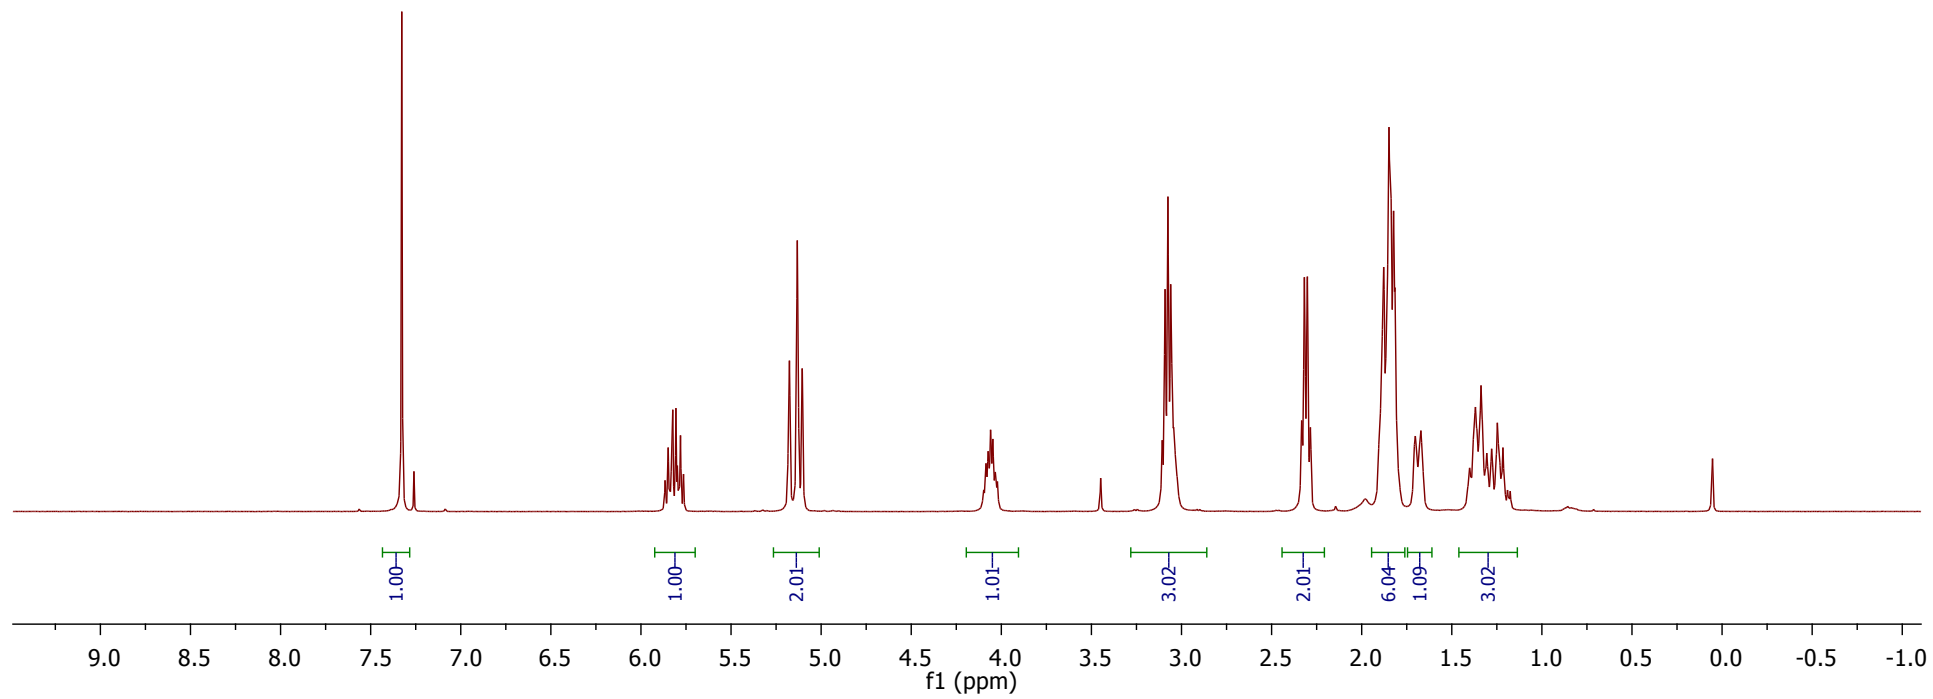

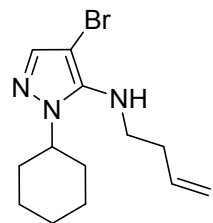

$^{13}\text{C}$ ,  $\text{CDCl}_3$ , 101 MHz

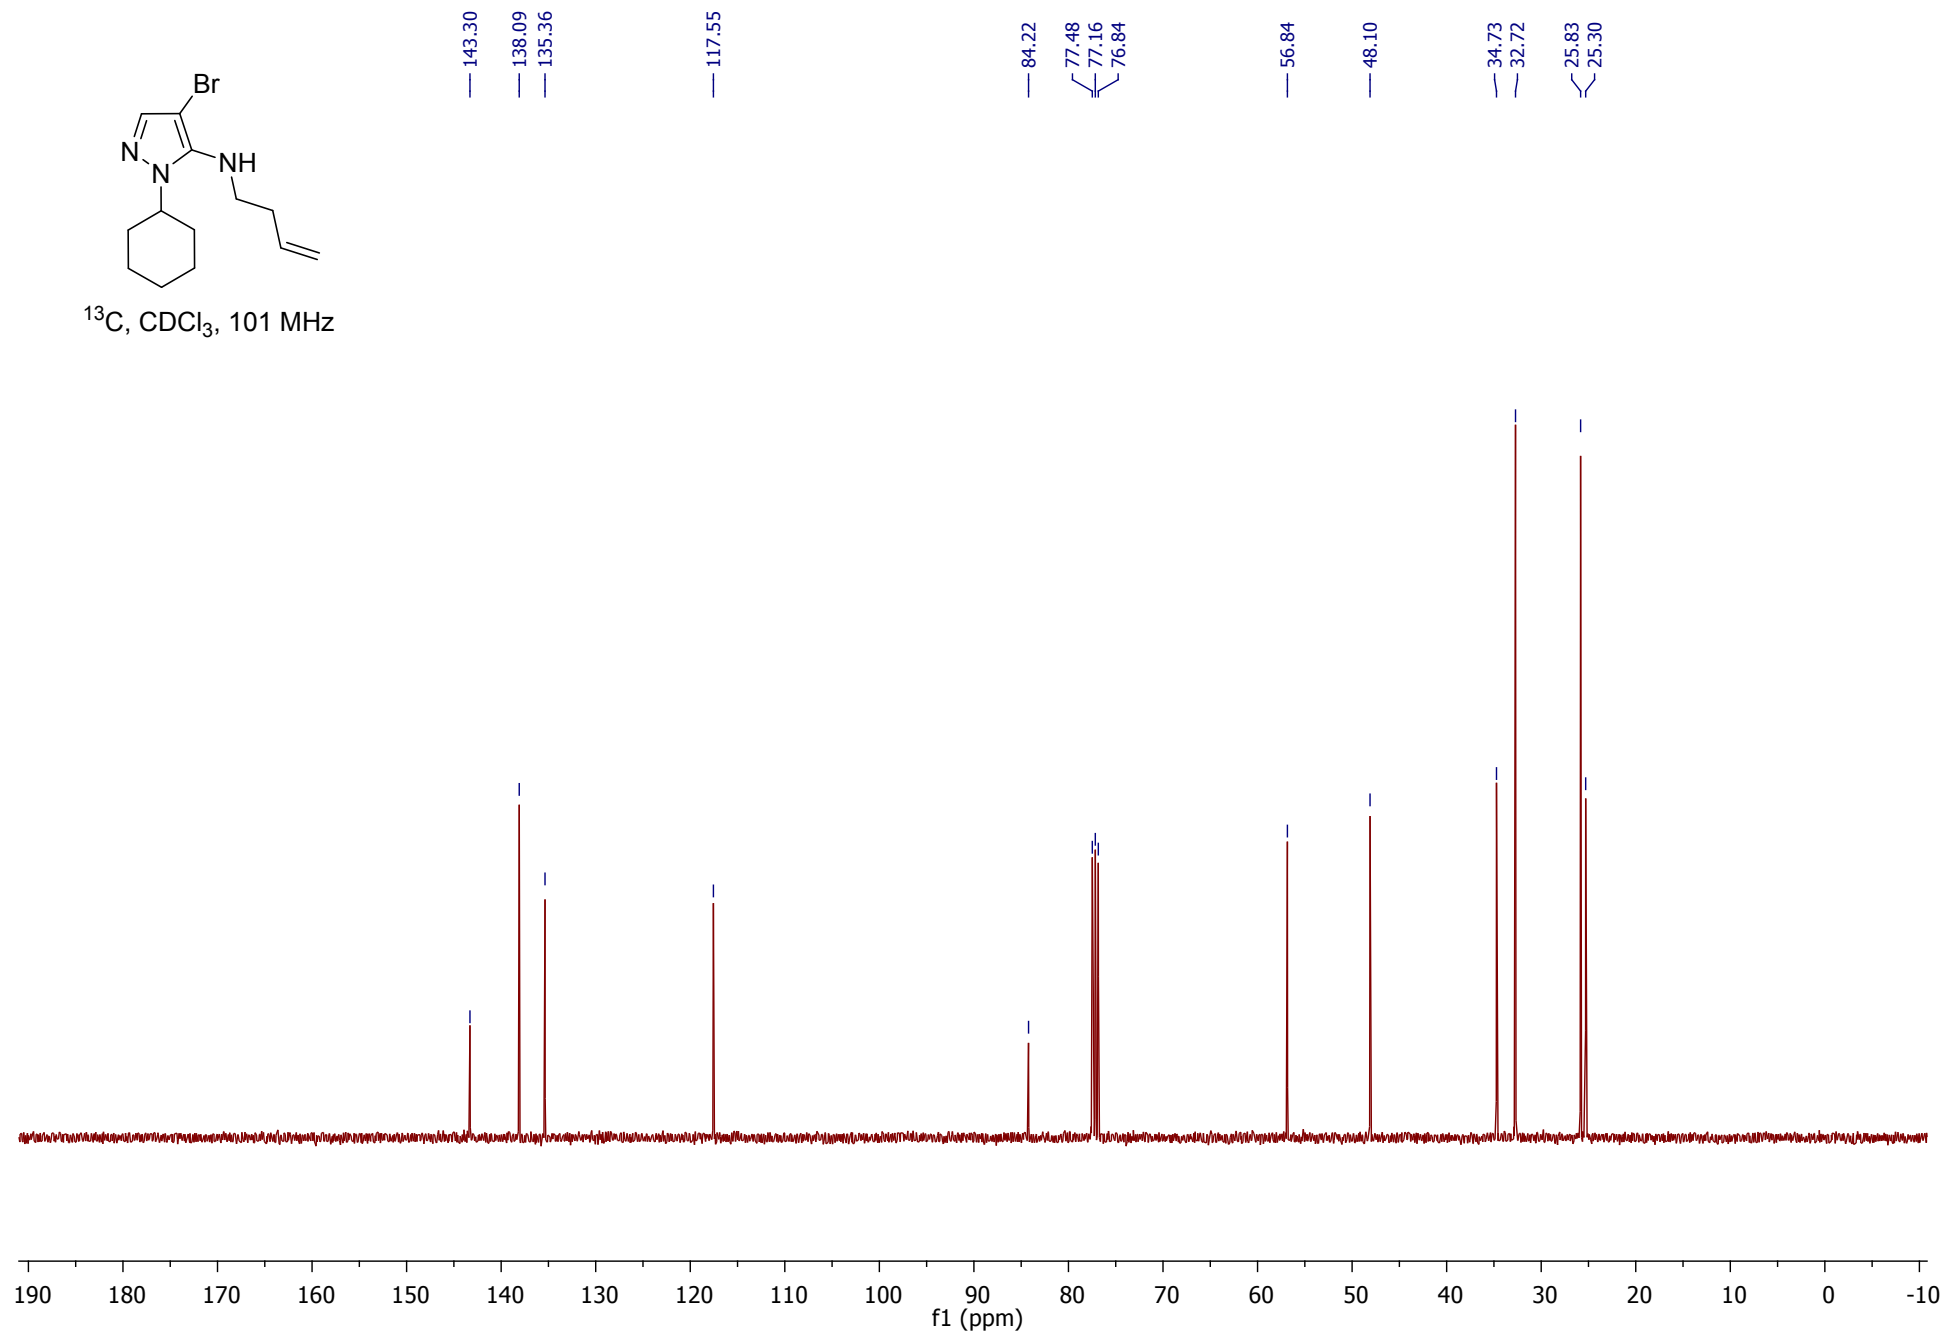

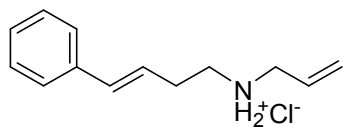

$^1\text{H}$ ,  $\text{CDCl}_3$ , 400 MHz

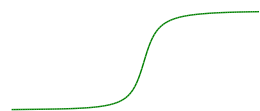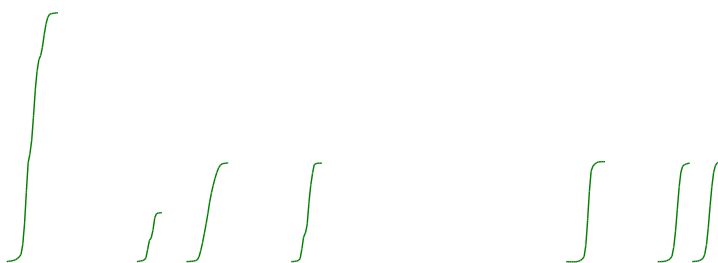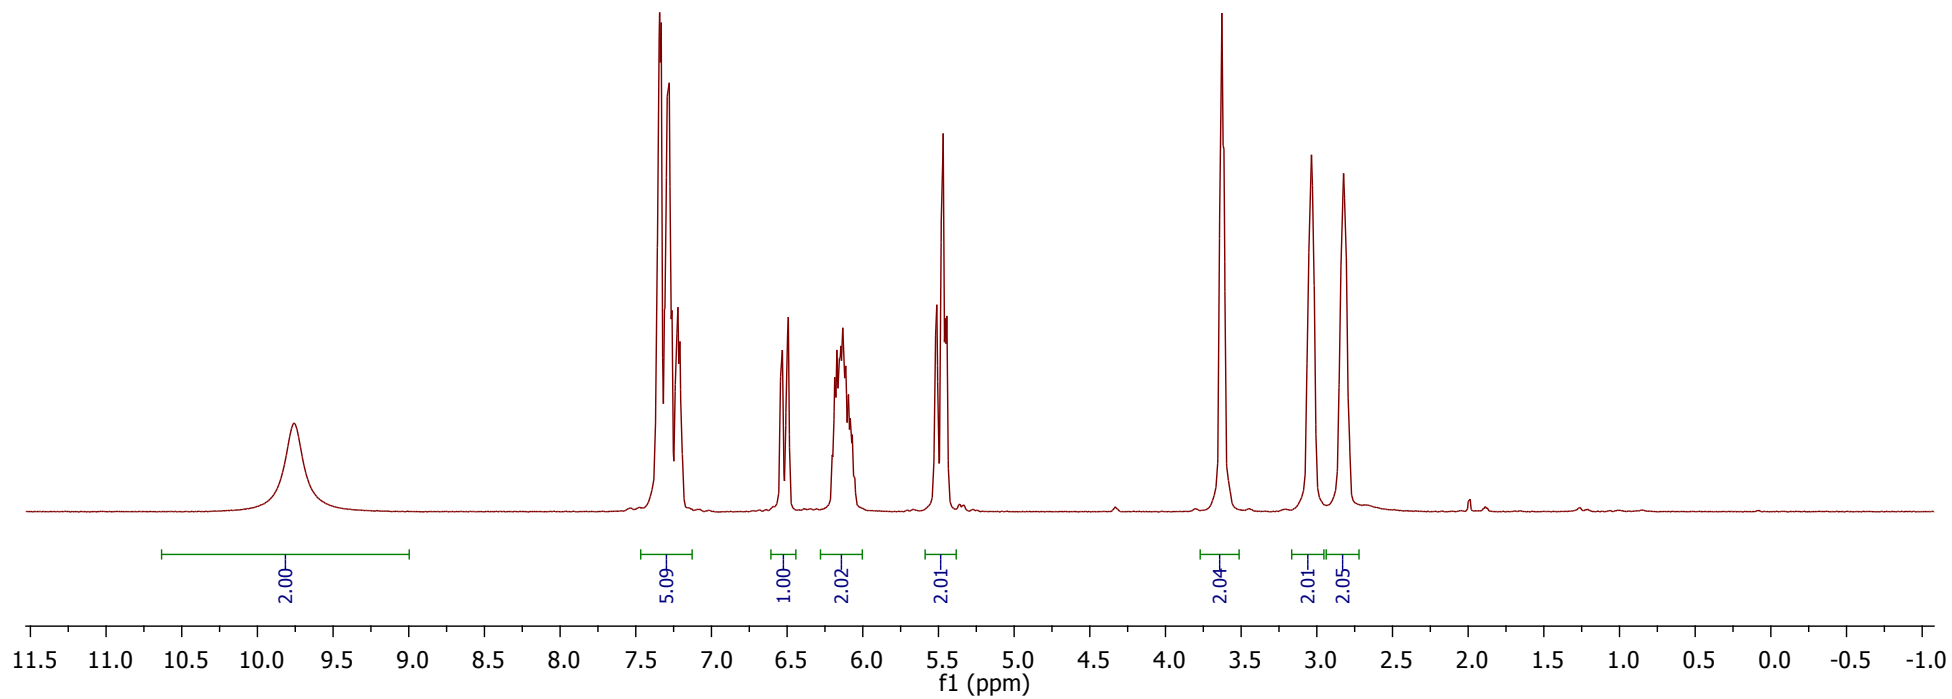

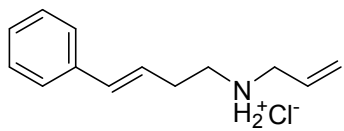

$^{13}\text{C}$ ,  $\text{CDCl}_3$ , 101 MHz

136.70  
133.60  
128.61  
127.77  
127.65  
126.34  
124.19  
123.92

77.48  
77.16  
76.84

49.68  
45.97

29.54

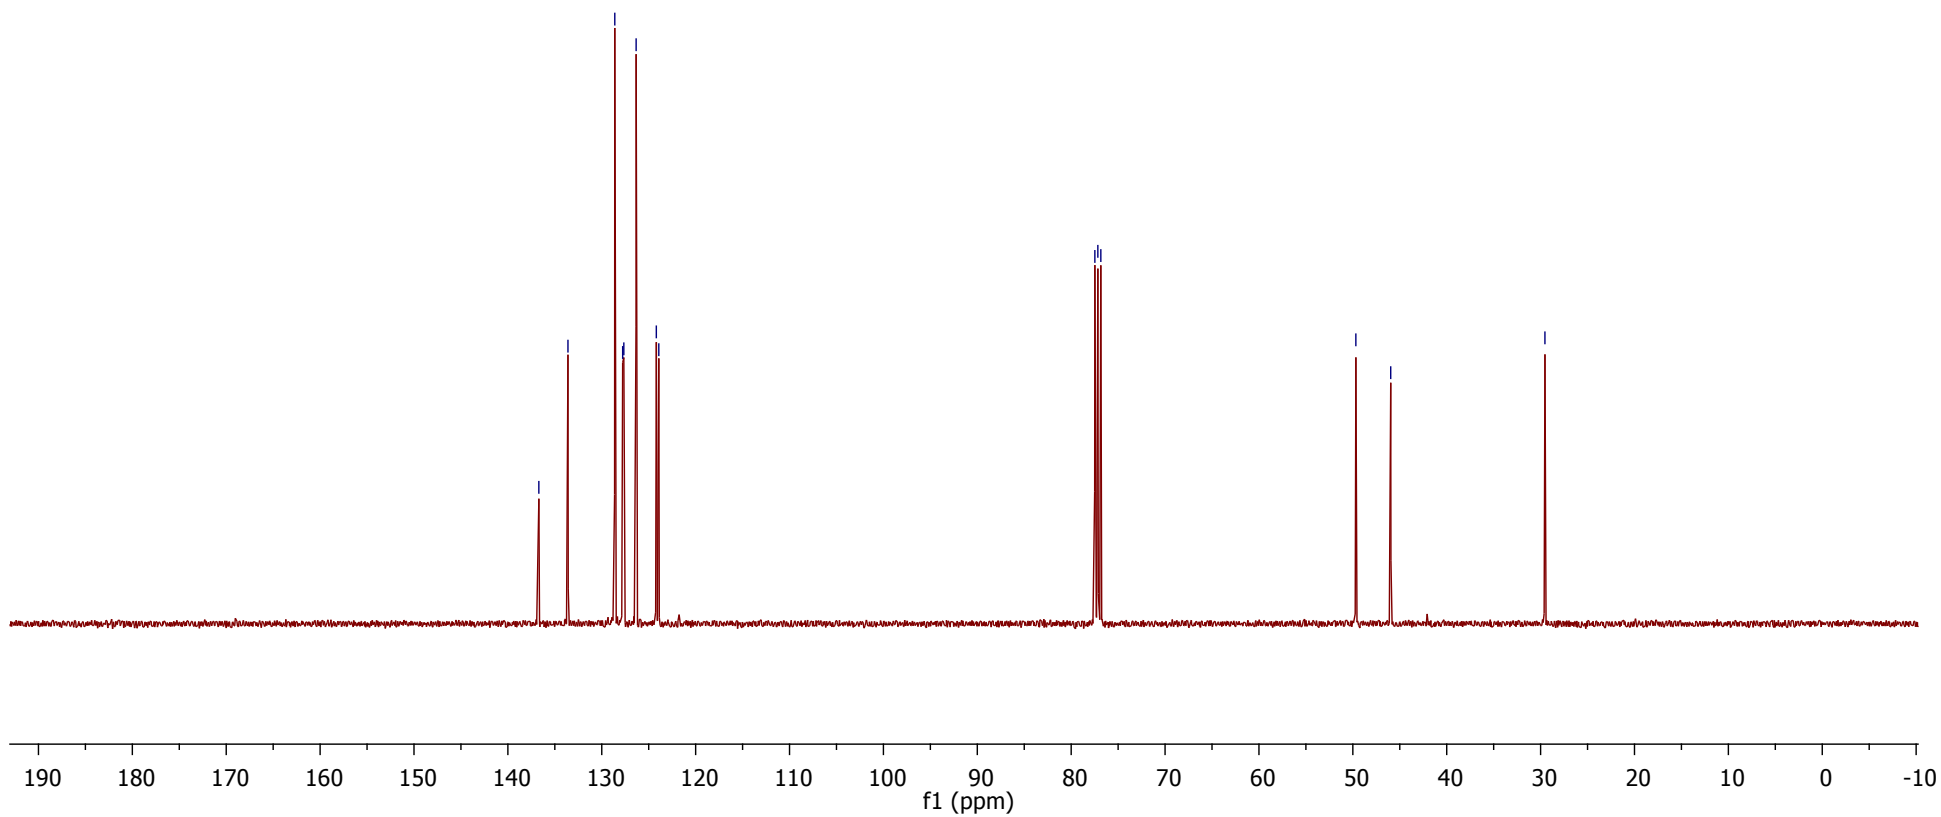

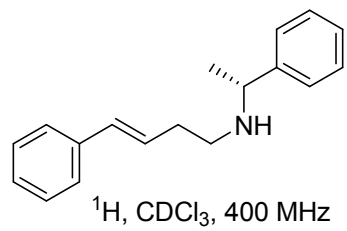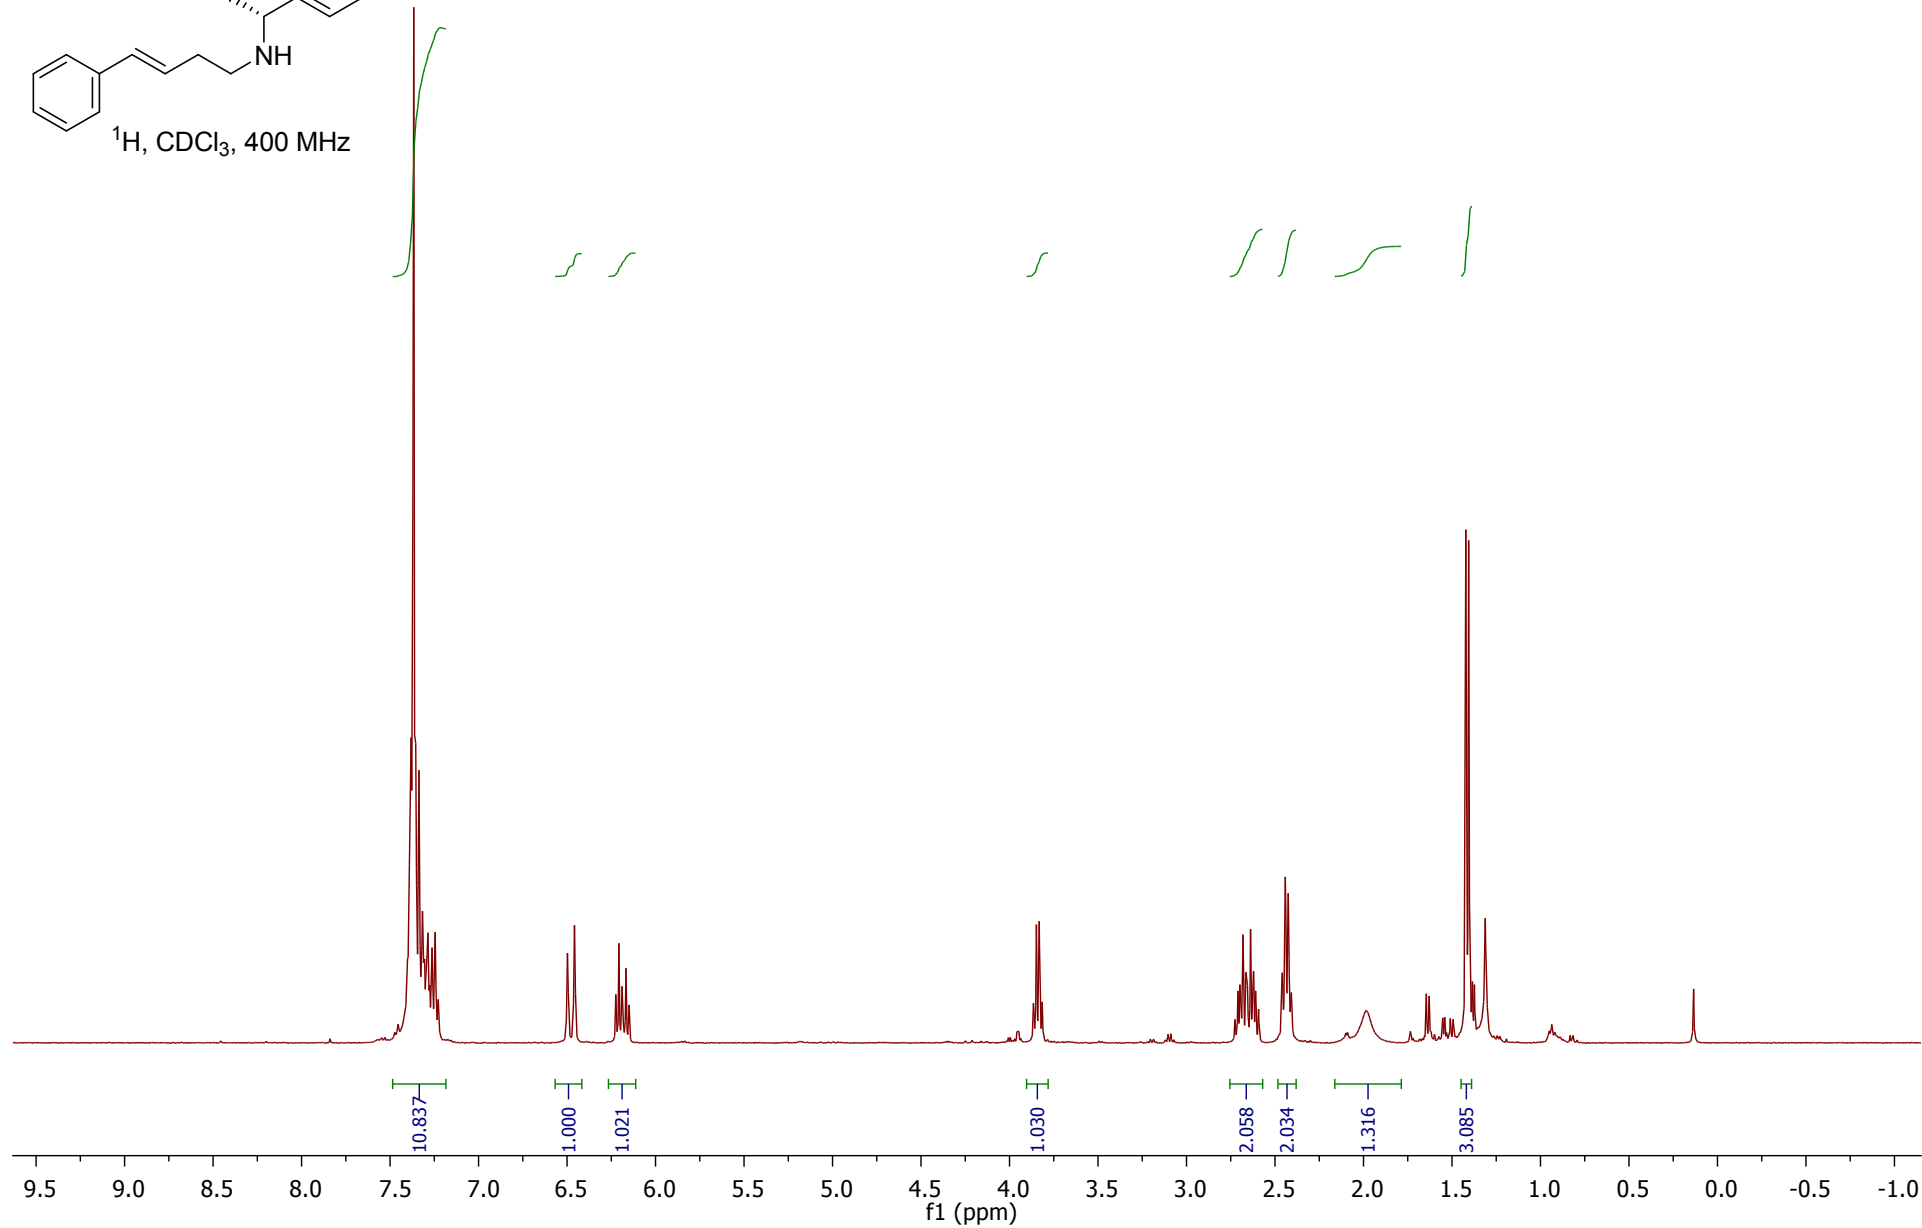



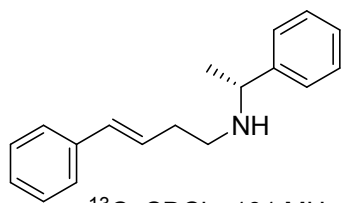

$^{13}\text{C}$ ,  $\text{CDCl}_3$ , 101 MHz

— 145.5728

— 137.5734

131.6602

128.5713

128.2897

127.0987

126.7114

126.1027

77.4775

77.1604

76.8422

58.4401

58.3627

— 47.1232

— 33.6691

24.6103

24.3682

24.1244

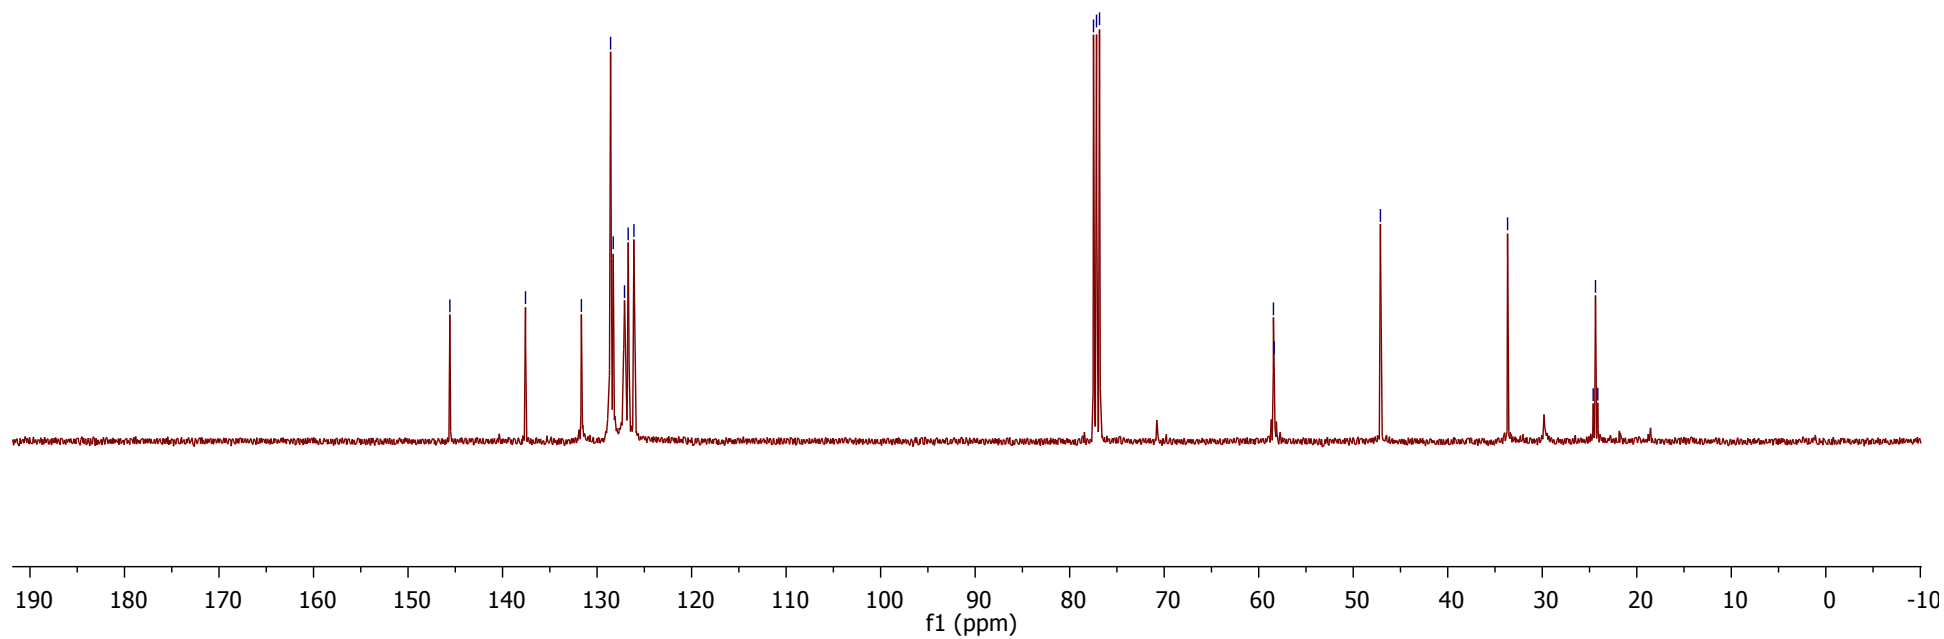

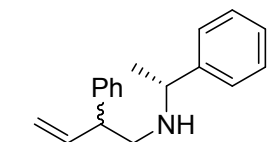

$^1\text{H}$ ,  $\text{CDCl}_3$ , 400 MHz

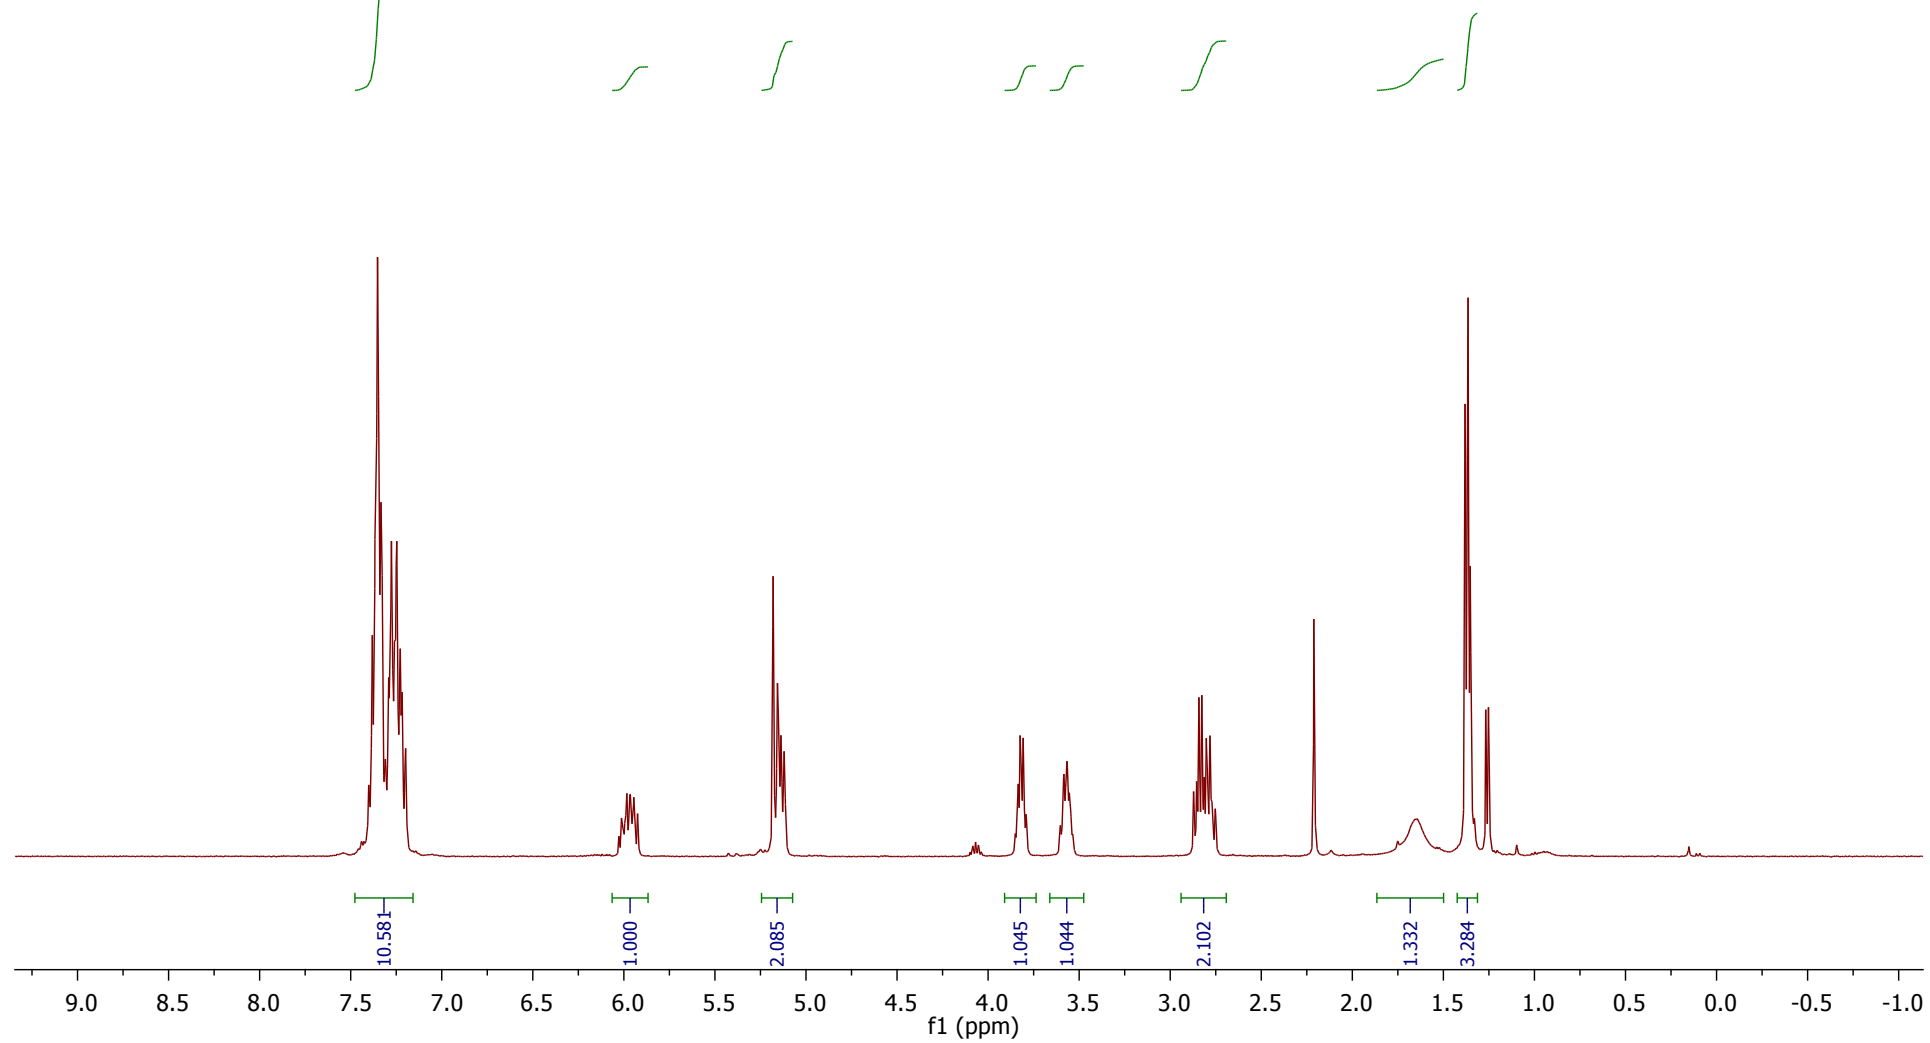

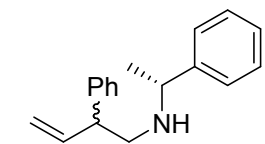

$^{13}\text{C}$ ,  $\text{CDCl}_3$ , 101 MHz

- 145.6165
- 142.4890
- 142.2295
- 140.3137
- 140.0952
- 128.6547
- 128.5157
- 127.7698
- 126.9628
- 126.6504
- 116.0610
- 115.7403
- 77.4783
- 77.1602
- 76.8429
- 58.3092
- 58.2193
- 58.1291
- 52.3174
- 52.1618
- 50.0488
- 50.0145
- 24.7240
- 24.6291
- 24.4722
- 24.3887
- 24.2300
- 24.1396

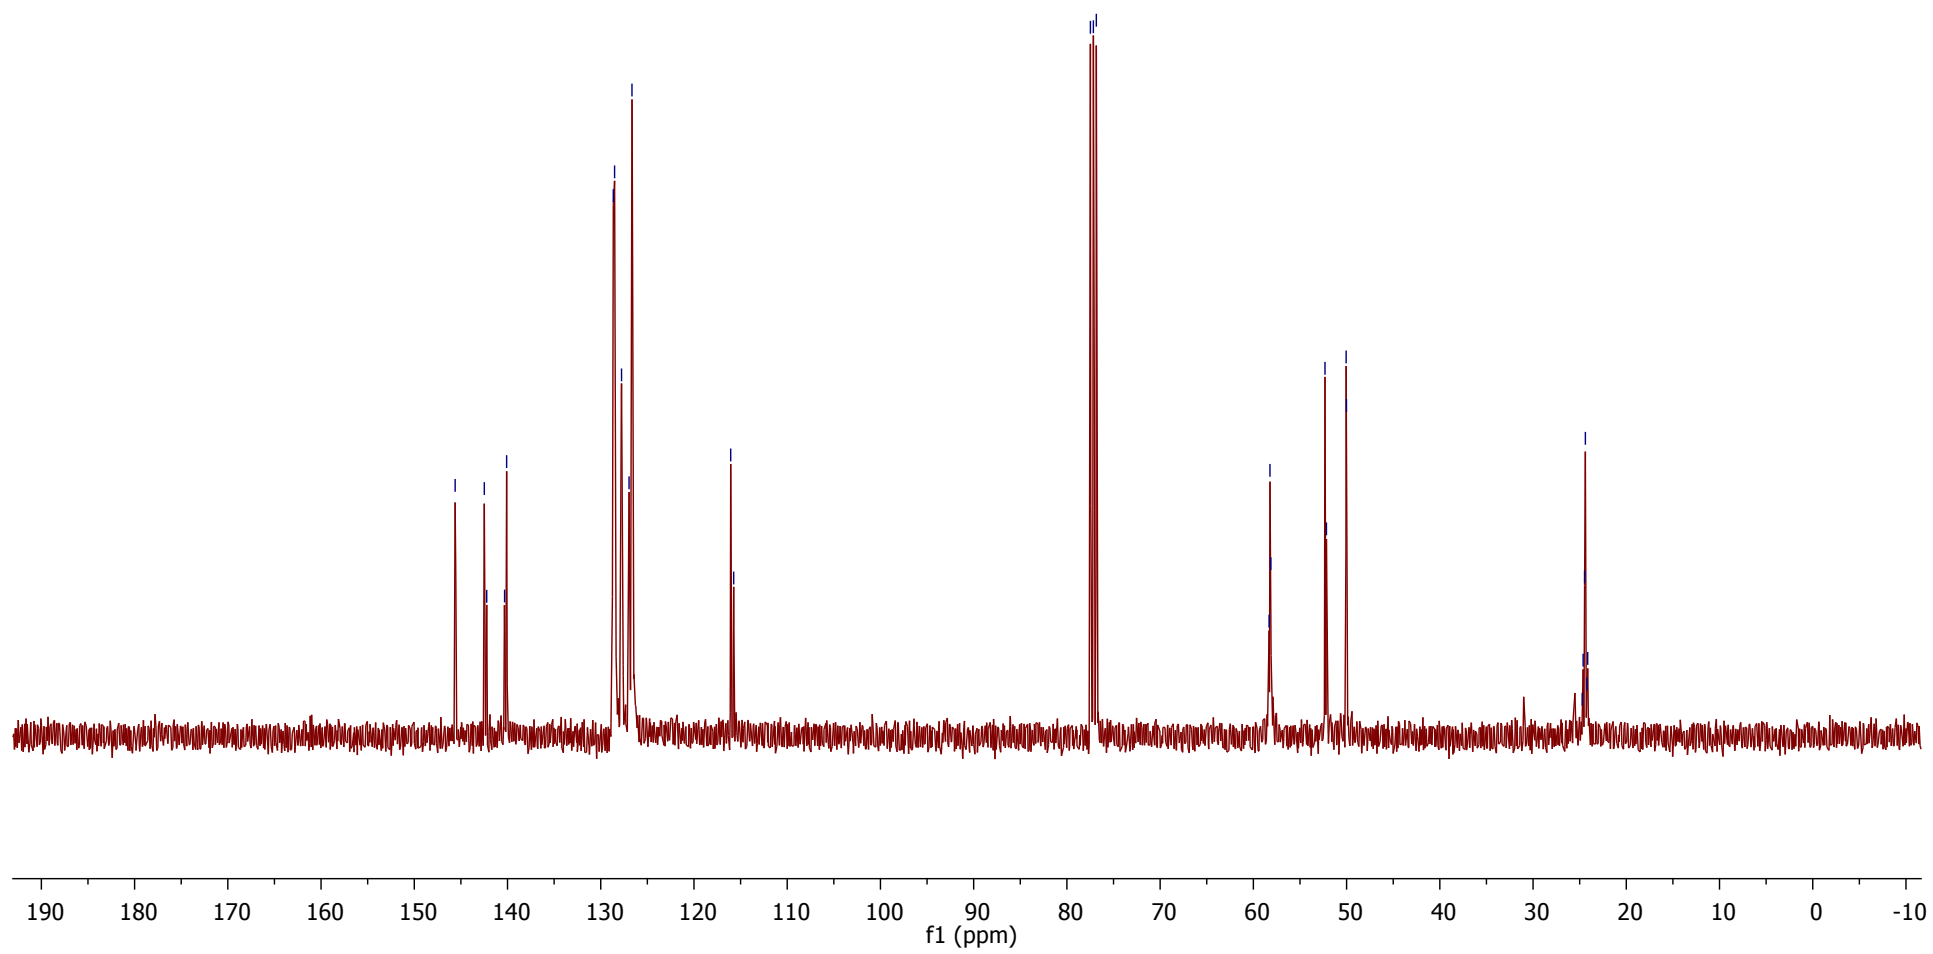

Supplement: c8ob02152j1.pdf [file c8ob02152j1.pdf]
